# Supplementary material
Source: HighWire-hosted journal article supplement (https://bmjopen.bmj.com/content/9/10/e031890)
Supplement: inline-supplementary-material-2 [file inline-supplementary-material-2.pdf]

**SEARCH RESULTS FOR CINAHL. LAST SEARCHED ON 23/04/19****TOTAL SEARCH RESULTS = 518**

| #   | Query                                                                                                                                                                                                                                                                                                                                                                                                                                                                                                                                                                                                                                                                                                                                                                                                                                                                    | Limiters/Expanders                                                              | Last Run Via | Results |
|-----|--------------------------------------------------------------------------------------------------------------------------------------------------------------------------------------------------------------------------------------------------------------------------------------------------------------------------------------------------------------------------------------------------------------------------------------------------------------------------------------------------------------------------------------------------------------------------------------------------------------------------------------------------------------------------------------------------------------------------------------------------------------------------------------------------------------------------------------------------------------------------|---------------------------------------------------------------------------------|--------------|---------|
| S11 | S6 AND S7 AND S8                                                                                                                                                                                                                                                                                                                                                                                                                                                                                                                                                                                                                                                                                                                                                                                                                                                         | Limiters - Published Date: 20080101-20181231                                    |              |         |
|     | Search modes - Find all my search termsInterface - EBSCOhost Research Databases                                                                                                                                                                                                                                                                                                                                                                                                                                                                                                                                                                                                                                                                                                                                                                                          |                                                                                 |              |         |
|     | Search Screen - Advanced Search                                                                                                                                                                                                                                                                                                                                                                                                                                                                                                                                                                                                                                                                                                                                                                                                                                          |                                                                                 |              |         |
|     | Database - CINAHL Plus with Full Text 518                                                                                                                                                                                                                                                                                                                                                                                                                                                                                                                                                                                                                                                                                                                                                                                                                                |                                                                                 |              |         |
| S10 | S6 AND S7 AND S8                                                                                                                                                                                                                                                                                                                                                                                                                                                                                                                                                                                                                                                                                                                                                                                                                                                         | Limiters - Published Date: 19960101-20181231                                    |              |         |
|     | Search modes - Find all my search termsInterface - EBSCOhost Research Databases                                                                                                                                                                                                                                                                                                                                                                                                                                                                                                                                                                                                                                                                                                                                                                                          |                                                                                 |              |         |
|     | Search Screen - Advanced Search                                                                                                                                                                                                                                                                                                                                                                                                                                                                                                                                                                                                                                                                                                                                                                                                                                          |                                                                                 |              |         |
|     | Database - CINAHL Plus with Full Text 575                                                                                                                                                                                                                                                                                                                                                                                                                                                                                                                                                                                                                                                                                                                                                                                                                                |                                                                                 |              |         |
| S9  | S6 AND S7 AND S8                                                                                                                                                                                                                                                                                                                                                                                                                                                                                                                                                                                                                                                                                                                                                                                                                                                         | Search modes - Find all my search termsInterface - EBSCOhost Research Databases |              |         |
|     | Search Screen - Advanced Search                                                                                                                                                                                                                                                                                                                                                                                                                                                                                                                                                                                                                                                                                                                                                                                                                                          |                                                                                 |              |         |
|     | Database - CINAHL Plus with Full Text 608                                                                                                                                                                                                                                                                                                                                                                                                                                                                                                                                                                                                                                                                                                                                                                                                                                |                                                                                 |              |         |
| S8  | S4 OR S5                                                                                                                                                                                                                                                                                                                                                                                                                                                                                                                                                                                                                                                                                                                                                                                                                                                                 | Search modes - Find all my search termsInterface - EBSCOhost Research Databases |              |         |
|     | Search Screen - Advanced Search                                                                                                                                                                                                                                                                                                                                                                                                                                                                                                                                                                                                                                                                                                                                                                                                                                          |                                                                                 |              |         |
|     | Database - CINAHL Plus with Full Text 98,919                                                                                                                                                                                                                                                                                                                                                                                                                                                                                                                                                                                                                                                                                                                                                                                                                             |                                                                                 |              |         |
| S7  | S2 OR S3                                                                                                                                                                                                                                                                                                                                                                                                                                                                                                                                                                                                                                                                                                                                                                                                                                                                 | Search modes - Find all my search termsInterface - EBSCOhost Research Databases |              |         |
|     | Search Screen - Advanced Search                                                                                                                                                                                                                                                                                                                                                                                                                                                                                                                                                                                                                                                                                                                                                                                                                                          |                                                                                 |              |         |
|     | Database - CINAHL Plus with Full Text 37,921                                                                                                                                                                                                                                                                                                                                                                                                                                                                                                                                                                                                                                                                                                                                                                                                                             |                                                                                 |              |         |
| S6  | (MH "Africa South of the Sahara+") OR (MH "Africa, Western+") OR (MH "Africa, Southern+") OR (MH "Africa, Northern+") OR (MH "Africa, Eastern+") OR (MH "Africa, Central+") OR "Africa OR ( sub-saharan africa or sub saharan africa or sub sahara ) OR sub saharan africa[title]" OR (MH "Africa+") OR (MH "South Africa") OR (MH "Namibia") OR (MH "Benin") OR (MH "Burkina Faso") OR (MH "Cape Verde") OR (MH "Cote d'Ivoire") OR (MH "Gambia") OR (MH "Ghana") OR (MH "Guinea") OR (MH "Guinea-Bissau") OR (MH "Liberia") OR (MH "Mali") OR (MH "Mauritania") OR (MH "Niger") OR (MH "Nigeria") OR (MH "Senegal") OR (MH "Sierra Leone") OR (MH "Togo") OR (MH "Angola") OR (MH "Botswana") OR (MH "Lesotho") OR (MH "Malawi") OR (MH "Mozambique") OR (MH "Swaziland") OR (MH "Zambia") OR (MH "Zimbabwe") OR (MH "Algeria") OR (MH "Egypt") OR (MH "Libya") OR (MH |                                                                                 |              |         |

"Morocco") OR (MH "Cameroon") OR (MH "Central African Republic") OR (MH "Chad") OR (MH "Congo") OR (MH "Democratic Republic of the Congo") OR (MH "Equatorial Guinea") OR (MH "Gabon") OR (MH "Burundi") OR (MH "Djibouti") OR (MH "Eritrea") OR (MH "Ethiopia") OR (MH "Kenya") OR (MH "Rwanda") OR (MH "Sudan") OR (MH "Somalia") OR (MH "Tanzania") OR (MH "Uganda") Search modes - Find all my search terms Interface - EBSCOhost Research Databases

Search Screen - Advanced Search

Database - CINAHL Plus with Full Text 70,341

S5 (MH "Health Services Accessibility") OR "usage OR access" Search modes - Find all my search terms Interface - EBSCOhost Research Databases

Search Screen - Advanced Search

Database - CINAHL Plus with Full Text 74,113

S4 (MH "Drug Utilization") OR (MH "Health Resource Utilization") OR (MH "Bed Occupancy") OR (MH "Resource Utilization Group") OR "( Equipment AND Supplies Utilization ) OR Drug Utilization OR ( Procedures AND Techniques Utilization ) OR ( Facilities AND Services Utilization. ) OR utilization" OR (MH "Utilization Review") Search modes - Find all my search terms Interface - EBSCOhost Research Databases

Search Screen - Advanced Search

Database - CINAHL Plus with Full Text 28,228

S3 (MH "Maternal Health Services") OR (MH "Maternal-Child Health") OR "maternal health OR Maternal Health Services OR Maternal Health OR Pregnancy" Search modes - Find all my search terms Interface - EBSCOhost Research Databases

Search Screen - Advanced Search

Database - CINAHL Plus with Full Text 10,586

S2 (MH "Prenatal Care") OR (MH "Pregnancy in Adolescence") OR (MH "Pregnancy Tests, Immunologic") OR "Prenatal Care OR antenatal OR Pregnancy" OR (MH "Ultrasonography, Prenatal") OR (MH "Gender Specific Care") OR (MH "Pregnancy Care (Saba CCC)") Search modes - Find all my search terms Interface - EBSCOhost Research Databases

Search Screen - Advanced Search

Database - CINAHL Plus with Full Text 28,499

S1 "determinant OR Social Determinants of Health OR factor\* OR predict\*" OR (MH "Social Determinants of Health") Search modes - Find all my search terms Interface - EBSCOhost Research Databases

Search Screen - Advanced Search

Database - CINAHL Plus with Full Text 3,992

**SEARCH RESULTS FOR EMBASE. LAST SEARCHED ON 23/04/19****TOTAL SEARCH RESULTS = 1299**

| #  | Searches                                                                                                                                                                                                                                                                                                                                                                                                                                                                                                                                                                                                                       | Results |
|----|--------------------------------------------------------------------------------------------------------------------------------------------------------------------------------------------------------------------------------------------------------------------------------------------------------------------------------------------------------------------------------------------------------------------------------------------------------------------------------------------------------------------------------------------------------------------------------------------------------------------------------|---------|
| 1  | determinant*.mp. or "Social Determinants of Health"/                                                                                                                                                                                                                                                                                                                                                                                                                                                                                                                                                                           | 279285  |
| 2  | factor*.mp.                                                                                                                                                                                                                                                                                                                                                                                                                                                                                                                                                                                                                    | 5433149 |
| 3  | predict*.mp.                                                                                                                                                                                                                                                                                                                                                                                                                                                                                                                                                                                                                   | 2049535 |
| 4  | Prenatal Care/ or antenatal.mp. or Pregnancy/                                                                                                                                                                                                                                                                                                                                                                                                                                                                                                                                                                                  | 747759  |
| 5  | ante natal.mp.                                                                                                                                                                                                                                                                                                                                                                                                                                                                                                                                                                                                                 | 957     |
| 6  | ante-natal.mp.                                                                                                                                                                                                                                                                                                                                                                                                                                                                                                                                                                                                                 | 957     |
| 7  | maternal health.mp. or Maternal Health Services/ or Maternal Health/ or Pregnancy/                                                                                                                                                                                                                                                                                                                                                                                                                                                                                                                                             | 719423  |
| 8  | or/1-3                                                                                                                                                                                                                                                                                                                                                                                                                                                                                                                                                                                                                         | 6997886 |
| 9  | or/4-7                                                                                                                                                                                                                                                                                                                                                                                                                                                                                                                                                                                                                         | 757867  |
| 10 | "Equipment and Supplies Utilization"/ or Drug Utilization/ or "Procedures and Techniques Utilization"/ or "Facilities and Services Utilization"/ or utilization.mp.                                                                                                                                                                                                                                                                                                                                                                                                                                                            | 369706  |
| 11 | utilisation.mp.                                                                                                                                                                                                                                                                                                                                                                                                                                                                                                                                                                                                                | 34492   |
| 12 | usage.mp.                                                                                                                                                                                                                                                                                                                                                                                                                                                                                                                                                                                                                      | 126891  |
| 13 | access.mp.                                                                                                                                                                                                                                                                                                                                                                                                                                                                                                                                                                                                                     | 454816  |
| 14 | or/10-13                                                                                                                                                                                                                                                                                                                                                                                                                                                                                                                                                                                                                       | 936915  |
| 15 | "africa south of the sahara"/ or africa, central/ or cameroon/ or central african republic/ or chad/ or congo/ or "democratic republic of the congo"/ or equatorial guinea/ or gabon/ or "sao tome and principe"/ or africa, eastern/ or burundi/ or djibouti/ or eritrea/ or ethiopia/ or kenya/ or rwanda/ or somalia/ or south sudan/ or sudan/ or tanzania/ or uganda/ or africa, southern/ or angola/ or botswana/ or lesotho/ or malawi/ or mozambique/ or namibia/ or south africa/ or swaziland/ or zambia/ or zimbabwe/ or africa, western/ or benin/ or burkina faso/ or cabo verde/ or cote d'ivoire/ or gambia/ or | 286700  |

|                                                                                                                                        |                                                                                                                                                                                                                                                                                                                                                                                                                                                                                                                                                                                                                                                                                                                                                                                            |         |
|----------------------------------------------------------------------------------------------------------------------------------------|--------------------------------------------------------------------------------------------------------------------------------------------------------------------------------------------------------------------------------------------------------------------------------------------------------------------------------------------------------------------------------------------------------------------------------------------------------------------------------------------------------------------------------------------------------------------------------------------------------------------------------------------------------------------------------------------------------------------------------------------------------------------------------------------|---------|
| ghana/ or guinea/ or guinea-bissau/ or liberia/ or mali/ or mauritania/ or niger/ or nigeria/<br>or senegal/ or sierra leone/ or togo/ |                                                                                                                                                                                                                                                                                                                                                                                                                                                                                                                                                                                                                                                                                                                                                                                            |         |
| 16                                                                                                                                     | 8 and 9 and 14 and 15                                                                                                                                                                                                                                                                                                                                                                                                                                                                                                                                                                                                                                                                                                                                                                      | 1681    |
| 17                                                                                                                                     | determinant*.mp. or "Social Determinants of Health"/                                                                                                                                                                                                                                                                                                                                                                                                                                                                                                                                                                                                                                                                                                                                       | 279285  |
| 18                                                                                                                                     | factor*.mp.                                                                                                                                                                                                                                                                                                                                                                                                                                                                                                                                                                                                                                                                                                                                                                                | 5433149 |
| 19                                                                                                                                     | predict*.mp.                                                                                                                                                                                                                                                                                                                                                                                                                                                                                                                                                                                                                                                                                                                                                                               | 2049535 |
| 20                                                                                                                                     | Prenatal Care/ or antenatal.mp. or Pregnancy/                                                                                                                                                                                                                                                                                                                                                                                                                                                                                                                                                                                                                                                                                                                                              | 747759  |
| 21                                                                                                                                     | ante natal.mp.                                                                                                                                                                                                                                                                                                                                                                                                                                                                                                                                                                                                                                                                                                                                                                             | 957     |
| 22                                                                                                                                     | ante-natal.mp.                                                                                                                                                                                                                                                                                                                                                                                                                                                                                                                                                                                                                                                                                                                                                                             | 957     |
| 23                                                                                                                                     | maternal health.mp. or Maternal Health Services/ or Maternal Health/ or Pregnancy/                                                                                                                                                                                                                                                                                                                                                                                                                                                                                                                                                                                                                                                                                                         | 719423  |
| 24                                                                                                                                     | or/17-19                                                                                                                                                                                                                                                                                                                                                                                                                                                                                                                                                                                                                                                                                                                                                                                   | 6997886 |
| 25                                                                                                                                     | or/20-23                                                                                                                                                                                                                                                                                                                                                                                                                                                                                                                                                                                                                                                                                                                                                                                   | 757867  |
| 26                                                                                                                                     | "Equipment and Supplies Utilization"/ or Drug Utilization/ or "Procedures and Techniques<br>Utilization"/ or "Facilities and Services Utilization"/ or utilization.mp.                                                                                                                                                                                                                                                                                                                                                                                                                                                                                                                                                                                                                     | 369706  |
| 27                                                                                                                                     | utilisation.mp.                                                                                                                                                                                                                                                                                                                                                                                                                                                                                                                                                                                                                                                                                                                                                                            | 34492   |
| 28                                                                                                                                     | usage.mp.                                                                                                                                                                                                                                                                                                                                                                                                                                                                                                                                                                                                                                                                                                                                                                                  | 126891  |
| 29                                                                                                                                     | access.mp.                                                                                                                                                                                                                                                                                                                                                                                                                                                                                                                                                                                                                                                                                                                                                                                 | 454816  |
| 30                                                                                                                                     | or/26-29                                                                                                                                                                                                                                                                                                                                                                                                                                                                                                                                                                                                                                                                                                                                                                                   | 936915  |
| 31                                                                                                                                     | "africa south of the sahara"/ or africa, central/ or cameroon/ or central african republic/ or<br>chad/ or congo/ or "democratic republic of the congo"/ or equatorial guinea/ or gabon/ or<br>"sao tome and principe"/ or africa, eastern/ or burundi/ or djibouti/ or eritrea/ or<br>ethiopia/ or kenya/ or rwanda/ or somalia/ or south sudan/ or sudan/ or tanzania/ or<br>uganda/ or africa, southern/ or angola/ or botswana/ or lesotho/ or malawi/ or<br>mozambique/ or namibia/ or south africa/ or swaziland/ or zambia/ or zimbabwe/ or<br>africa, western/ or benin/ or burkina faso/ or cabo verde/ or cote d'ivoire/ or gambia/ or<br>ghana/ or guinea/ or guinea-bissau/ or liberia/ or mali/ or mauritania/ or niger/ or nigeria/<br>or senegal/ or sierra leone/ or togo/ | 286700  |
| 32                                                                                                                                     | 24 and 25 and 30 and 31                                                                                                                                                                                                                                                                                                                                                                                                                                                                                                                                                                                                                                                                                                                                                                    | 1681    |
| 33                                                                                                                                     | from 32 keep 7-181                                                                                                                                                                                                                                                                                                                                                                                                                                                                                                                                                                                                                                                                                                                                                                         | 175     |

|    |                                                                                                                                                                                                                                                                                                                                                                                                                                                                                                                                                                                                                                                                                                                                                                    |         |
|----|--------------------------------------------------------------------------------------------------------------------------------------------------------------------------------------------------------------------------------------------------------------------------------------------------------------------------------------------------------------------------------------------------------------------------------------------------------------------------------------------------------------------------------------------------------------------------------------------------------------------------------------------------------------------------------------------------------------------------------------------------------------------|---------|
| 34 | 33 and 2008:2018.(sa_year).                                                                                                                                                                                                                                                                                                                                                                                                                                                                                                                                                                                                                                                                                                                                        | 100     |
| 35 | determinant*.mp. or "Social Determinants of Health"/                                                                                                                                                                                                                                                                                                                                                                                                                                                                                                                                                                                                                                                                                                               | 279285  |
| 36 | factor*.mp.                                                                                                                                                                                                                                                                                                                                                                                                                                                                                                                                                                                                                                                                                                                                                        | 5433149 |
| 37 | predict*.mp.                                                                                                                                                                                                                                                                                                                                                                                                                                                                                                                                                                                                                                                                                                                                                       | 2049535 |
| 38 | Prenatal Care/ or antenatal.mp. or Pregnancy/                                                                                                                                                                                                                                                                                                                                                                                                                                                                                                                                                                                                                                                                                                                      | 747759  |
| 39 | ante natal.mp.                                                                                                                                                                                                                                                                                                                                                                                                                                                                                                                                                                                                                                                                                                                                                     | 957     |
| 40 | ante-natal.mp.                                                                                                                                                                                                                                                                                                                                                                                                                                                                                                                                                                                                                                                                                                                                                     | 957     |
| 41 | maternal health.mp. or Maternal Health Services/ or Maternal Health/ or Pregnancy/                                                                                                                                                                                                                                                                                                                                                                                                                                                                                                                                                                                                                                                                                 | 719423  |
| 42 | or/35-37                                                                                                                                                                                                                                                                                                                                                                                                                                                                                                                                                                                                                                                                                                                                                           | 6997886 |
| 43 | or/38-41                                                                                                                                                                                                                                                                                                                                                                                                                                                                                                                                                                                                                                                                                                                                                           | 757867  |
| 44 | "Equipment and Supplies Utilization"/ or Drug Utilization/ or "Procedures and Techniques Utilization"/ or "Facilities and Services Utilization"/ or utilization.mp.                                                                                                                                                                                                                                                                                                                                                                                                                                                                                                                                                                                                | 369706  |
| 45 | utilisation.mp.                                                                                                                                                                                                                                                                                                                                                                                                                                                                                                                                                                                                                                                                                                                                                    | 34492   |
| 46 | usage.mp.                                                                                                                                                                                                                                                                                                                                                                                                                                                                                                                                                                                                                                                                                                                                                          | 126891  |
| 47 | access.mp.                                                                                                                                                                                                                                                                                                                                                                                                                                                                                                                                                                                                                                                                                                                                                         | 454816  |
| 48 | or/44-47                                                                                                                                                                                                                                                                                                                                                                                                                                                                                                                                                                                                                                                                                                                                                           | 936915  |
| 49 | "africa south of the sahara"/ or africa, central/ or cameroon/ or central african republic/ or chad/ or congo/ or "democratic republic of the congo"/ or equatorial guinea/ or gabon/ or "sao tome and principe"/ or africa, eastern/ or burundi/ or djibouti/ or eritrea/ or ethiopia/ or kenya/ or rwanda/ or somalia/ or south sudan/ or sudan/ or tanzania/ or uganda/ or africa, southern/ or angola/ or botswana/ or lesotho/ or malawi/ or mozambique/ or namibia/ or south africa/ or swaziland/ or zambia/ or zimbabwe/ or africa, western/ or benin/ or burkina faso/ or cabo verde/ or cote d'ivoire/ or gambia/ or ghana/ or guinea/ or guinea-bissau/ or liberia/ or mali/ or mauritania/ or niger/ or nigeria/ or senegal/ or sierra leone/ or togo/ | 286700  |
| 50 | 42 and 43 and 48 and 49                                                                                                                                                                                                                                                                                                                                                                                                                                                                                                                                                                                                                                                                                                                                            | 1681    |
| 51 | 50 and 2008:2018.(sa_year).                                                                                                                                                                                                                                                                                                                                                                                                                                                                                                                                                                                                                                                                                                                                        | 1299    |

## References

- 1101 Sorensen B.L., Elsass P., Rasch V., Bruun Nielsen B., Massawe S. Implementing ALSO in an African setting. *Acta Obstet. Gynecol. Scand.* [Internet]. June 2012 91(SUPPL. 159):31. In: Embase Available from  
· <http://ovidsp.ovid.com/ovidweb.cgi?T=JS&PAGE=reference&D=emed13&NEWS=N&AN=70796256>
- 1102 Blom A., Cloete M., Hendricks N., Joubert B., Roux S., Barnard R., Snell C., Marais A.-S., Seedat S., Gossage J.P., Blankenship J., May P.A. High risk pregnant women and case management: Efficacy of prevention in a community with the highest fetal alcohol syndrome prevalence in the world. *Alcohol. Clin. Exp. Res.* [Internet]. June 2012 36(SUPPL. 1):213A. In: Embase Available from  
· <http://ovidsp.ovid.com/ovidweb.cgi?T=JS&PAGE=reference&D=emed13&NEWS=N&AN=70790586>
- 1103 Exavery A. Relationship between contraceptive failure and contraceptive discontinuation among 15 - 49 year-old non-nulligravid women in rural Tanzania. *Eur. J. Contracept. Reprod. Health Care* [Internet]. June 2012 17(SUPPL. 1):S73-S74. In: Embase Available from  
· <http://ovidsp.ovid.com/ovidweb.cgi?T=JS&PAGE=reference&D=emed13&NEWS=N&AN=70747972>
- 1104 Pham K., Jacquet G., Vu A. The use of lot quality assurance sampling in the assessment of health and water/sanitation services in a complex humanitarian emergency. *Acad. Emerg. Med.* [Internet]. April 2012 19(SUPPL. 1):S305-S306. In: Embase Available from  
· <http://ovidsp.ovid.com/ovidweb.cgi?T=JS&PAGE=reference&D=emed13&NEWS=N&AN=70745743>
- 1105 Shija A.E., Msovela J., Mboera L.E.G. Maternal health in fifty years of Tanzania independence: Challenges and opportunities of reducing maternal mortality. *Tanzan. J. Health Res.* [Internet]. 2011 13(5 SUPPL.ISS):1-15. In: Embase Available from  
· <http://ovidsp.ovid.com/ovidweb.cgi?T=JS&PAGE=reference&D=emed12&NEWS=N&AN=364585607>
- 1106 Yusuff K.B., Omarusehe L.-D. Determinants of self medication practices among pregnant women in Ibadan, Nigeria. *Int. J. Clin. Pharm.* [Internet]. October 2011 33(5):868-875. In: Embase Available from  
· <http://ovidsp.ovid.com/ovidweb.cgi?T=JS&PAGE=reference&D=emed12&NEWS=N&AN=51600561>
- 1107 Hussain A., Moodley D., Naidoo S., Esterhuizen T.M. Pregnant women's access to PMTCT and ART services in South Africa and implications for universal antiretroviral treatment. *PLoS ONE* [Internet]. 05 Dec 2011 6(12):no pagination. In: Embase Available from  
· <http://ovidsp.ovid.com/ovidweb.cgi?T=JS&PAGE=reference&D=emed12&NEWS=N&AN=363029600>

- 1108 Dhont N., Luchters S., Muvunyi C., Vyankandondera J., De Naeyer L., Temmerman M., van de Wijgert J. The risk factor profile of women with secondary infertility: An unmatched case-control study in Kigali, Rwanda. *BMC Women's Health* [Internet]. 24 Jun 2011 11 no pagination. In: Embase Available from <http://ovidsp.ovid.com/ovidweb.cgi?T=JS&PAGE=reference&D=emed12&NEWS=N&AN=51496980>
- 1109 Ujuju C., Anyanti J., Adebayo S.B., Muhammad F., Oluigbo O., Gofwan A. Religion, culture and male involvement in the use of the Standard Days Method: Evidence from Enugu and Katsina states of Nigeria. *Int. Nurs. Rev.* [Internet]. December 2011 58(4):484-490. In: Embase Available from <http://ovidsp.ovid.com/ovidweb.cgi?T=JS&PAGE=reference&D=emed12&NEWS=N&AN=51461158>
- 1110 O'Meara W., Smith N., Ekal E., Cole D., Ndege S. Spatial distribution of bednet coverage under routine distribution through the public health sector in a rural district in kenya. *PLoS ONE* [Internet]. 12 Oct 2011 6(10):no pagination. In: Embase Available from <http://ovidsp.ovid.com/ovidweb.cgi?T=JS&PAGE=reference&D=emed12&NEWS=N&AN=362738073>
- 1111 Ochako R., Fotso J.-C., Ikamari L., Khasakhala A. Utilization of maternal health services among young women in Kenya: Insights from the Kenya Demographic and Health Survey, 2003. *BMC Pregnancy Childbirth* [Internet]. 10 Jan 2011 11 no pagination. In: Embase Available from <http://ovidsp.ovid.com/ovidweb.cgi?T=JS&PAGE=reference&D=emed12&NEWS=N&AN=51227444>
- 1112 Ekabua J.E., Ekabua K.J., Odusolu P., Agan T.U., Iklaki C.U., Etokidem A.J. Awareness of birth preparedness and complication readiness in southeastern Nigeria. *ISRN Obstet. Gynecol.* [Internet]. 2011 no pagination. In: Embase Available from <http://ovidsp.ovid.com/ovidweb.cgi?T=JS&PAGE=reference&D=emed12&NEWS=N&AN=364545411>
- 1113 Kinuthia J., Kiarie J.N., Farquhar C., Richardson B.A., Nduati R., Mbori-Ngacha D., John-Stewart G. Uptake of prevention of mother to child transmission interventions in Kenya: Healthsystems are more influential than stigma. *J. Int. AIDS Soc.* [Internet]. 2011 14(1):no pagination. In: Embase Available from <http://ovidsp.ovid.com/ovidweb.cgi?T=JS&PAGE=reference&D=emed12&NEWS=N&AN=364542288>
- 1114 Mekonnen W., Worku A. Determinants of fertility in rural Ethiopia: the case of Butajira Demographic Surveillance System (DSS). *BMC Public Health* [Internet]. 2011 11 782. In: Embase Available from <http://ovidsp.ovid.com/ovidweb.cgi?T=JS&PAGE=reference&D=emed12&NEWS=N&AN=560045833>

- 1115 Todd C.S., Stibich M.A., Laher F., Malta M.S., Bastos F.I., Imbuki K., Shaffer D.N., Sinei S.K., Gray G.E. Influence of culture on contraceptive utilization among HIV-positive women in Brazil, Kenya, and South Africa. *AIDS Behav* [Internet]. Feb 2011 15(2):454-468. In: Embase Available from <http://ovidsp.ovid.com/ovidweb.cgi?T=JS&PAGE=reference&D=emed12&NEWS=N&AN=560011896>
- 1116 Wand H., Ramjee G. Combined impact of sexual risk behaviors for HIV seroconversion among women in Durban, South Africa: implications for prevention policy and planning. *AIDS Behav* [Internet]. Feb 2011 15(2):479-486. In: Embase Available from <http://ovidsp.ovid.com/ovidweb.cgi?T=JS&PAGE=reference&D=emed12&NEWS=N&AN=560011891>
- 1117 Chote A.A., Koopmans G.T., Redekop W.K., de Groot C.J., Hoefman R.J., Jaddoe V.W., Hofman A., Steegers E.A., Mackenbach J.P., Trappenburg M., Foets M. Explaining ethnic differences in late antenatal care entry by predisposing, enabling and need factors in The Netherlands. The Generation R Study. *Matern Child Health J* [Internet]. Aug 2011 15(6):689-699. In: Embase Available from <http://ovidsp.ovid.com/ovidweb.cgi?T=JS&PAGE=reference&D=emed12&NEWS=N&AN=560006011>
- 1118 Curtis S., Evens E., Sambisa W. Contraceptive discontinuation and unintended pregnancy: An imperfect relationship. *Int. Perspect. Sexual Reprod. Health* [Internet]. June 2011 37(2):58-66. In: Embase Available from <http://ovidsp.ovid.com/ovidweb.cgi?T=JS&PAGE=reference&D=emed12&NEWS=N&AN=362404612>
- 1119 Mirkuzie A.H., Sisay M.M., Moland K.M., Astrom A.N. Applying the theory of planned behaviour to explain HIV testing in antenatal settings in Addis Ababa - a cohort study. *BMC Health Serv Res* [Internet]. 2011 11 196. In: Embase Available from <http://ovidsp.ovid.com/ovidweb.cgi?T=JS&PAGE=reference&D=emed12&NEWS=N&AN=560031903>
- 1120 Nuwaha F., Babirye J., Ayiga N. Why the increase in under five mortality in Uganda from 1995 to 2000? A retrospective analysis. *BMC Public Health* [Internet]. 2011 11 725. In: Embase Available from <http://ovidsp.ovid.com/ovidweb.cgi?T=JS&PAGE=reference&D=emed12&NEWS=N&AN=560024470>
- 1121 Pell C., Straus L., Andrew E.V.W., Menaca A., Pool R. Social and cultural factors affecting uptake of interventions for malaria in pregnancy in Africa: A systematic review of the qualitative research. *PLoS ONE* [Internet]. 2011 6(7):no pagination. In: Embase Available from <http://ovidsp.ovid.com/ovidweb.cgi?T=JS&PAGE=reference&D=emed12&NEWS=N&AN=362184585>



- 1122 Flynn P.M., Foster E.M., Brost B.C. Indicators of acculturation related to Somali refugee women's birth outcomes in Minnesota. *J Immigr Minor Health* [Internet]. Apr 2011 13(2):224-231. In: Embase Available from  
· <http://ovidsp.ovid.com/ovidweb.cgi?T=JS&PAGE=reference&D=emed12&NEWS=N&AN=362102796>
- 1123 Rwenge M.J., Tchamgoue-Nguemaleu H.B. [Social factors associated with the use of obstetrical health care services among Cameroonian teenagers]. [in French] *Afr J Reprod Health* [Internet]. Sep 2011 15(3):81-92. In: Embase Available from  
· <http://ovidsp.ovid.com/ovidweb.cgi?T=JS&PAGE=reference&D=emed12&NEWS=N&AN=364999276>
- 1124 Igboanugo G.M., Martin C.H. What are pregnant women in a rural Niger Delta community's perceptions of conventional maternity service provision? An exploratory qualitative study. *Afr J Reprod Health* [Internet]. Sep 2011 15(3):59-72. In: Embase Available from  
· <http://ovidsp.ovid.com/ovidweb.cgi?T=JS&PAGE=reference&D=emed12&NEWS=N&AN=364999274>
- 1125 Regassa N. Antenatal and postnatal care service utilization in Southern Ethiopia: A population-based study. *Afr. Health Sci.* [Internet]. 2011 11(3):390-397. In: Embase Available from  
· <http://ovidsp.ovid.com/ovidweb.cgi?T=JS&PAGE=reference&D=emed12&NEWS=N&AN=368011311>
- 1126 Moore B.M., Alex-Hart B.A., George I.O. Utilization of health care services by pregnant mothers during delivery: a community based study in Nigeria. *East Afr J Public Health* [Internet]. Mar 2011 8(1):49-51. In: Embase Available from  
· <http://ovidsp.ovid.com/ovidweb.cgi?T=JS&PAGE=reference&D=emed12&NEWS=N&AN=362997926>
- 1127 Nigatu T., Woldegebriel Y. Analysis of the Prevention of Mother-to-Child Transmission (PMTCT) Service utilization in Ethiopia: 2006-2010. *Reprod. Health* [Internet]. 2011 8(1):no pagination. In: Embase Available from  
· <http://ovidsp.ovid.com/ovidweb.cgi?T=JS&PAGE=reference&D=emed12&NEWS=N&AN=361777560>
- 1128 Foerster S., Cords M., Monfort S.L. Social behavior, foraging strategies, and fecal glucocorticoids in female blue monkeys (*Cercopithecus mitis*): Potential fitness benefits of high rank in a forest guenon. *Am. J. Primatol.* [Internet]. September 2011 73(9):870-882. In: Embase Available from  
· <http://ovidsp.ovid.com/ovidweb.cgi?T=JS&PAGE=reference&D=emed12&NEWS=N&AN=51380151>
- 1129 Hadley M.B., Tuba M. Local problems; Local solutions: An innovative approach to investigating and addressing causes of maternal deaths in Zambia's Copperbelt. *Reprod. Health* [Internet]. 2011 8(1):no pagination. In: Embase Available from

- <http://ovidsp.ovid.com/ovidweb.cgi?T=JS&PAGE=reference&D=emed12&NEWS=N&AN=51441896>
- 1130 Yohannes S., Wondafrash M., Abera M., Girma E. Duration and determinants of birth interval among women of child bearing age in Southern Ethiopia. BMC Pregnancy Childbirth [Internet]. 20 May 2011 11 no pagination. In: Embase Available from  
· <http://ovidsp.ovid.com/ovidweb.cgi?T=JS&PAGE=reference&D=emed12&NEWS=N&AN=51440178>
- 1131 Zere E., Oluwole D., Kirigia J.M., Mwikisa C.N., Mbeeli T. Inequities in skilled attendance at birth in Namibia: A decomposition analysis. BMC Pregnancy Childbirth [Internet]. 14 May 2011 11 no pagination. In: Embase Available from  
· <http://ovidsp.ovid.com/ovidweb.cgi?T=JS&PAGE=reference&D=emed12&NEWS=N&AN=51428208>
- 1132 Fadupin G.T., Pikuda Y.C. Maternal weight gain and pregnancy outcome in adolescent girls in Ibadan, Nigeria. Afr J Med Med Sci [Internet]. Sep 2011 40(3):197-205. In: Embase Available from  
· <http://ovidsp.ovid.com/ovidweb.cgi?T=JS&PAGE=reference&D=emed12&NEWS=N&AN=364651365>
- 1133 Wanjira C., Mwangi M., Mathenge E., Mbugua G., Ng'ang'a Z. Delivery practices and associated factors among mothers seeking child welfare services in selected health facilities in Nyandarua South District, Kenya. BMC Public Health [Internet]. 2011 11 360. In: Embase Available from  
· <http://ovidsp.ovid.com/ovidweb.cgi?T=JS&PAGE=reference&D=emed12&NEWS=N&AN=362791711>
- 1134 Ibor U.W., Anjorin O.A., Ita A.E., Otu M.A., Bassey T.I. Utilization of antenatal care in Ibadan North Local Government Area, Oyo State, Nigeria. Trends Med. Res. [Internet]. 2011 6(4):273-280. In: Embase Available from  
· <http://ovidsp.ovid.com/ovidweb.cgi?T=JS&PAGE=reference&D=emed12&NEWS=N&AN=364503754>
- 1135 Talukder M., Rob U. Equity in access to maternal and child health services in five developing countries: What works. Int. Q. Community Health Educ. [Internet]. 2010-2011 31(2):119-131. In: Embase Available from  
· <http://ovidsp.ovid.com/ovidweb.cgi?T=JS&PAGE=reference&D=emed12&NEWS=N&AN=362356240>
- 1136 Gebremedhin S., Enquselassie F., Umata M. Prevalence of prenatal zinc deficiency and its association with socio-demographic, dietary and health care related factors in rural Sidama, Southern Ethiopia: a cross-sectional study. BMC Public Health [Internet]. 2011 11 898. In: Embase Available from

- <http://ovidsp.ovid.com/ovidweb.cgi?T=JS&PAGE=reference&D=emed12&NEWS=N&AN=560041908>
- 1137 Hong R., Ayad M., Ngabo F. Being insured improves safe delivery practices in Rwanda. *J Community Health* [Internet]. Oct 2011 36(5):779-784. In: Embase Available from <http://ovidsp.ovid.com/ovidweb.cgi?T=JS&PAGE=reference&D=emed12&NEWS=N&AN=560002246>
- 1138 Kruger C., Olsen O.E., Mighay E., Ali M. Where do women give birth in rural Tanzania?. *Rural Remote Health* [Internet]. 2011 Jul-Sep 11(3):1791. In: Embase Available from <http://ovidsp.ovid.com/ovidweb.cgi?T=JS&PAGE=reference&D=emed12&NEWS=N&AN=560000312>
- 1139 Garba M., Nayama M., Alio A.P., Holloway M.L., Hamisu B.S., Salihu H.M. Maternal mortality in Niger: a retrospective study in a high risk maternity. *Afr J Med Med Sci* [Internet]. Dec 2011 40(4):393-397. In: Embase Available from <http://ovidsp.ovid.com/ovidweb.cgi?T=JS&PAGE=reference&D=emed12&NEWS=N&AN=365406966>
- 1140 Binkin N., Chopra M., Simen-Kapeu A., Westhof D. Do improvements in outreach, clinical, and family and community-based services predict improvements in child survival? An analysis of serial cross-sectional national surveys. *BMC Public Health* [Internet]. 2011 11 456. In: Embase Available from <http://ovidsp.ovid.com/ovidweb.cgi?T=JS&PAGE=reference&D=emed12&NEWS=N&AN=560018152>
- 1141 Decker M., Constantine N.A. Factors associated with contraceptive use in Angola. *Afr J Reprod Health* [Internet]. Dec 2011 15(4):68-77. In: Embase Available from <http://ovidsp.ovid.com/ovidweb.cgi?T=JS&PAGE=reference&D=emed12&NEWS=N&AN=364914952>
- 1142 Pearson L., Gandhi M., Admasu K., Keyes E.B. User fees and maternity services in Ethiopia. *Int. J. Gynecol. Obstet.* [Internet]. December 2011 115(3):310-315. In: Embase Available from <http://ovidsp.ovid.com/ovidweb.cgi?T=JS&PAGE=reference&D=emed12&NEWS=N&AN=51656668>
- 1143 Fawole A.O., Shah A., Tongo O., Dara K., El-Ladan A.M., Umezulike A.C., Alu F.E., Eniayewun A.B., Fabanwo A.O., Adewunmi A.A., Adegbola O., Adebayo A.A., Obaitan F.O., Onala O.E., Usman Y., Sullayman A.O., Kailani S., Sa'id M. Determinants of perinatal mortality in Nigeria. *Int. J. Gynecol. Obstet.* [Internet]. July 2011 114(1):37-42. In: Embase Available from <http://ovidsp.ovid.com/ovidweb.cgi?T=JS&PAGE=reference&D=emed12&NEWS=N&AN=51369755>

- Bangser M., Mehta M., Singer J., Daly C., Kamugumya C., Mwangomale A. Childbirth experiences of women with obstetric fistula in Tanzania and Uganda and their implications for fistula program development. *Int. Urogynecol. J. Pelvic Floor Dysfunct.* [Internet]. January 2011 1144 22(1):91-98. In: Embase Available from  
http://ovidsp.ovid.com/ovidweb.cgi?T=JS&PAGE=reference&D=emed12&NEWS=N&AN=361120643
- Ibekwe P.C. Need to intensify emergency obstetric care services in Nigeria. *J. Public Health Afr.* 1145 [Internet]. 2011 2(2):141-142. In: Embase Available from  
http://ovidsp.ovid.com/ovidweb.cgi?T=JS&PAGE=reference&D=emed12&NEWS=N&AN=611081580
- Richard F., Hercot D., Ouedraogo C., Delvaux T., Samake S., van Olmen J., Conombo G., Hammonds R., Vandemoortele J. Sub-Saharan Africa and the health MDGs: The need to move 1146 beyond the "quick impact" model. *Reprod. Health Matters* [Internet]. November 2011 19(38):42-55. In: Embase Available from  
http://ovidsp.ovid.com/ovidweb.cgi?T=JS&PAGE=reference&D=emed12&NEWS=N&AN=363008650
- Parker C.B., Hogue C.J.R., Koch M.A., Willinger M., Reddy U.M., Thorsten V.R., Dudley D.J., Silver R.M., Coustan D., Saade G.R., Conway D., Varner M.W., Stoll B., Pinar H., Bukowski R., Carpenter M., Goldenberg R. Stillbirth Collaborative Research Network: Design, methods and recruitment 1147 experience. *Paediatr. Perinat. Epidemiol.* [Internet]. September 2011 25(5):425-435. In: Embase Available from  
http://ovidsp.ovid.com/ovidweb.cgi?T=JS&PAGE=reference&D=emed12&NEWS=N&AN=51551846
- Bbaale E. Factors influencing the utilisation of antenatal care content in Uganda. *Australas. Med. J.* 1148 [Internet]. 2011 4(9):516-526. In: Embase Available from  
http://ovidsp.ovid.com/ovidweb.cgi?T=JS&PAGE=reference&D=emed12&NEWS=N&AN=362861768
- Hallett T.B., Gregson S., Dube S., Mapfeka E.S., Mugurungi O., Garnett G.P. Estimating the 1149 resources required in the roll-out of universal access to antiretroviral treatment in Zimbabwe. *Sex. Transm. Infect.* [Internet]. December 2011 87(7):621-628. In: Embase Available from  
http://ovidsp.ovid.com/ovidweb.cgi?T=JS&PAGE=reference&D=emed12&NEWS=N&AN=51460946
- Palamuleni M. Determinants of non-institutional deliveries in Malawi. *Malawi Med. J.* [Internet]. 1150 2011 23(4):104-108. In: Embase Available from  
http://ovidsp.ovid.com/ovidweb.cgi?T=JS&PAGE=reference&D=emed12&NEWS=N&AN=364537759

- 1151 Osaikhuwumwan J.A., Ande A.B. Reappraisal of ruptured uterus in an urban tertiary center in the Niger-delta region of Nigeria. *J. Matern.-Fetal Neonatal Med.* [Internet]. April 2011 24(4):559-563. In: Embase Available from  
· <http://ovidsp.ovid.com/ovidweb.cgi?T=JS&PAGE=reference&D=emed12&NEWS=N&AN=361398981>
- 1152 Antai D. Regional inequalities in under-5 mortality in Nigeria: A population-based analysis of individual- and community-level determinants. *Popul. Health Metr.* [Internet]. 09 Mar 2011 9 no pagination. In: Embase Available from  
· <http://ovidsp.ovid.com/ovidweb.cgi?T=JS&PAGE=reference&D=emed12&NEWS=N&AN=51317637>
- 1153 Sprague C., Chersich M.F., Black V. Health system weaknesses constrain access to PMTCT and maternal HIV services in South Africa: A qualitative enquiry. *AIDS Res. Ther.* [Internet]. 03 Mar 2011 8 no pagination. In: Embase Available from  
· <http://ovidsp.ovid.com/ovidweb.cgi?T=JS&PAGE=reference&D=emed12&NEWS=N&AN=51308235>
- 1154 Kroll J., Yusuf A.I., Fujiwara K. Psychoses, PTSD, and depression in Somali refugees in Minnesota. *Soc Psychiatry Psychiatr Epidemiol* [Internet]. Jun 2011 46(6):481-493. In: Embase Available from  
· <http://ovidsp.ovid.com/ovidweb.cgi?T=JS&PAGE=reference&D=emed12&NEWS=N&AN=560075706>
- 1155 Sjoveian S., Vangen S., Mukwege D., Onsrud M. Surgical outcome of obstetric fistula: A retrospective analysis of 595 patients. *Acta Obstet. Gynecol. Scand.* [Internet]. July 2011 90(7):753-760. In: Embase Available from  
· <http://ovidsp.ovid.com/ovidweb.cgi?T=JS&PAGE=reference&D=emed12&NEWS=N&AN=362051788>
- 1156 Requejo J.H., Merialdi M., Bustreo F. Improving global maternal health: Progress, challenges, and promise. *Curr. Opin. Obstet. Gynecol.* [Internet]. December 2011 23(6):465-470. In: Embase Available from  
· <http://ovidsp.ovid.com/ovidweb.cgi?T=JS&PAGE=reference&D=emed12&NEWS=N&AN=51688547>
- 1157 Aremu O., Lawoko S., Dalal K. Neighborhood socioeconomic disadvantage, individual wealth status and patterns of delivery care utilization in Nigeria: A multilevel discrete choice analysis. *Int. J. Womens Health* [Internet]. 2011 3(1):167-174. In: Embase Available from  
· <http://ovidsp.ovid.com/ovidweb.cgi?T=JS&PAGE=reference&D=emed12&NEWS=N&AN=363132914>
- 1158 Bradley E., Thompson J.W., Byam P., Webster T.R., Zerihun A., Alpern R., Herrin J., Abebe Y., Curry L. Access and quality of rural healthcare: Ethiopian Millennium Rural Initiative. *Int. J. Qual. Health Care* [Internet]. June 2011 23(3):222-230. In: Embase Available from  
·

- <http://ovidsp.ovid.com/ovidweb.cgi?T=JS&PAGE=reference&D=emed12&NEWS=N&AN=361771027>
- 1159 Tamuno I., Omole-Ohonsi A., Fadare J. Use of herbal medicine among pregnant women attending a tertiary hospital in northern Nigeria. *Internet J. Gynecol. Obstet.* [Internet]. 2011 15(2):no pagination. In: Embase Available from  
· <http://ovidsp.ovid.com/ovidweb.cgi?T=JS&PAGE=reference&D=emed12&NEWS=N&AN=362772410>
- 1160 Iriemenam N.C., Dosunmu A.O., Oyibo W.A., Fagbenro-Beyioku A.F. Knowledge, attitude, perception of malaria and evaluation of malaria parasitaemia among pregnant women attending antenatal care clinic in metropolitan Lagos, Nigeria. *J. Vector Borne Dis.* [Internet]. March 2011 48(1):12-17. In: Embase Available from  
· <http://ovidsp.ovid.com/ovidweb.cgi?T=JS&PAGE=reference&D=emed12&NEWS=N&AN=361490139>
- 1161 Abaynew Y., Deribew A., Deribe K. Factors associated with late presentation to HIV/AIDS care in South Wollo Zone Ethiopia: A case-control study. *AIDS Res. Ther.* [Internet]. 28 Feb 2011 8 no pagination. In: Embase Available from  
· <http://ovidsp.ovid.com/ovidweb.cgi?T=JS&PAGE=reference&D=emed12&NEWS=N&AN=51301526>
- 1162 Cook R.E., Ciampa P.J., Sidat M., Blevins M., Burlison J., Davidson M.A., Arroz J.A., Vergara A.E., Vermund S.H., Moon T.D. Predictors of successful early infant diagnosis of HIV in a rural district hospital in zambia, mozambique. *J. Acquired Immune Defic. Syndr.* [Internet]. 01 Apr 2011 56(4):e104-e109. In: Embase Available from  
· <http://ovidsp.ovid.com/ovidweb.cgi?T=JS&PAGE=reference&D=emed12&NEWS=N&AN=51250219>
- 1163 Bbaale E. Factors influencing timing and frequency of antenatal care in Uganda. *Australas. Med. J.* [Internet]. 2011 4(8):431-438. In: Embase Available from  
· <http://ovidsp.ovid.com/ovidweb.cgi?T=JS&PAGE=reference&D=emed12&NEWS=N&AN=362503820>
- 1164 De Allegri M., Ridde V., Louis V.R., Sarker M., Tiendrebeogo J., Ye M., Muller O., Jahn A. Determinants of utilisation of maternal care services after the reduction of user fees: A case study from rural Burkina Faso. *Health Policy* [Internet]. March 2011 99(3):210-218. In: Embase Available from  
· <http://ovidsp.ovid.com/ovidweb.cgi?T=JS&PAGE=reference&D=emed12&NEWS=N&AN=51135812>
- 1165 Vidyasagar D., Velaphi S., Bhat V.B. Surfactant replacement therapy in developing countries. *Neonatology* [Internet]. June 2011 99(4):355-366. In: Embase Available from

- <http://ovidsp.ovid.com/ovidweb.cgi?T=JS&PAGE=reference&D=emed12&NEWS=N&AN=362027819>
- 1166 Jeremiah I., Okike O., Akani C. The prevalence of serum immunoglobulin g antibody to chlamydia trachomatis in subfertile women presenting at the university of port harcourt teaching hospital, Nigeria. *Int. J. Biomed. Sci.* [Internet]. June 15,2011 7(2):120-124. In: Embase Available from  
· <http://ovidsp.ovid.com/ovidweb.cgi?T=JS&PAGE=reference&D=emed12&NEWS=N&AN=362020846>
- 1167 Mark J., Wesler L., Oswald C., Leandre F., Nevil P., Bertrand D., Bertrand J., Boehm F., Smith Fawzi M.C. Economic risk factors for syphilis infection among pregnant women in rural Haiti. *Sex. Transm. Infect.* [Internet]. July 2011 87(SUPPL. 1):A263. In: Embase Available from  
· <http://ovidsp.ovid.com/ovidweb.cgi?T=JS&PAGE=reference&D=emed12&NEWS=N&AN=70728862>
- 1168 Adu-Sarkodie Y., Mensah P., Opoku B.K., Mayaud P., Peeling R. Prevalence of syphilis in antenatal clinic attenders and associated risk factors. *Sex. Transm. Infect.* [Internet]. July 2011 87(SUPPL. 1):A119. In: Embase Available from  
· <http://ovidsp.ovid.com/ovidweb.cgi?T=JS&PAGE=reference&D=emed12&NEWS=N&AN=70728524>
- 1169 Haddad L., Cwiak C., Jamieson D., Feldacker C., Hosseinipour M., Hoffman I., Bryant A., Stuart G., Phiri S. Condom use among hiv-positive women desiring family planning in Lilongwe, Malawi. *Contraception* [Internet]. September 2011 84(3):324-325. In: Embase Available from  
· <http://ovidsp.ovid.com/ovidweb.cgi?T=JS&PAGE=reference&D=emed12&NEWS=N&AN=70622586>
- 1170 Parisotto M., Guerra B., Rizzo N., Pietra V., Sempore J., Buelli F., Cervi F., Autino B., Simapore J., Pignatelli S., Sanogo K., Castelli F. Impact of adherence to the PMTCT program at Saint Camille medical centre in Ouagadougou, Burkina Faso. *Trop. Med. Int. Health* [Internet]. October 2011 16(SUPPL. 1):313-314. In: Embase Available from  
· <http://ovidsp.ovid.com/ovidweb.cgi?T=JS&PAGE=reference&D=emed12&NEWS=N&AN=70589827>
- 1171 Escudero P. Global access to care for women and children. *Trop. Med. Int. Health* [Internet]. October 2011 16(SUPPL. 1):35-36. In: Embase Available from  
· <http://ovidsp.ovid.com/ovidweb.cgi?T=JS&PAGE=reference&D=emed12&NEWS=N&AN=70588965>
- 1172 Kolaczinski J.H., Kolaczinski K., Kyabayinze D., Strachan D., Temperley M., Wijayanandana N., Kilian A. Research Costs and effects of two public sector delivery channels for long-lasting insecticidal nets in Uganda. *Malar. J.* [Internet]. 20 Apr 2010 9(1):no pagination. In: Embase Available from

<http://ovidsp.ovid.com/ovidweb.cgi?T=JS&PAGE=reference&D=emed11&NEWS=N&AN=50882971>

- Mubyazi G.M., Bloch P., Magnussen P., Olsen O.E., Byskov J., Hansen K.S., Bygbjerg I.C. Women's experiences and views about costs of seeking malaria chemoprevention and other antenatal services: A qualitative study from two districts in rural Tanzania. *Malaria J.* [Internet]. 2010 9(1):no pagination. In: Embase Available from <http://ovidsp.ovid.com/ovidweb.cgi?T=JS&PAGE=reference&D=emed11&NEWS=N&AN=50843579>

- Kaaya S.F., Mbwambo J.K., Kilonzo G.P., Van Den Borne H., Leshabari M.T., Smith Fawzi M.C., Schaalma H. Socio-economic and partner relationship factors associated with antenatal depressive morbidity among pregnant women in Dar es Salaam, Tanzania. *Tanzan. J. Health Res.* [Internet]. 2010 12(1):3. In: Embase Available from <http://ovidsp.ovid.com/ovidweb.cgi?T=JS&PAGE=reference&D=emed11&NEWS=N&AN=361710427>

- Larsen D.A., Keating J., Miller J., Bennett A., Changufu C., Katebe C., Eisele T.P. Barriers to insecticide-treated mosquito net possession 2 years after a mass free distribution campaign in luangwa district, Zambia. *PLoS ONE* [Internet]. 2010 5(11):no pagination. In: Embase Available from <http://ovidsp.ovid.com/ovidweb.cgi?T=JS&PAGE=reference&D=emed11&NEWS=N&AN=360084491>

- Agida E.T., Adeka B.I., Jibril K.A. Pregnancy outcome in eclamptics at the University of Abuja Teaching Hospital, Gwagwalada, Abuja: a 3 year review. *Niger J Clin Pract* [Internet]. Dec 2010 13(4):394-398. In: Embase Available from <http://ovidsp.ovid.com/ovidweb.cgi?T=JS&PAGE=reference&D=emed11&NEWS=N&AN=362751455>

- Diarra I., Camara S., Maiga M.K. [Assessment of the use of partogram at the district maternity hospital of commune II in Bamako area]. [in French] *Mali Med* [Internet]. 2010 25(2):36-41. In: Embase Available from <http://ovidsp.ovid.com/ovidweb.cgi?T=JS&PAGE=reference&D=emed11&NEWS=N&AN=362612508>

- Chukwuocha U.M., Dozie I.N., Onwuliri C.O., Ukaga C.N., Nwoke B.E., Nwankwo B.O., Nwoke E.A., Nwaokoro J.C., Nwoga K.S., Udujih O.G., Iwuala C.C., Ohaji E.T., Morakinyo O.M., Adindu B.C. Perceptions on the use of insecticide treated nets in parts of the Imo River Basin, Nigeria: implications for preventing malaria in pregnancy. *Afr J Reprod Health* [Internet]. Mar 2010 14(1):117-128. In: Embase Available from <http://ovidsp.ovid.com/ovidweb.cgi?T=JS&PAGE=reference&D=emed11&NEWS=N&AN=359393195>



- 1179 Utoo B.T., Mutihir T.J., Utoo P.M. Knowledge, attitude and practice of family planning methods among women attending antenatal clinic in Jos, North-central Nigeria. *Niger J Med* [Internet]. 2010 Apr-Jun 19(2):214-218. In: Embase Available from  
· <http://ovidsp.ovid.com/ovidweb.cgi?T=JS&PAGE=reference&D=emed11&NEWS=N&AN=359393046>
- 1180 Chaibva C.N., Ehlers V.J., Roos J.H. Midwives' perceptions about adolescents' utilisation of public prenatal services in Bulawayo, Zimbabwe. *Midwifery* [Internet]. December 2010 26(6):e16-e20. In: Embase Available from  
· <http://ovidsp.ovid.com/ovidweb.cgi?T=JS&PAGE=reference&D=emed11&NEWS=N&AN=50436088>
- 1181 Anyangu A.S. Prevalence and factors influencing consistent condom use among sexually active young people attending a youth friendly centre in Kenya, 2008. *East Afr J Public Health* [Internet]. Dec 2010 7(4):300-304. In: Embase Available from  
· <http://ovidsp.ovid.com/ovidweb.cgi?T=JS&PAGE=reference&D=emed11&NEWS=N&AN=560034215>
- 1182 Carolan M. Pregnancy health status of sub-Saharan refugee women who have resettled in developed countries: A review of the literature. *Midwifery* [Internet]. August 2010 26(4):407-414. In: Embase Available from  
· <http://ovidsp.ovid.com/ovidweb.cgi?T=JS&PAGE=reference&D=emed11&NEWS=N&AN=50378086>
- 1183 Pembe A.B., Carlstedt A., Urassa D.P., Lindmark G., Nystrom L., Darj E. Effectiveness of maternal referral system in a rural setting: a case study from Rufiji district, Tanzania. *BMC Health Serv Res* [Internet]. 2010 10 326. In: Embase Available from  
· <http://ovidsp.ovid.com/ovidweb.cgi?T=JS&PAGE=reference&D=emed11&NEWS=N&AN=360304858>
- 1184 Yakong V.N., Rush K.L., Bassett-Smith J., Bottorff J.L., Robinson C. Women's experiences of seeking reproductive health care in rural Ghana: Challenges for maternal health service utilization. *J. Adv. Nurs.* [Internet]. November 2010 66(11):2431-2441. In: Embase Available from  
· <http://ovidsp.ovid.com/ovidweb.cgi?T=JS&PAGE=reference&D=emed11&NEWS=N&AN=360045209>
- 1185 Wagbatsoma V.A., Aigbe E.E. ITN utilization among pregnant women attending ANC in Etsako West Lga, Edo State, Nigeria. *Niger J Clin Pract* [Internet]. Jun 2010 13(2):144-148. In: Embase Available from  
· <http://ovidsp.ovid.com/ovidweb.cgi?T=JS&PAGE=reference&D=emed11&NEWS=N&AN=358948131>

- 1186 Sartorius B.K., Kahn K., Vounatsou P., Collinson M.A., Tollman S.M. Young and vulnerable: spatial-temporal trends and risk factors for infant mortality in rural South Africa (Agincourt), 1992-2007. BMC Public Health [Internet]. 2010 10 645. In: Embase Available from  
· <http://ovidsp.ovid.com/ovidweb.cgi?T=JS&PAGE=reference&D=emed11&NEWS=N&AN=360278014>
- 1187 Omole O.B., Ngobale K.N., Ayo-Yusuf O.A. Missed opportunities for tobacco use screening and brief cessation advice in South African primary health care: a cross-sectional study. BMC Fam Pract [Internet]. 2010 11 94. In: Embase Available from  
· <http://ovidsp.ovid.com/ovidweb.cgi?T=JS&PAGE=reference&D=emed11&NEWS=N&AN=360256781>
- 1188 Brugha R., Simbaya J., Walsh A., Dicker P., Ndubani P. How HIV/AIDS scale-up has impacted on non- HIV priority services in Zambia. BMC Public Health [Internet]. 2010 10 540. In: Embase Available from  
· <http://ovidsp.ovid.com/ovidweb.cgi?T=JS&PAGE=reference&D=emed11&NEWS=N&AN=360251068>
- 1189 Cunningham S.A., Elo I.T., Herbst K., Hosegood V. Prenatal development in rural South Africa: Relationship between birth weight and access to fathers and grandparents. Popul. Stud. [Internet]. 2010 64(3):229-246. In: Embase Available from  
· <http://ovidsp.ovid.com/ovidweb.cgi?T=JS&PAGE=reference&D=emed11&NEWS=N&AN=359826142>
- 1190 Ahoua L., Ayikoru H., Gnauck K., Odaru G., Odar E., Ondoa-Onama C., Pinoges L., Balkan S., Olson D., Pujades-Rodriguez M. Evaluation of a 5-year programme to prevent mother-to-child transmission of HIV infection in Northern Uganda. J. Trop. Pediatr. [Internet]. 13 Jul 2009 56(1):43-52. In: Embase Available from  
· <http://ovidsp.ovid.com/ovidweb.cgi?T=JS&PAGE=reference&D=emed11&NEWS=N&AN=358721802>
- 1191 Oladokun A., Oladokun R.E., Morhason-Bello I., Bello A.F., Adedokun B. Proximate predictors of early antenatal registration among Nigerian pregnant women. Ann. Afr. Med. [Internet]. December 2010 9(4):222-225. In: Embase Available from  
· <http://ovidsp.ovid.com/ovidweb.cgi?T=JS&PAGE=reference&D=emed11&NEWS=N&AN=359789912>
- 1192 Keri L., Kaye D., Sibylle K. Referral practices and perceived barriers to timely obstetric care among Ugandan traditional birth attendants (TBA). Afr Health Sci [Internet]. Mar 2010 10(1):75-81. In: Embase Available from  
· <http://ovidsp.ovid.com/ovidweb.cgi?T=JS&PAGE=reference&D=emed11&NEWS=N&AN=359531848>

- 1193 Hu D., Grossman D., Levin C., Blanchard K., Adanu R., Goldie S.J. Cost-effectiveness analysis of unsafe abortion and alternative first-trimester pregnancy termination strategies in Nigeria and Ghana. *Afr J Reprod Health* [Internet]. Jun 2010 14(2):85-103. In: Embase Available from <http://ovidsp.ovid.com/ovidweb.cgi?T=JS&PAGE=reference&D=emed11&NEWS=N&AN=361368160>
- 1194 Woldemicael G. Do women with higher autonomy seek more maternal health care? Evidence from Eritrea and Ethiopia. *Health Care Woman Int.* [Internet]. July 2010 31(7):599-620. In: Embase Available from <http://ovidsp.ovid.com/ovidweb.cgi?T=JS&PAGE=reference&D=emed11&NEWS=N&AN=358991848>
- 1195 Ayotunde T., Mary O., Melvin A.O., Faniyi F.F. Maternal age at birth and under-5 mortality in Nigeria. *East Afr J Public Health* [Internet]. Apr 2009 6(1):11-14. In: Embase Available from <http://ovidsp.ovid.com/ovidweb.cgi?T=JS&PAGE=reference&D=emed11&NEWS=N&AN=355881651>
- 1196 Mrisho M., Obrist B., Schellenberg J.A., Haws R.A., Mushi A.K., Mshinda H., Tanner M., Schellenberg D. The use of antenatal and postnatal care: Perspectives and experiences of women and health care providers in rural southern Tanzania. *BMC Pregnancy Childbirth* [Internet]. 04 Mar 2009 9 no pagination. In: Embase Available from <http://ovidsp.ovid.com/ovidweb.cgi?T=JS&PAGE=reference&D=emed11&NEWS=N&AN=354448677>
- 1197 Laher F., Todd C.S., Stibich M.A., Phofa R., Behane X., Mohapi L., Gray G. A qualitative assessment of decisions affecting contraceptive utilization and fertility intentions among HIV-positive women in Soweto, South Africa. *AIDS Behav.* [Internet]. June 2009 13(SUPPL. 1):S47-S54. In: Embase Available from <http://ovidsp.ovid.com/ovidweb.cgi?T=JS&PAGE=reference&D=emed11&NEWS=N&AN=50477192>
- 1198 Iyaniwura C.A., Yussuf Q. Utilization of antenatal care and delivery services in Sagamu, south western Nigeria. *Afr J Reprod Health* [Internet]. Sep 2009 13(3):111-122. In: Embase Available from <http://ovidsp.ovid.com/ovidweb.cgi?T=JS&PAGE=reference&D=emed11&NEWS=N&AN=359407974>
- 1199 Noreh L.J., Tucs O., Sekadde-Kigundu C.B., Noreh J.A. Outcomes of assisted reproductive technologies at the nairobi in vitro fertilisation centre. *East Afr. Med. J.* [Internet]. 2009 86(4):156-161. In: Embase Available from <http://ovidsp.ovid.com/ovidweb.cgi?T=JS&PAGE=reference&D=emed11&NEWS=N&AN=358339152>

1200 MacPhail C., Pettifor A., Moyo W., Rees H. Factors associated with HIV testing among sexually  
 active South African youth aged 15-24 years. *AIDS Care Psychol. Socio-Med. Asp. AIDS HIV*  
 [Internet]. April 2009 21(4):456-467. In: Embase Available from  
 . <http://ovidsp.ovid.com/ovidweb.cgi?T=JS&PAGE=reference&D=emed11&NEWS=N&AN=355647>  
 232

#### **PUBMED SEARCH RESULTS=366, LAST SEARCHED= 06/02/2019**

((("maternal health"[MeSH Terms] OR ("maternal"[All Fields] AND "health"[All Fields]) OR "maternal health"[All Fields]) AND ("statistics and numerical data"[Subheading] OR ("statistics"[All Fields] AND "numerical"[All Fields] AND "data"[All Fields]) OR "statistics and numerical data"[All Fields] OR "utilization"[All Fields]) AND antenatal[All Fields] AND prenatal[All Fields] AND factors[All Fields] AND ("africa"[MeSH Terms] OR "africa"[All Fields])) AND ("2008/01/01"[PDAT] : "2018/12/31"[PDAT]))

1: Ayebare E, Ntuyo P, Malande OO, Nalwadda G. Maternal, reproductive and obstetric factors associated with preterm births in Mulago Hospital, Kampala, Uganda: a case control study. *Pan Afr Med J.* 2018 Aug 10;30:272. doi: 10.11604/pamj.2018.30.272.13531. eCollection 2018. PubMed PMID: 30637057; PubMed Central PMCID: PMC6317463.

2: Tesfaw N, Gizachew A, Kassa GM, Abajobir AA. Skilled Delivery Service Utilization and Associated Factors among Mothers Who Gave Birth in the Last Two Years in Northwest Ethiopia. *Ethiop J Health Sci.* 2018 Jul;28(4):423-432. doi: 10.4314/ejhs.v28i4.8. PubMed PMID: 30607055; PubMed Central PMCID: PMC6308736.

3: Ahmed M, Demissie M, Medhanyie AA, Worku A, Berhane Y. Utilization of Institutional Delivery Service in a Predominantly Pastoralist Community of

Northeast Ethiopia. *Ethiop J Health Sci*. 2018 Jul;28(4):403-412. doi: 10.4314/ejhs.v28i4.6. Erratum in: *Ann Emerg Med*. 2017 Nov;70(5):758. *Ethiop J Health Sci*. 2018 Nov;28(6):809. PubMed PMID: 30607053; PubMed Central PMCID: PMC6308731.

4: Bishanga DR, Drake M, Kim YM, Mwanamsangu AH, Makuwani AM, Zoungrana J, Lemwayi R, Rijken MJ, Stekelenburg J. Factors associated with institutional delivery: Findings from a cross-sectional study in Mara and Kagera regions in Tanzania. *PLoS One*. 2018 Dec 26;13(12):e0209672. doi: 10.1371/journal.pone.0209672. eCollection 2018. PubMed PMID: 30586467; PubMed Central PMCID: PMC6306247.

5: Ozumba BC, Onyeneho NG, Chalupowski M, Subramanian SV. Inequities in Access to Maternal Health Care in Enugu State: Implications for Universal Health Coverage to Meet Vision 2030 in Nigeria. *Int Q Community Health Educ*. 2019 Apr;39(3):163-173. doi: 10.1177/0272684X18819977. Epub 2018 Dec 24. PubMed PMID: 30582725.

6: Mersha AG. Male involvement in the maternal health care system: implication towards decreasing the high burden of maternal mortality. *BMC Pregnancy Childbirth*. 2018 Dec 14;18(1):493. doi: 10.1186/s12884-018-2139-9. PubMed PMID: 30547771; PubMed Central PMCID: PMC6295014.

7: Alemu Y, Aragaw A. Early initiations of first antenatal care visit and associated factor among mothers who gave birth in the last six months preceding

birth in Bahir Dar Zuria Woreda North West Ethiopia. *Reprod Health*. 2018 Dec 12;15(1):203. doi: 10.1186/s12978-018-0646-9. PubMed PMID: 30541562; PubMed Central PMCID: PMC6292069.

8: Tesfaye G, Chojenta C, Smith R, Loxton D. Application of the Andersen-Newman model of health care utilization to understand antenatal care use in Kersa District, Eastern Ethiopia. *PLoS One*. 2018 Dec 6;13(12):e0208729. doi: 10.1371/journal.pone.0208729. eCollection 2018. PubMed PMID: 30521640; PubMed Central PMCID: PMC6283597.

9: Mochache V, Irungu E, El-Busaidy H, Temmerman M, Gichangi P. "Our voices matter": a before-after assessment of the effect of a community-participatory intervention to promote uptake of maternal and child health services in Kwale, Kenya. *BMC Health Serv Res*. 2018 Dec 4;18(1):938. doi: 10.1186/s12913-018-3739-9. PubMed PMID: 30514292; PubMed Central PMCID: PMC6280535.

10: Neke N, Reifferscheid A, Buchberger B, Wasem J. Time and cost associated with utilization of services at mobile health clinics among pregnant women. *BMC Health Serv Res*. 2018 Dec 3;18(1):920. doi: 10.1186/s12913-018-3736-z. PubMed PMID: 30509269; PubMed Central PMCID: PMC6276179.

11: Adu J, Tenkorang E, Banchani E, Allison J, Mulay S. The effects of individual and community-level factors on maternal health outcomes in Ghana. *PLoS One*. 2018 Nov 29;13(11):e0207942. doi: 10.1371/journal.pone.0207942. eCollection 2018. PubMed PMID: 30496236; PubMed Central PMCID: PMC6264832.

12: Leke AZ, Dolk H, Loane M, Casson K, Maboh NM, Maeya SE, Ndumbe LD, Nyenti PB, Armstrong O, Etiendem D. First trimester medication use in pregnancy in Cameroon: a multi-hospital survey. *BMC Pregnancy Childbirth*. 2018 Nov 20;18(1):450. doi: 10.1186/s12884-018-2081-x. PubMed PMID: 30458752; PubMed Central PMCID: PMC6245902.

13: Ayalew TW, Nigatu AM. Focused antenatal care utilization and associated factors in Debre Tabor Town, northwest Ethiopia, 2017. *BMC Res Notes*. 2018 Nov 16;11(1):819. doi: 10.1186/s13104-018-3928-y. PubMed PMID: 30445991; PubMed Central PMCID: PMC6240228.

14: Grum T, Brhane E, Hintsa S, Kahsay G. Magnitude and factors associated with anemia among pregnant women attending antenatal care in public health centers in central zone of Tigray region, northern Ethiopia: a cross sectional study. *BMC Pregnancy Childbirth*. 2018 Nov 1;18(1):433. doi: 10.1186/s12884-018-2063-z. PubMed PMID: 30382868; PubMed Central PMCID: PMC6211478.

15: Owiti A, Oyugi J, Essink D. Utilization of Kenya's free maternal health services among women living in Kibera slums: a cross-sectional study. *Pan Afr Med J*. 2018 May 30;30:86. doi: 10.11604/pamj.2018.30.86.15151. eCollection 2018. PubMed PMID: 30344870; PubMed Central PMCID: PMC6191270.

16: Benova L, Dennis ML, Lange IL, Campbell OMR, Waiswa P, Haemmerli M, Fernandez

Y, Kerber K, Lawn JE, Santos AC, Matovu F, Macleod D, Goodman C, Penn-Kekana L, Ssengooba F, Lynch CA. Two decades of antenatal and delivery care in Uganda: a cross-sectional study using Demographic and Health Surveys. *BMC Health Serv Res*. 2018 Oct 4;18(1):758. doi: 10.1186/s12913-018-3546-3. PubMed PMID: 30286749; PubMed Central PMCID: PMC6172797.

17: Grum T, Hintsa S, Hagos G. Dietary factors associated with preeclampsia or eclampsia among women in delivery care services in Addis Ababa, Ethiopia: a case control study. *BMC Res Notes*. 2018 Oct 1;11(1):683. doi: 10.1186/s13104-018-3793-8. PubMed PMID: 30285827; PubMed Central PMCID: PMC6167851.

18: Rianga'a RM, Nangulu AK, Broerse JEW. "I should have started earlier, but I was not feeling ill!" Perceptions of Kalenjin women on antenatal care and its implications on initial access and differentials in patterns of antenatal care utilization in rural Uasin Gishu County Kenya. *PLoS One*. 2018 Oct 3;13(10):e0202895. doi: 10.1371/journal.pone.0202895. eCollection 2018. PubMed PMID: 30281594; PubMed Central PMCID: PMC6169856.

19: Tafere TE, Afework MF, Yalew AW. Providers adherence to essential contents of antenatal care services increases birth weight in Bahir Dar City Administration, north West Ethiopia: a prospective follow up study. *Reprod Health*. 2018 Sep 29;15(1):163. doi: 10.1186/s12978-018-0610-8. PubMed PMID: 30268132; PubMed Central PMCID: PMC6162936.



20: Siyoum M, Astatkie A, Mekonnen S, Bekele G, Taye K, Tenaw Z, Yohannes Z, Kassaye Z. Home birth and its determinants among antenatal care-booked women in public hospitals in Wolayta Zone, southern Ethiopia. *PLoS One*. 2018 Sep 7;13(9):e0203609. doi: 10.1371/journal.pone.0203609. eCollection 2018. PubMed PMID: 30192861; PubMed Central PMCID: PMC6128615.

21: Peltzer K, Babayigit S, Rodriguez VJ, Jean J, Sifunda S, Jones DL. Effect of a multicomponent behavioural PMTCT cluster randomised controlled trial on HIV stigma reduction among perinatal HIV positive women in Mpumalanga province, South Africa. *SAHARA J*. 2018 Dec;15(1):80-88. doi: 10.1080/17290376.2018.1510787. PubMed PMID: 30134772; PubMed Central PMCID: PMC6116698.

22: Mekonnen FA, Ambaw YA, Neri GT. Socio-economic determinants of anemia in pregnancy in North Shoa Zone, Ethiopia. *PLoS One*. 2018 Aug 22;13(8):e0202734. doi: 10.1371/journal.pone.0202734. eCollection 2018. PubMed PMID: 30133527; PubMed Central PMCID: PMC6105028.

23: Kebede A, Gerensea H, Amare F, Tesfay Y, Teklay G. The magnitude of anemia and associated factors among pregnant women attending public institutions of Shire Town, Shire, Tigray, Northern Ethiopia, 2018. *BMC Res Notes*. 2018 Aug 17;11(1):595. doi: 10.1186/s13104-018-3706-x. PubMed PMID: 30119701; PubMed Central PMCID: PMC6098597.

24: Fekadu E, Yigzaw G, Gelaye KA, Ayele TA, Minwuye T, Geneta T, Teshome DF. Prevalence of domestic violence and associated factors among pregnant women

attending antenatal care service at University of Gondar Referral Hospital, Northwest Ethiopia. BMC Womens Health. 2018 Aug 14;18(1):138. doi: 10.1186/s12905-018-0632-y. PubMed PMID: 30107793; PubMed Central PMCID: PMC6092801.

25: Kamala BA, Mgaya AH, Ngarina MM, Kidanto HL. Predictors of low birth weight and 24-hour perinatal outcomes at Muhimbili National Hospital in Dar es Salaam, Tanzania: a five-year retrospective analysis of obstetric records. Pan Afr Med J. 2018 Apr 23;29:220. doi: 10.11604/pamj.2018.29.220.15247. eCollection 2018. PubMed PMID: 30100974; PubMed Central PMCID: PMC6080975.

26: Wassihun B, Deribe L, Worede N, Gultie T. Prevalence of disrespect and abuse of women during child birth and associated factors in Bahir Dar town, Ethiopia. Epidemiol Health. 2018 Jul 1;40:e2018029. doi: 10.4178/epih.e2018029. eCollection 2018. PubMed PMID: 30056644; PubMed Central PMCID: PMC6178351.

27: Nigatu G, Assefa Woreta S, Akalu TY, Yenit MK. Prevalence and associated factors of underweight among children 6-59 months of age in Takusa district, Northwest Ethiopia. Int J Equity Health. 2018 Jul 24;17(1):106. doi: 10.1186/s12939-018-0816-y. PubMed PMID: 30041638; PubMed Central PMCID: PMC6057034.

28: Okonofua FE, Ogu RN, Ntoimo LF, Gana M, Okike ON, Durodola A, Galadanci HS. Where do delays occur when women receive antenatal care? A client flow multi-site study in four health facilities in Nigeria. Ghana Med J. 2018 Mar;52(1):8-14.

doi: 10.4314/gmj.v52i1.3. PubMed PMID: 30013255; PubMed Central PMCID: PMC6026948.

29: Iwuh IA, Fawcus S, Schoeman L. Maternal near-miss audit in the Metro West maternity service, Cape Town, South Africa: A retrospective observational study. *S Afr Med J*. 2018 Feb 27;108(3):171-175. doi: 10.7196/SAMJ.2018.v108i3.12876. PubMed PMID: 30004358.

30: Abota TL, Atenafu NT. Postnatal Care Utilization and Associated Factors among Married Women in Benchi-Maji Zone, Southwest Ethiopia: A Community Based Cross-Sectional Study. *Ethiop J Health Sci*. 2018 May;28(3):267-276. doi: 10.4314/ejhs.v28i3.4. PubMed PMID: 29983526; PubMed Central PMCID: PMC6016362.

31: Gizaw B, Gebremedhin S. Factors associated with low birthweight in North Shewa zone, Central Ethiopia: case-control study. *Ital J Pediatr*. 2018 Jul 4;44(1):76. doi: 10.1186/s13052-018-0516-7. PubMed PMID: 29973240; PubMed Central PMCID: PMC6030760.

32: Cockcroft A, Omer K, Gidado Y, Gamawa AI, Andersson N. Impact of universal home visits on maternal and infant outcomes in Bauchi state, Nigeria: protocol of a cluster randomized controlled trial. *BMC Health Serv Res*. 2018 Jul 3;18(1):510. doi: 10.1186/s12913-018-3319-z. PubMed PMID: 29970071; PubMed Central PMCID: PMC6029180.

33: Lechthaler F, Abakar MF, Schelling E, Hattendorf J, Ouedraogo B, Moto DD, Zinsstag J. Bottlenecks in the provision of antenatal care: rural settled and mobile pastoralist communities in Chad. *Trop Med Int Health*. 2018 Sep;23(9):1033-1044. doi: 10.1111/tmi.13120. Epub 2018 Jul 23. PubMed PMID: 29923662.

34: Mihret MS, Limenih MA, Gudayu TW. The role of timely initiation of antenatal care on protective dose tetanus toxoid immunization: the case of northern Ethiopia post natal mothers. *BMC Pregnancy Childbirth*. 2018 Jun 15;18(1):235. doi: 10.1186/s12884-018-1878-y. PubMed PMID: 29907139; PubMed Central PMCID: PMC6003212.

35: Koné S, Hürlimann E, Baikoro N, Dao D, Bonfoh B, N'Goran EK, Utzinger J, Jaeger FN. Pregnancy-related morbidity and risk factors for fatal foetal outcomes in the Taabo health and demographic surveillance system, Côte d'Ivoire. *BMC Pregnancy Childbirth*. 2018 Jun 7;18(1):216. doi: 10.1186/s12884-018-1858-2. PubMed PMID: 29879939; PubMed Central PMCID: PMC5992668.

36: Birhanu TM, Birarra MK, Mekonnen FA. Compliance to iron and folic acid supplementation in pregnancy, Northwest Ethiopia. *BMC Res Notes*. 2018 May 30;11(1):345. doi: 10.1186/s13104-018-3433-3. PubMed PMID: 29848380; PubMed Central PMCID: PMC5977755.

37: Smeele P, Kalisa R, van Elteren M, van Roosmalen J, van den Akker T. Birth preparedness and complication readiness among pregnant women admitted in a rural

hospital in Rwanda. *BMC Pregnancy Childbirth*. 2018 May 30;18(1):190. doi: 10.1186/s12884-018-1818-x. PubMed PMID: 29848311; PubMed Central PMCID: PMC5977552.

38: Lindtjørn B, Mitike D, Zidda Z, Yaya Y. Reducing stillbirths in Ethiopia: Results of an intervention programme. *PLoS One*. 2018 May 30;13(5):e0197708. doi: 10.1371/journal.pone.0197708. eCollection 2018. PubMed PMID: 29847607; PubMed Central PMCID: PMC5976193.

39: Saaka M, Ali F, Vuu F. Prevalence and determinants of essential newborn care practices in the Lawra District of Ghana. *BMC Pediatr*. 2018 May 24;18(1):173. doi: 10.1186/s12887-018-1145-4. PubMed PMID: 29793543; PubMed Central PMCID: PMC5968597.

40: Adewuyi EO, Auta A, Khanal V, Bamidele OD, Akuoko CP, Adefemi K, Tapshak SJ, Zhao Y. Prevalence and factors associated with underutilization of antenatal care services in Nigeria: A comparative study of rural and urban residences based on the 2013 Nigeria demographic and health survey. *PLoS One*. 2018 May 21;13(5):e0197324. doi: 10.1371/journal.pone.0197324. eCollection 2018. PubMed PMID: 29782511; PubMed Central PMCID: PMC5962076.

41: Ndirangu MN, Gatimu SM, Mwinyi HM, Kibiwott DC. Trends and factors associated with early initiation of breastfeeding in Namibia: analysis of the Demographic and Health Surveys 2000-2013. *BMC Pregnancy Childbirth*. 2018 May 16;18(1):171. doi: 10.1186/s12884-018-1811-4. PubMed PMID: 29769063; PubMed Central PMCID:

PMC5956738.

42: Mutaganzwa C, Wibecan L, Iyer HS, Nahimana E, Manzi A, Biziyaremye F, Nyishime M, Nkikabahizi F, Hirschhorn LR, Magge H. Advancing the health of women and newborns: predictors of patient satisfaction among women attending antenatal and maternity care in rural Rwanda. *Int J Qual Health Care*. 2018 Dec 1;30(10):793-801. doi: 10.1093/intqhc/mzy103. PubMed PMID: 29767725; PubMed Central PMCID: PMC6340346.

43: Mwase T, Brenner S, Mazalale J, Lohmann J, Hamadou S, Somda SMA, Ridde V, De Allegri M. Inequities and their determinants in coverage of maternal health services in Burkina Faso. *Int J Equity Health*. 2018 May 11;17(1):58. doi: 10.1186/s12939-018-0770-8. PubMed PMID: 29751836; PubMed Central PMCID: PMC5948792.

44: Forbes F, Wynter K, Wade C, Zeleke BM, Fisher J. Male partner attendance at antenatal care and adherence to antenatal care guidelines: secondary analysis of 2011 Ethiopian demographic and health survey data. *BMC Pregnancy Childbirth*. 2018 May 9;18(1):145. doi: 10.1186/s12884-018-1775-4. PubMed PMID: 29743039; PubMed Central PMCID: PMC5944090.

45: Okonofua F, Ntoimo L, Ogungbangbe J, Anjorin S, Imongan W, Yaya S. Predictors of women's utilization of primary health care for skilled pregnancy care in rural Nigeria. *BMC Pregnancy Childbirth*. 2018 Apr 18;18(1):106. doi: 10.1186/s12884-018-1730-4. PubMed PMID: 29669538; PubMed Central PMCID:

PMC5907371.

46: Niguse S, Hailekiros H, Buruh G, Dejene T, Berhe N, Asmelash T. Seroprevalence and risk factors of Hepatitis E virus infection among pregnant women attending antenatal care in health facilities of Tigray, Northern Ethiopia. *J Med Virol*. 2018 Aug;90(8):1364-1369. doi: 10.1002/jmv.25190. Epub 2018 Apr 26. PubMed PMID: 29663452.

47: Moyo N, Makasa M, Chola M, Musonda P. Access factors linked to maternal deaths in Lundazi district, Eastern Province of Zambia: a case control study analysing maternal death reviews. *BMC Pregnancy Childbirth*. 2018 Apr 16;18(1):101. doi: 10.1186/s12884-018-1717-1. PubMed PMID: 29661240; PubMed Central PMCID: PMC5902869.

48: Nyongesa C, Xu X, Hall JJ, Macharia WM, Yego F, Hall B. Factors influencing choice of skilled birth attendance at ANC: evidence from the Kenya demographic health survey. *BMC Pregnancy Childbirth*. 2018 Apr 10;18(1):88. doi: 10.1186/s12884-018-1727-z. PubMed PMID: 29631549; PubMed Central PMCID: PMC5891962.

49: Owaka IO, Nyanchoka MK, Atieli HE. Intimate partner violence in pregnancy among antenatal attendees at health facilities in West Pokot county, Kenya. *Pan Afr Med J*. 2017 Nov 15;28:229. doi: 10.11604/pamj.2017.28.229.8840. eCollection 2017. PubMed PMID: 29629015; PubMed Central PMCID: PMC5882208.

50: Abubakar S, Adamu D, Hamza R, Galadima JB. Determinants of Home Delivery among Women attending Antenatal Care in Bagwai Town, Kano Nigeria. *Afr J Reprod Health*. 2017 Dec;21(4):73-79. doi: 10.29063/ajrh2017/v21i4.8. PubMed PMID: 29624953.

51: Laing SP, Sinmyee SV, Rafique K, Smith HE, Cooper MJ. Barriers to Antenatal Care in an Urban Community in the Gambia: An In-depth Qualitative Interview Study. *Afr J Reprod Health*. 2017 Sep;21(3):62-69. PubMed PMID: 29624929.

52: Weldemariam S, Kiros A, Welday M. Utilization of institutional delivery service and associated factors among mothers in North West Ethiopian. *BMC Res Notes*. 2018 Mar 27;11(1):194. doi: 10.1186/s13104-018-3295-8. PubMed PMID: 29580256; PubMed Central PMCID: PMC5870376.

53: Agho KE, Ezech OK, Ogbo FA, Enoma AI, Raynes-Greenow C. Factors associated with inadequate receipt of components and use of antenatal care services in Nigeria: a population-based study. *Int Health*. 2018 May 1;10(3):172-181. doi: 10.1093/inthealth/ihy011. PubMed PMID: 29562242.

54: Ogbo FA, Page A, Idoko J, Agho KE. Population attributable risk of key modifiable risk factors associated with non-exclusive breastfeeding in Nigeria. *BMC Public Health*. 2018 Feb 13;18(1):247. doi: 10.1186/s12889-018-5145-y. PubMed PMID: 29439701; PubMed Central PMCID: PMC5812198.



55: Kibusi SM, Sunguya BF, Kimunai E, Hines CS. Health insurance is important in improving maternal health service utilization in Tanzania-analysis of the 2011/2012 Tanzania HIV/AIDS and malaria indicator survey. *BMC Health Serv Res*. 2018 Feb 13;18(1):112. doi: 10.1186/s12913-018-2924-1. PubMed PMID: 29439693; PubMed Central PMCID: PMC5812106.

56: Gelano TF, Assefa N, Bacha YD, Mahamed AA, Roba KT, Hambisa MT. Effect of Mobile-health on maternal health care service utilization in Eastern Ethiopia: study protocol for a randomized controlled trial. *Trials*. 2018 Feb 12;19(1):102. doi: 10.1186/s13063-018-2446-5. PubMed PMID: 29433537; PubMed Central PMCID: PMC5809837.

57: Carvajal-Aguirre L, Amouzou A, Mehra V, Ziqi M, Zaka N, Newby H. Gap between contact and content in maternal and newborn care: An analysis of data from 20 countries in sub-Saharan Africa. *J Glob Health*. 2017 Dec;7(2):020501. doi: 10.7189/jogh.07.020501. PubMed PMID: 29423178; PubMed Central PMCID: PMC5804037.

58: Liyew EF, Yalew AW, Afework MF, Essén B. Distant and proximate factors associated with maternal near-miss: a nested case-control study in selected public hospitals of Addis Ababa, Ethiopia. *BMC Womens Health*. 2018 Jan 27;18(1):28. doi: 10.1186/s12905-018-0519-y. PubMed PMID: 29374484; PubMed Central PMCID: PMC5787253.

59: Haemmerli M, Santos A, Penn-Kekana L, Lange I, Matovu F, Benova L, Wong KLM,

Goodman C. How equitable is social franchising? Case studies of three maternal healthcare franchises in Uganda and India. *Health Policy Plan*. 2018 Apr 1;33(3):411-419. doi: 10.1093/heapol/czx192. PubMed PMID: 29373681; PubMed Central PMCID: PMC5886275.

60: Okoth VA, Maina JW, Ransom J. Antenatal care attendance and uptake of skilled delivery, Lokitaung Sub-County Hospital, Turkana County, Kenya. *Trop Doct*. 2018 Apr;48(2):97-99. doi: 10.1177/0049475518754719. Epub 2018 Jan 23. PubMed PMID: 29359996.

61: Mochache V, Lakhani A, El-Busaidy H, Temmerman M, Gichangi P. Pattern and determinants of contraceptive usage among women of reproductive age from the Digo community residing in Kwale, Kenya: results from a cross-sectional household survey. *BMC Womens Health*. 2018 Jan 8;18(1):10. doi: 10.1186/s12905-017-0497-5. PubMed PMID: 29310654; PubMed Central PMCID: PMC5759252.

62: Amolo L, Irimu G, Njai D. Knowledge of postnatal mothers on essential newborn care practices at the Kenyatta National Hospital: a cross sectional study. *Pan Afr Med J*. 2017 Sep 29;28:97. doi: 10.11604/pamj.2017.28.97.13785. eCollection 2017. PubMed PMID: 29255567; PubMed Central PMCID: PMC5724942.

63: Bikinesi LT, Mash R, Joyner K. Prevalence of intimate partner violence and associated factors amongst women attending antenatal care at Outapi clinic, Namibia: A descriptive survey. *Afr J Prim Health Care Fam Med*. 2017 Dec 6;9(1):e1-e6. doi: 10.4102/phcfm.v9i1.1512. PubMed PMID: 29227133; PubMed Central

PMCID: PMC5803512.

64: Delprato M, Akyeamong K. The Effect of Early Marriage Timing on Women's and Children's Health in Sub-Saharan Africa and Southwest Asia. *Ann Glob Health*. 2017 May - Aug;83(3-4):557-567. doi: 10.1016/j.aogh.2017.10.005. Epub 2017 Nov 8. PubMed PMID: 29221529.

65: Sanoussi Y. Measurement and analysis of inequality of opportunity in access of maternal and child health care in Togo. *BMC Health Serv Res*. 2017 Dec 4;17(Suppl 2):699. doi: 10.1186/s12913-017-2647-8. PubMed PMID: 29219086; PubMed Central PMCID: PMC5773902.

66: Idowu A, Olowookere SA, Abiola OO, Akinwumi AF, Adegbenro C. Determinants of Skilled Care Utilization among Pregnant Women Residents in an Urban Community in Kwara State, Northcentral Nigeria. *Ethiop J Health Sci*. 2017 May;27(3):291-298. PubMed PMID: 29217928; PubMed Central PMCID: PMC5615000.

67: Andarge E, Nigussie A, Wondafrash M. Factors associated with birth preparedness and complication readiness in Southern Ethiopia: a community based cross-sectional study. *BMC Pregnancy Childbirth*. 2017 Dec 8;17(1):412. doi: 10.1186/s12884-017-1582-3. PubMed PMID: 29216830; PubMed Central PMCID: PMC5721538.

68: Seme A, Seifu A. INSTITUTIONAL DELIVERY SERVICES UTILIZATION BY WOMEN OF

CHILDBEARING AGE IN SOUTH WEST SHOWA ZONE, OROMIA REGION. *Ethiop Med J*. 2017 Jan;55(1):49-61. PubMed PMID: 29148639.

69: Tesfaye G, Loxton D, Chojenta C, Semahegn A, Smith R. Delayed initiation of antenatal care and associated factors in Ethiopia: a systematic review and meta-analysis. *Reprod Health*. 2017 Nov 15;14(1):150. doi: 10.1186/s12978-017-0412-4. Review. PubMed PMID: 29141675; PubMed Central PMCID: PMC5688656.

70: Lakew D, Tesfaye D, Mekonnen H. Determinants of stillbirth among women deliveries at Amhara region, Ethiopia. *BMC Pregnancy Childbirth*. 2017 Nov 13;17(1):375. doi: 10.1186/s12884-017-1573-4. PubMed PMID: 29132338; PubMed Central PMCID: PMC5683523.

71: Kiwanuka TS, Ononge S, Kiondo P, Namusoke F. Adherence to iron supplements among women receiving antenatal care at Mulago National Referral Hospital, Uganda-cross-sectional study. *BMC Res Notes*. 2017 Oct 25;10(1):510. doi: 10.1186/s13104-017-2834-z. PubMed PMID: 29070052; PubMed Central PMCID: PMC5657073.

72: Haruna-Ogun OA. Geographical differentials in uptake of antenatal care services in Nigeria. *Health Care Women Int*. 2018 Jan;39(1):34-49. doi: 10.1080/07399332.2017.1388804. Epub 2017 Nov 28. PubMed PMID: 29053408.

73: Doku DT, Neupane S. Survival analysis of the association between antenatal care attendance and neonatal mortality in 57 low- and middle-income countries. *Int J Epidemiol*. 2017 Oct 1;46(5):1668-1677. doi: 10.1093/ije/dyx125. PubMed PMID: 29040531; PubMed Central PMCID: PMC5837573.

74: Sumankuuro J, Crockett J, Wang S. The use of antenatal care in two rural districts of Upper West Region, Ghana. *PLoS One*. 2017 Sep 28;12(9):e0185537. doi: 10.1371/journal.pone.0185537. eCollection 2017. PubMed PMID: 28957422; PubMed Central PMCID: PMC5619770.

75: Rebnord T, Østbye T, Mmbaga BT, Mchome B, Lie RT, Daltveit AK. Time trends in management of HIV-positive pregnant women in Northern Tanzania: A registry-based study. *PLoS One*. 2017 Sep 28;12(9):e0184362. doi: 10.1371/journal.pone.0184362. eCollection 2017. Erratum in: *PLoS One*. 2018 Dec 18;13(12):e0209545. PubMed PMID: 28957345; PubMed Central PMCID: PMC5619723.

76: Manda-Taylor L, Mwale D, Phiri T, Walsh A, Matthews A, Brugha R, Mwapasa V, Byrne E. Changing times? Gender roles and relationships in maternal, newborn and child health in Malawi. *BMC Pregnancy Childbirth*. 2017 Sep 25;17(1):321. doi: 10.1186/s12884-017-1523-1. PubMed PMID: 28946847; PubMed Central PMCID: PMC5613316.

77: Yaya S, Bishwajit G, Ekholuenetale M, Shah V, Kadio B, Udenigwe O. Timing and adequate attendance of antenatal care visits among women in Ethiopia. *PLoS One*. 2017 Sep 18;12(9):e0184934. doi: 10.1371/journal.pone.0184934. eCollection 2017.

PubMed PMID: 28922383; PubMed Central PMCID: PMC5602662.

78: Kaufman MR, Harman JJ, Smelyanskaya M, Orkis J, Ainslie R. "Love me, parents!": impact evaluation of a national social and behavioral change communication campaign on maternal health outcomes in Tanzania. *BMC Pregnancy Childbirth*. 2017 Sep 15;17(1):305. doi: 10.1186/s12884-017-1470-x. PubMed PMID: 28915850; PubMed Central PMCID: PMC5603041.

79: Ejeta E, Dabsu R, Zewdie O, Merdassa E. Factors determining late antenatal care booking and the content of care among pregnant mother attending antenatal care services in East Wollega administrative zone, West Ethiopia. *Pan Afr Med J*. 2017 Jul 7;27:184. doi: 10.11604/pamj.2017.27.184.10926. eCollection 2017. PubMed PMID: 28904711; PubMed Central PMCID: PMC5579454.

80: Muchie KF. Quality of antenatal care services and completion of four or more antenatal care visits in Ethiopia: a finding based on a demographic and health survey. *BMC Pregnancy Childbirth*. 2017 Sep 11;17(1):300. doi: 10.1186/s12884-017-1488-0. PubMed PMID: 28893222; PubMed Central PMCID: PMC5594613.

81: Mengist HM, Zewdie O, Belew A. Intestinal helminthic infection and anemia among pregnant women attending ante-natal care (ANC) in East Wollega, Oromia, Ethiopia. *BMC Res Notes*. 2017 Sep 5;10(1):440. doi: 10.1186/s13104-017-2770-y. PubMed PMID: 28870241; PubMed Central PMCID: PMC5584021.

82: Anlaakuu P, Anto F. Anaemia in pregnancy and associated factors: a cross sectional study of antenatal attendants at the Sunyani Municipal Hospital, Ghana. BMC Res Notes. 2017 Aug 11;10(1):402. doi: 10.1186/s13104-017-2742-2. PubMed PMID: 28800737; PubMed Central PMCID: PMC5553653.

83: Mengist HM, Zewdie O, Belew A, Dabsu R. Prevalence and drug susceptibility pattern of group B Streptococci (GBS) among pregnant women attending antenatal care (ANC) in Nekemte Referral Hospital (NRH), Nekemte, Ethiopia. BMC Res Notes. 2017 Aug 10;10(1):388. doi: 10.1186/s13104-017-2725-3. PubMed PMID: 28797286; PubMed Central PMCID: PMC5553668.

84: Budree S, Stein DJ, Brittain K, Goddard E, Koen N, Barnett W, Myer L, Zar HJ. Maternal and infant factors had a significant impact on birthweight and longitudinal growth in a South African birth cohort. Acta Paediatr. 2017 Nov;106(11):1793-1801. doi: 10.1111/apa.14015. Epub 2017 Sep 4. PubMed PMID: 28796908; PubMed Central PMCID: PMC5656834.

85: Derso T, Abera Z, Tariku A. Magnitude and associated factors of anemia among pregnant women in Dera District: a cross-sectional study in northwest Ethiopia. BMC Res Notes. 2017 Aug 1;10(1):359. doi: 10.1186/s13104-017-2690-x. PubMed PMID: 28764745; PubMed Central PMCID: PMC5540297.

86: Dansou J, Adekunle AO, Arowojolu AO. Factors associated with antenatal care services utilisation patterns amongst reproductive age women in Benin Republic:

An analysis of 2011/2012 benin republic's demographic and health survey data.

Niger Postgrad Med J. 2017 Apr-Jun;24(2):67-74. doi: 10.4103/npmj.npmj\_16\_17.

PubMed PMID: 28762359.

87: Getiye Y, Fantahun M. Factors associated with perinatal mortality among public health deliveries in Addis Ababa, Ethiopia, an unmatched case control study. BMC Pregnancy Childbirth. 2017 Jul 26;17(1):245. doi:

10.1186/s12884-017-1420-7. PubMed PMID: 28747161; PubMed Central PMCID: PMC5530490.

88: Hofer CB, Egger M, Davies MA, Frota ACC, de Oliveira RH, Abreu TF, Araújo LE, Witthlin BB, Carvalho AW, Cordeiro JR, Lima GP, Keiser O. The cascade of care to prevent mother-to-child transmission in Rio de Janeiro, Brazil, 1996-2013:

improving but still some way to go. Trop Med Int Health. 2017

Oct;22(10):1266-1274. doi: 10.1111/tmi.12925. Epub 2017 Aug 10. PubMed PMID: 28707345.

89: Nyathi L, Tugli AK, Tshitangano TG, Mpofu M. Investigating the accessibility factors that influence antenatal care services utilisation in Mangwe district,

Zimbabwe. Afr J Prim Health Care Fam Med. 2017 Jun 29;9(1):e1-e5. doi:

10.4102/phcfm.v9i1.1337. PubMed PMID: 28697619; PubMed Central PMCID: PMC5506496.

90: Manyeh AK, Akpakli DE, Kukula V, Ekey RA, Narh-Bana S, Adjei A, Gyapong M.

Socio-demographic determinants of skilled birth attendant at delivery in rural southern Ghana. BMC Res Notes. 2017 Jul 11;10(1):268. doi:



10.1186/s13104-017-2591-z. PubMed PMID: 28693617; PubMed Central PMCID: PMC5504761.

91: Virgo S, Gon G, Cavallaro FL, Graham W, Woodd S. Who delivers where? The effect of obstetric risk on facility delivery in East Africa. *Trop Med Int Health*. 2017 Sep;22(9):1081-1098. doi: 10.1111/tmi.12910. Epub 2017 Jul 10. PubMed PMID: 28627069.

92: Mengesha HG, Wuneh AD, Weldearegawi B, Selvakumar DL. Low birth weight and macrosomia in Tigray, Northern Ethiopia: who are the mothers at risk? *BMC Pediatr*. 2017 Jun 12;17(1):144. doi: 10.1186/s12887-017-0901-1. PubMed PMID: 28606178; PubMed Central PMCID: PMC5469141.

93: Adejoh SO, Olorunlana A, Olaosebikan O. Maternal Health: a Qualitative Study of Male Partners' Participation in Lagos, Nigeria. *Int J Behav Med*. 2018 Feb;25(1):112-122. doi: 10.1007/s12529-017-9659-y. PubMed PMID: 28585072.

94: Gulema H, Berhane Y. Timing of First Antenatal Care Visit and its Associated Factors among Pregnant Women Attending Public Health Facilities in Addis Ababa, Ethiopia. *Ethiop J Health Sci*. 2017 Mar;27(2):139-146. PubMed PMID: 28579709; PubMed Central PMCID: PMC5440828.

95: Sakeah E, Okawa S, Rexford Oduro A, Shibanuma A, Ansah E, Kikuchi K, Gyapong M, Owusu-Agyei S, Williams J, Debpuur C, Yeji F, Kukula VA, Enuameh Y, Asare GQ,

Agyekum EO, Addai S, Sarpong D, Adjei K, Tawiah C, Yasuoka J, Nanishi K, Jimba M, Hodgson A, The Ghana Embrace Team. Determinants of attending antenatal care at least four times in rural Ghana: analysis of a cross-sectional survey. *Glob Health Action*. 2017;10(1):1291879. doi: 10.1080/16549716.2017.1291879. PubMed PMID: 28578634; PubMed Central PMCID: PMC5496066.

96: Turton MS, Henkel RR, Africa CWJ. A simple point of care test can indicate the need for periodontal therapy to reduce the risk for adverse pregnancy outcomes in mothers attending antenatal clinics. *Biomarkers*. 2017 Dec;22(8):740-746. doi: 10.1080/1354750X.2017.1334151. Epub 2017 Jun 6. PubMed PMID: 28562097.

97: Chukwuma A, Wosu AC, Mbachu C, Weze K. Quality of antenatal care predicts retention in skilled birth attendance: a multilevel analysis of 28 African countries. *BMC Pregnancy Childbirth*. 2017 May 25;17(1):152. doi: 10.1186/s12884-017-1337-1. PubMed PMID: 28545422; PubMed Central PMCID: PMC5445515.

98: Aliyu AA, Dahiru T. Predictors of delayed Antenatal Care (ANC) visits in Nigeria: secondary analysis of 2013 Nigeria Demographic and Health Survey (NDHS). *Pan Afr Med J*. 2017 Mar 3;26:124. doi: 10.11604/pamj.2017.26.124.9861. eCollection 2017. PubMed PMID: 28533847; PubMed Central PMCID: PMC5429423.

99: Wilunda C, Scanagatta C, Putoto G, Montalbetti F, Segafredo G, Takahashi R, Mizerero SA, Betrán AP. Barriers to utilisation of antenatal care services in

South Sudan: a qualitative study in Rumbek North County. *Reprod Health*. 2017 May 22;14(1):65. doi: 10.1186/s12978-017-0327-0. PubMed PMID: 28532513; PubMed Central PMCID: PMC5440928.

100: Abimbola JM, Makanjuola AT, Ganiyu SA, Babatunde UMM, Adekunle DK, Olatayo AA. Pattern of utilization of ante-natal and delivery services in a semi-urban community of North-Central Nigeria. *Afr Health Sci*. 2016 Dec;16(4):962-971. doi: 10.4314/ahs.v16i4.12. PubMed PMID: 28479888; PubMed Central PMCID: PMC5398442.

101: Banke-Thomas A, Banke-Thomas O, Kivuvani M, Ameh CA. Maternal health services utilisation by Kenyan adolescent mothers: Analysis of the Demographic Health Survey 2014. *Sex Reprod Healthc*. 2017 Jun;12:37-46. doi: 10.1016/j.srhc.2017.02.004. Epub 2017 Feb 17. PubMed PMID: 28477930.

102: Sialubanje C, Massar K, Hamer DH, Ruiter RAC. Personal and environmental factors associated with the utilisation of maternity waiting homes in rural Zambia. *BMC Pregnancy Childbirth*. 2017 May 4;17(1):136. doi: 10.1186/s12884-017-1317-5. PubMed PMID: 28472945; PubMed Central PMCID: PMC5418767.

103: Kuuire VZ, Kangmennaang J, Atuoye KN, Antabe R, Boamah SA, Vercillo S, Amoyaw JA, Luginaah I. Timing and utilisation of antenatal care service in Nigeria and Malawi. *Glob Public Health*. 2017 Jun;12(6):711-727. doi: 10.1080/17441692.2017.1316413. PubMed PMID: 28441926.

104: Chorong D, Okinda FM, Kariuki EJ, Mulewa E, Ibinda F, Muhula S, Kimathi G, Muga R. Factors influencing the utilization of focused antenatal care services in Malindi and Magarini sub-counties of Kilifi county, Kenya. *Pan Afr Med J*. 2016 Nov 26;25(Suppl 2):14. doi: 10.11604/pamj.supp.2016.25.2.10520. eCollection 2016. PubMed PMID: 28439338; PubMed Central PMCID: PMC5390059.

105: Kananura RM, Wamala R, Ekirapa-Kiracho E, Tetui M, Kiwanuka SN, Waiswa P, Atuhaire LK. A structural equation analysis on the relationship between maternal health services utilization and newborn health outcomes: a cross-sectional study in Eastern Uganda. *BMC Pregnancy Childbirth*. 2017 Mar 27;17(1):98. doi: 10.1186/s12884-017-1289-5. PubMed PMID: 28347281; PubMed Central PMCID: PMC5369185.

106: Saaka M, Aryee P, Kuganab-Lem R, Ali M, Masahudu AR. The effect of social behavior change communication package on maternal knowledge in obstetric danger signs among mothers in East Mamprusi District of Ghana. *Global Health*. 2017 Mar 21;13(1):19. doi: 10.1186/s12992-017-0243-7. PubMed PMID: 28327154; PubMed Central PMCID: PMC5361799.

107: Lavin T, Pattinson RC. Does antenatal care timing influence stillbirth risk in the third trimester? A secondary analysis of perinatal death audit data in South Africa. *BJOG*. 2018 Jan;125(2):140-147. doi: 10.1111/1471-0528.14645. Epub 2017 Jun 26. PubMed PMID: 28317228.

108: Sadiq AA, Poggensee G, Nguku P, Sabitu K, Abubakar A, Puone T. Factors associated with adverse pregnancy outcomes and perceptions of risk factors among reproductive age women in Soba LGA, Kaduna State 2013. *Pan Afr Med J.* 2016 Oct 25;25:111. doi: 10.11604/pamj.2016.25.111.8739. eCollection 2016. PubMed PMID: 28292074; PubMed Central PMCID: PMC5325518.

109: Kalisa R, Malande OO. Birth preparedness, complication readiness and male partner involvement for obstetric emergencies in rural Rwanda. *Pan Afr Med J.* 2016 Oct 17;25:91. doi: 10.11604/pamj.2016.25.91.9710. eCollection 2016. PubMed PMID: 28292054; PubMed Central PMCID: PMC5325493.

110: Gudu W. Prodromal symptoms, health care seeking in response to symptoms and associated factors in eclamptic patients. *BMC Pregnancy Childbirth.* 2017 Mar 14;17(1):87. doi: 10.1186/s12884-017-1272-1. PubMed PMID: 28288576; PubMed Central PMCID: PMC5348883.

111: Mohammed BH, Johnston JM, Harwell JI, Yi H, Tsang KW, Haidar JA. Intimate partner violence and utilization of maternal health care services in Addis Ababa, Ethiopia. *BMC Health Serv Res.* 2017 Mar 7;17(1):178. doi: 10.1186/s12913-017-2121-7. PubMed PMID: 28270137; PubMed Central PMCID: PMC5341201.

112: Fagerli K, O'Connor K, Kim S, Kelley M, Odhiambo A, Faith S, Otieno R, Nygren B, Kamb M, Quick R. Impact of the Integration of Water Treatment, Hygiene, Nutrition, and Clean Delivery Interventions on Maternal Health Service Use. *Am J*

Trop Med Hyg. 2017 May;96(5):1253-1260. doi: 10.4269/ajtmh.16-0709. Epub 2017 Feb

13. PubMed PMID: 28193744; PubMed Central PMCID: PMC5417226.

113: Tadele N, Lamaro T. Utilization of institutional delivery service and associated factors in Bench Maji zone, Southwest Ethiopia: community based, cross sectional study. BMC Health Serv Res. 2017 Feb 1;17(1):101. doi: 10.1186/s12913-017-2057-y. PubMed PMID: 28143513; PubMed Central PMCID: PMC5286839.

114: Freidoony L, Ranabhat CL, Kim CB, Kim CS, Ahn DW, Doh YA. Predisposing, enabling, and need factors associated with utilization of institutional delivery services: A community-based cross-sectional study in far-western Nepal. Women Health. 2018 Jan;58(1):51-71. doi: 10.1080/03630242.2016.1267689. Epub 2016 Dec 8. PubMed PMID: 27929757.

115: Amoakoh-Coleman M, Klipstein-Grobusch K, Agyepong IA, Kayode GA, Grobbee DE, Ansah EK. Provider adherence to first antenatal care guidelines and risk of pregnancy complications in public sector facilities: a Ghanaian cohort study. BMC Pregnancy Childbirth. 2016 Nov 24;16(1):369. PubMed PMID: 27881104; PubMed Central PMCID: PMC5121950.

116: Asseffa NA, Bukola F, Ayodele A. Determinants of use of health facility for childbirth in rural Hadiya zone, Southern Ethiopia. BMC Pregnancy Childbirth. 2016 Nov 16;16(1):355. PubMed PMID: 27852239; PubMed Central PMCID: PMC5112737.

117: Bonfrer I, Breebaart L, Van de Poel E. The Effects of Ghana's National Health Insurance Scheme on Maternal and Infant Health Care Utilization. PLoS One. 2016 Nov 11;11(11):e0165623. doi: 10.1371/journal.pone.0165623. eCollection 2016. PubMed PMID: 27835639; PubMed Central PMCID: PMC5106190.

118: Aduloju OP, Akintayo AA, Ade-Ojo IP, Awoleke JO, Aduloju T, Ogundare OR. Gestational age at initiation of antenatal care in a tertiary hospital, Southwestern Nigeria. Niger J Clin Pract. 2016 Nov-Dec;19(6):772-777. doi: 10.4103/1119-3077.181398. PubMed PMID: 27811450.

119: Adoyo MA, Mbakaya C, Nyambati V, Kombe Y. Retrospective cohort study on risk factors for development of gestational diabetes among mothers attending antenatal clinics in Nairobi County. Pan Afr Med J. 2016 Jun 22;24:155. eCollection 2016. PubMed PMID: 27795753; PubMed Central PMCID: PMC5072834.

120: Gage AJ, Ilombu O, Akinyemi AI. Service readiness, health facility management practices, and delivery care utilization in five states of Nigeria: a cross-sectional analysis. BMC Pregnancy Childbirth. 2016 Oct 6;16(1):297. PubMed PMID: 27716208; PubMed Central PMCID: PMC5054586.

121: Derso A, Nibret E, Munshea A. Prevalence of intestinal parasitic infections and associated risk factors among pregnant women attending antenatal care center at Felege Hiwot Referral Hospital, northwest Ethiopia. BMC Infect Dis. 2016 Sep 30;16(1):530. PubMed PMID: 27716099; PubMed Central PMCID: PMC5045606.

122: Sakala J, Chizuni N, Nzala S. A study on usefulness of a set of known risk factors in predicting maternal syphilis infections in three districts of Western Province, Zambia. *Pan Afr Med J*. 2016 May 24;24:75. eCollection 2016. PubMed PMID: 27703597; PubMed Central PMCID: PMC5031372.

123: Owili PO, Muga MA, Chou YJ, Hsu YE, Huang N, Chien LY. Relationship between women's characteristics and continuum of care for maternal health in Kenya: Complex survey analysis using structural equation modeling. *Women Health*. 2017 Sep;57(8):942-961. doi: 10.1080/03630242.2016.1222327. Epub 2016 Aug 11. PubMed PMID: 27613111.

124: Assefa E, Tadesse M. Factors related to the use of antenatal care services in Ethiopia: Application of the zero-inflated negative binomial model. *Women Health*. 2017 Aug;57(7):804-821. doi: 10.1080/03630242.2016.1222325. Epub 2016 Aug 11. PubMed PMID: 27602998.

125: Girmaye M, Berhan Y. Skilled Antenatal Care Service Utilization and Its Association with the Characteristics of Women's Health Development Team in Yeky District, South-West Ethiopia: A Multilevel Analysis. *Ethiop J Health Sci*. 2016 Jul;26(4):369-80. PubMed PMID: 27587935; PubMed Central PMCID: PMC4992777.

126: Thogarapalli N, Mkandawire P, Kangmennaang J, Luginaah I, Arku G. Gestational age at first antenatal visit in Namibia. *Int J Public Health*. 2016



Dec;61(9):1089-1097. Epub 2016 Sep 1. PubMed PMID: 27586036.

127: Butali A, Ezeaka C, Ekhaguere O, Weathers N, Ladd J, Fajolu I, Esezobor C, Makwe C, Odusanya B, Anorlu R, Adeyemo W, Iroha E, Egri-Okwaji M, Adejumo P, Oyeneyin L, Abiodun M, Badejoko B, Ryckman K. Characteristics and risk factors of preterm births in a tertiary center in Lagos, Nigeria. *Pan Afr Med J.* 2016 May 1;24:1. doi: 10.11604/pamj.2016.24.1.8382. eCollection 2016. PubMed PMID: 27583065; PubMed Central PMCID: PMC4992393.

128: Adedire EB, Ajayi I, Fawole OI, Ajumobi O, Kasasa S, Wasswa P, Nguku P. Immunisation coverage and its determinants among children aged 12-23 months in Atakumosa-west district, Osun State Nigeria: a cross-sectional study. *BMC Public Health.* 2016 Aug 30;16:905. doi: 10.1186/s12889-016-3531-x. PubMed PMID: 27578303; PubMed Central PMCID: PMC5006522.

129: Wilunda C, Tanaka S, Putoto G, Tsegaye A, Kawakami K. Evaluation of a maternal health care project in South West Shoa Zone, Ethiopia: before-and-after comparison. *Reprod Health.* 2016 Aug 20;13(1):95. doi: 10.1186/s12978-016-0213-1. PubMed PMID: 27543121; PubMed Central PMCID: PMC4992297.

130: Mohammed F, Musa A, Amano A. Prevalence and determinants of unintended pregnancy among pregnant woman attending ANC at Gelemso General Hospital, Oromiya Region, East Ethiopia: a facility based cross-sectional study. *BMC Womens Health.* 2016 Aug 17;16(1):56. doi: 10.1186/s12905-016-0335-1. PubMed PMID: 27534851; PubMed Central PMCID: PMC4989486.

131: Martin SL, Omotayo MO, Chapleau GM, Stoltzfus RJ, Birhanu Z, Ortolano SE, Pelto GH, Dickin KL. Adherence partners are an acceptable behaviour change strategy to support calcium and iron-folic acid supplementation among pregnant women in Ethiopia and Kenya. *Matern Child Nutr.* 2017 Jul;13(3). doi: 10.1111/mcn.12331. Epub 2016 Aug 9. PubMed PMID: 27507135.

132: Tinago CB, Annang Ingram L, Blake CE, Frongillo EA. Individual and structural environmental influences on utilization of iron and folic acid supplementation among pregnant women in Harare, Zimbabwe. *Matern Child Nutr.* 2017 Jul;13(3). doi: 10.1111/mcn.12350. Epub 2016 Aug 9. PubMed PMID: 27502366.

133: Ngonzi J, Tornes YF, Mukasa PK, Salongo W, Kabakyenga J, Sezalio M, Wouters K, Jacquem Y, Van Geertruyden JP. Puerperal sepsis, the leading cause of maternal deaths at a Tertiary University Teaching Hospital in Uganda. *BMC Pregnancy Childbirth.* 2016 Aug 5;16(1):207. doi: 10.1186/s12884-016-0986-9. PubMed PMID: 27495904; PubMed Central PMCID: PMC4974713.

134: Rogers AJ, Weke E, Kwena Z, Bukusi EA, Oyaro P, Cohen CR, Turan JM. Implementation of repeat HIV testing during pregnancy in Kenya: a qualitative study. *BMC Pregnancy Childbirth.* 2016 Jul 11;16(1):151. doi: 10.1186/s12884-016-0936-6. PubMed PMID: 27401819; PubMed Central PMCID: PMC4940827.

135: Shiferaw S, Spigt M, Tekie M, Abdullah M, Fantahun M, Dinant GJ. The Effects of a Locally Developed mHealth Intervention on Delivery and Postnatal Care Utilization; A Prospective Controlled Evaluation among Health Centres in Ethiopia. PLoS One. 2016 Jul 6;11(7):e0158600. doi: 10.1371/journal.pone.0158600. eCollection 2016. PubMed PMID: 27383186; PubMed Central PMCID: PMC4934867.

136: Alemu T, Umeta M. Prevalence and Predictors of "Small Size" Babies in Ethiopia: In-depth Analysis of the Ethiopian Demographic and Health Survey, 2011. Ethiop J Health Sci. 2016 May;26(3):243-50. PubMed PMID: 27358545; PubMed Central PMCID: PMC4913192.

137: Munguambe K, Boene H, Vidler M, Bique C, Sawchuck D, Firoz T, Makanga PT, Qureshi R, Macete E, Menéndez C, von Dadelszen P, Sevens E. Barriers and facilitators to health care seeking behaviours in pregnancy in rural communities of southern Mozambique. Reprod Health. 2016 Jun 8;13 Suppl 1:31. doi: 10.1186/s12978-016-0141-0. PubMed PMID: 27356968; PubMed Central PMCID: PMC4943506.

138: Benzouina S, Boubkraoui Mel-M, Mrabet M, Chahid N, Kharbach A, El-Hassani A, Barkat A. Fetal outcome in emergency versus elective cesarean sections at Souissi Maternity Hospital, Rabat, Morocco. Pan Afr Med J. 2016 Apr 15;23:197. doi: 10.11604/pamj.2016.23.197.7401. eCollection 2016. PubMed PMID: 27347286; PubMed Central PMCID: PMC4907743.

139: Bayou YT, Mashalla YS, Thupayagale-Tshweneagae G. The adequacy of antenatal

care services among slum residents in Addis Ababa, Ethiopia. *BMC Pregnancy Childbirth*. 2016 Jun 15;16(1):142. doi: 10.1186/s12884-016-0930-z. PubMed PMID: 27306253; PubMed Central PMCID: PMC4908857.

140: Maina JM, Kithuka P, Tororei S. Perceptions and uptake of health insurance for maternal care in rural Kenya: a cross sectional study. *Pan Afr Med J*. 2016 Mar 25;23:125. doi: 10.11604/pamj.2016.23.125.8936. eCollection 2016. PubMed PMID: 27279952; PubMed Central PMCID: PMC4885689.

141: Maseresha N, Woldemichael K, Dube L. Knowledge of obstetric danger signs and associated factors among pregnant women in Erer district, Somali region, Ethiopia. *BMC Womens Health*. 2016 Jun 6;16:30. doi: 10.1186/s12905-016-0309-3. PubMed PMID: 27265154; PubMed Central PMCID: PMC4893837.

142: Afulani PA. Determinants of stillbirths in Ghana: does quality of antenatal care matter? *BMC Pregnancy Childbirth*. 2016 Jun 2;16(1):132. doi: 10.1186/s12884-016-0925-9. PubMed PMID: 27255155; PubMed Central PMCID: PMC4891927.

143: Tshibumbu DD, Blitz J. Modifiable antenatal risk factors for stillbirth amongst pregnant women in the Omusati region, Namibia. *Afr J Prim Health Care Fam Med*. 2016 May 11;8(1):e1-6. doi: 10.4102/phcfm.v8i1.1054. PubMed PMID: 27247156; PubMed Central PMCID: PMC4913446.

144: Saad-Haddad G, DeJong J, Terreri N, Restrepo-Méndez MC, Perin J, Vaz L, Newby H, Amouzou A, Barros AJ, Bryce J. Patterns and determinants of antenatal care utilization: analysis of national survey data in seven countdown countries. *J Glob Health*. 2016 Jun;6(1):010404. doi: 10.7189/jogh.06.010404. PubMed PMID: 27231540; PubMed Central PMCID: PMC4871063.

145: Titilayo A, Palamuleni ME, Omisakin O. Sociodemographic factors influencing adherence to antenatal iron supplementation recommendations among pregnant women in Malawi: Analysis of data from the 2010 Malawi Demographic and Health Survey. *Malawi Med J*. 2016 Mar;28(1):1-5. PubMed PMID: 27217909; PubMed Central PMCID: PMC4864384.

146: Luginaah IN, Kangmennaang J, Fallah M, Dahn B, Kateh F, Nyenswah T. Timing and utilization of antenatal care services in Liberia: Understanding the pre-Ebola epidemic context. *Soc Sci Med*. 2016 Jul;160:75-86. doi: 10.1016/j.socscimed.2016.05.019. Epub 2016 May 12. PubMed PMID: 27214711.

147: Owili PO, Muga MA, Chou YJ, Hsu YH, Huang N, Chien LY. Family Structure Types and Adequate Utilization of Antenatal Care in Kenya. *Fam Community Health*. 2016 Jul-Sep;39(3):188-98. doi: 10.1097/FCH.000000000000109. PubMed PMID: 27214674.

148: Larsen A, Exavery A, Phillips JF, Tani K, Kanté AM. Predictors of Health Care Seeking Behavior During Pregnancy, Delivery, and the Postnatal Period in Rural Tanzania. *Matern Child Health J*. 2016 Aug;20(8):1726-34. doi:

10.1007/s10995-016-1976-2. PubMed PMID: 27194528.

149: Zerfu TA, Umeta M, Baye K. Dietary diversity during pregnancy is associated with reduced risk of maternal anemia, preterm delivery, and low birth weight in a prospective cohort study in rural Ethiopia. *Am J Clin Nutr*. 2016 Jun;103(6):1482-8. doi: 10.3945/ajcn.115.116798. Epub 2016 May 11. PubMed PMID: 27169832.

150: Ochako R, Gichuhi W. Pregnancy wantedness, frequency and timing of antenatal care visit among women of childbearing age in Kenya. *Reprod Health*. 2016 May 4;13(1):51. doi: 10.1186/s12978-016-0168-2. PubMed PMID: 27142068; PubMed Central PMCID: PMC4855852.

151: Edvardsson K, Ntaganira J, Åhman A, Sengoma JP, Small R, Mogren I. Physicians' experiences and views on the role of obstetric ultrasound in rural and urban Rwanda: a qualitative study. *Trop Med Int Health*. 2016 Jul;21(7):895-906. doi: 10.1111/tmi.12718. Epub 2016 May 18. PubMed PMID: 27125579.

152: Ntambue AM, Malonga FK, Dramaix-Wilmet M, Ngatu RN, Donnen P. Better than nothing? maternal, newborn, and child health services and perinatal mortality, Lubumbashi, democratic republic of the Congo: a cohort study. *BMC Pregnancy Childbirth*. 2016 Apr 26;16:89. doi: 10.1186/s12884-016-0879-y. PubMed PMID: 27118184; PubMed Central PMCID: PMC4847211.

153: Okoh DA, Iyalla C, Omuakwe H, Iwo-Amah RS, Nwabuko C. A retrospective study of the prevalence of anaemia in pregnancy at booking in Niger Delta, Nigeria. *J Obstet Gynaecol*. 2016 Jul;36(5):594-7. doi: 10.3109/01443615.2015.1116500. Epub 2016 Apr 25. PubMed PMID: 27110932.

154: Owor MO, Matovu JKB, Murokora D, Wanyenze RK, Waiswa P. Factors associated with adoption of beneficial newborn care practices in rural Eastern Uganda: a cross-sectional study. *BMC Pregnancy Childbirth*. 2016 Apr 21;16:83. doi: 10.1186/s12884-016-0874-3. PubMed PMID: 27101821; PubMed Central PMCID: PMC4840909.

155: Ameh S, Adeleye OA, Kabiru CW, Agan T, Duke R, Mkpanam N, Nwoha D. Predictors of Poor Pregnancy Outcomes Among Antenatal Care Attendees in Primary Health Care Facilities in Cross River State, Nigeria: A Multilevel Model. *Matern Child Health J*. 2016 Aug;20(8):1662-72. doi: 10.1007/s10995-016-1965-5. PubMed PMID: 27004795; PubMed Central PMCID: PMC4935728.

156: Njom Nlend AE, Nga Motazé A, Moyo Tetang S, Zeudja C, Ngantcha M, Tejiokem M. Preterm Birth and Low Birth Weight after In Utero Exposure to Antiretrovirals Initiated during Pregnancy in Yaoundé, Cameroon. *PLoS One*. 2016 Mar 21;11(3):e0150565. doi: 10.1371/journal.pone.0150565. eCollection 2016. PubMed PMID: 26999744; PubMed Central PMCID: PMC4801361.

157: Browne JL, Kayode GA, Arhinful D, Fidler SA, Grobbee DE, Klipstein-Grobusch

K. Health insurance determines antenatal, delivery and postnatal care

utilisation: evidence from the Ghana Demographic and Health Surveillance data.

BMJ Open. 2016 Mar 18;6(3):e008175. doi: 10.1136/bmjopen-2015-008175. PubMed

PMID: 26993621; PubMed Central PMCID: PMC4800135.

158: Kalter HD, Yaroh AG, Maina A, Koffi AK, Bensaïd K, Amouzou A, Black RE.

Verbal/social autopsy study helps explain the lack of decrease in neonatal

mortality in Niger, 2007-2010. J Glob Health. 2016 Jun;6(1):010604. doi:

10.7189/jogh.06.010604. PubMed PMID: 26955474; PubMed Central PMCID: PMC4766793.

159: Kananura RM, Tetui M, Mutebi A, Bua JN, Waiswa P, Kiwanuka SN,

Ekirapa-Kiracho E, Makumbi F. The neonatal mortality and its determinants in

rural communities of Eastern Uganda. Reprod Health. 2016 Feb 16;13:13. doi:

10.1186/s12978-016-0119-y. PubMed PMID: 26883425; PubMed Central PMCID:

PMC4756421.

160: Muhwava LS, Morojele N, London L. Psychosocial factors associated with early

initiation and frequency of antenatal care (ANC) visits in a rural and urban

setting in South Africa: a cross-sectional survey. BMC Pregnancy Childbirth. 2016

Jan 25;16:18. doi: 10.1186/s12884-016-0807-1. PubMed PMID: 26810320; PubMed

Central PMCID: PMC4727269.

161: Ayanore MA, Pavlova M, Groot W. Unmet reproductive health needs among women

in some West African countries: a systematic review of outcome measures and

determinants. Reprod Health. 2016 Jan 16;13:5. doi: 10.1186/s12978-015-0104-x.



Review. PubMed PMID: 26774502; PubMed Central PMCID: PMC4715869.

162: Nnko S, Chagalucha J, Mosha J, Bunga C, Wamoyi J, Peeling R, Mabey D. Perceptions, attitude and uptake of rapid syphilis testing services in antenatal clinics in North-Western Tanzania. *Health Policy Plan*. 2016 Jun;31(5):667-73. doi: 10.1093/heapol/czv116. Epub 2015 Dec 17. PubMed PMID: 26685146.

163: Kawooya MG, Nathan RO, Swanson J, Swanson DL, Namulema E, Ankunda R, Kirumira F, Ddungu-Matovu P. Impact of Introducing Routine Antenatal Ultrasound Services on Reproductive Health Indicators in Mpigi District, Central Uganda. *Ultrasound Q*. 2015 Dec;31(4):285-9. doi: 10.1097/RUQ.0000000000000142. PubMed PMID: 26656991.

164: Tekelab T, Yadecha B, Melka AS. Antenatal care and women's decision making power as determinants of institutional delivery in rural area of Western Ethiopia. *BMC Res Notes*. 2015 Dec 11;8:769. doi: 10.1186/s13104-015-1708-5. PubMed PMID: 26651489; PubMed Central PMCID: PMC4676818.

165: Dahiru T, Oche OM. Determinants of antenatal care, institutional delivery and postnatal care services utilization in Nigeria. *Pan Afr Med J*. 2015 Aug 31;21:321. doi: 10.11604/pamj.2015.21.321.6527. eCollection 2015. PubMed PMID: 26587168; PubMed Central PMCID: PMC4633744.

166: Anastasi E, Borchert M, Campbell OM, Sondorp E, Kaducu F, Hill O, Okeng D,

Odong VN, Lange IL. Losing women along the path to safe motherhood: why is there such a gap between women's use of antenatal care and skilled birth attendance? A mixed methods study in northern Uganda. *BMC Pregnancy Childbirth*. 2015 Nov 4;15:287. doi: 10.1186/s12884-015-0695-9. PubMed PMID: 26538084; PubMed Central PMCID: PMC4632272.

167: Khan SM, Singh K. The Association Between Health Insurance Coverage and Skilled Birth Attendance in Ghana: A National Study. *Matern Child Health J*. 2016 Mar;20(3):534-41. doi: 10.1007/s10995-015-1851-6. PubMed PMID: 26525559; PubMed Central PMCID: PMC5863540.

168: Balogun OO, Kobayashi S, Anigo KM, Ota E, Asakura K, Sasaki S. Factors Influencing Exclusive Breastfeeding in Early Infancy: A Prospective Study in North Central Nigeria. *Matern Child Health J*. 2016 Feb;20(2):363-75. doi: 10.1007/s10995-015-1835-6. PubMed PMID: 26520155.

169: Asiki G, Baisley K, Newton R, Marions L, Seeley J, Kamali A, Smedman L. Adverse pregnancy outcomes in rural Uganda (1996-2013): trends and associated factors from serial cross sectional surveys. *BMC Pregnancy Childbirth*. 2015 Oct 29;15:279. doi: 10.1186/s12884-015-0708-8. PubMed PMID: 26515763; PubMed Central PMCID: PMC4627380.

170: Biratu A, Haile D. Prevalence of antenatal depression and associated factors among pregnant women in Addis Ababa, Ethiopia: a cross-sectional study. *Reprod Health*. 2015 Oct 30;12:99. doi: 10.1186/s12978-015-0092-x. PubMed PMID: 26514827;

PubMed Central PMCID: PMC4627391.

171: Gudayu TW. Proportion and Factors Associated with late Antenatal Care Booking among Pregnant Mothers in Gondar Town, North West Ethiopia. *Afr J Reprod Health*. 2015 Jun;19(2):94-100. PubMed PMID: 26506661.

172: Escamilla V, Chibwesha CJ, Gartland M, Chintu N, Mubiana-Mbewe M, Musokotwane K, Musonda P, Miller WC, Stringer JS, Chi BH. Implementation and Operational Research: Distance From Household to Clinic and Its Association With the Uptake of Prevention of Mother-to-Child HIV Transmission Regimens in Rural Zambia. *J Acquir Immune Defic Syndr*. 2015 Nov 1;70(3):e94-e101. doi: 10.1097/QAI.0000000000000739. PubMed PMID: 26470035; PubMed Central PMCID: PMC4885744.

173: Demelash H, Motbainor A, Nigatu D, Gashaw K, Melese A. Risk factors for low birth weight in Bale zone hospitals, South-East Ethiopia : a case-control study. *BMC Pregnancy Childbirth*. 2015 Oct 13;15:264. doi: 10.1186/s12884-015-0677-y. PubMed PMID: 26463177; PubMed Central PMCID: PMC4604703.

174: Macheke GS, Philemon RN, Onoko O, Mlay PS, Masenga G, Obure J, Mahande MJ. Frequency, risk factors and feto-maternal outcomes of abruptio placentae in Northern Tanzania: a registry-based retrospective cohort study. *BMC Pregnancy Childbirth*. 2015 Oct 7;15:242. doi: 10.1186/s12884-015-0678-x. PubMed PMID: 26446879; PubMed Central PMCID: PMC4597387.

175: Nakua EK, Sevugu JT, Dzomeku VM, Otupiri E, Lipkovich HR, Owusu-Dabo E. Home birth without skilled attendants despite millennium villages project intervention in Ghana: insight from a survey of women's perceptions of skilled obstetric care. *BMC Pregnancy Childbirth*. 2015 Oct 7;15:243. doi: 10.1186/s12884-015-0674-1. PubMed PMID: 26446145; PubMed Central PMCID: PMC4597447.

176: Mustafa MH, Mukhtar AM. Factors associated with antenatal and delivery care in Sudan: analysis of the 2010 Sudan household survey. *BMC Health Serv Res*. 2015 Oct 4;15:452. doi: 10.1186/s12913-015-1128-1. PubMed PMID: 26433875; PubMed Central PMCID: PMC4592751.

177: Wilunda C, Quaglio G, Putoto G, Takahashi R, Calia F, Abebe D, Manenti F, Dalla Riva D, Betrán AP, Atzori A. Determinants of utilisation of antenatal care and skilled birth attendant at delivery in South West Shoa Zone, Ethiopia: a cross sectional study. *Reprod Health*. 2015 Aug 25;12:74. doi: 10.1186/s12978-015-0067-y. PubMed PMID: 26432298; PubMed Central PMCID: PMC4592558.

178: Abadura SA, Lerebo WT, Kulkarni U, Mekonnen ZA. Individual and community level determinants of childhood full immunization in Ethiopia: a multilevel analysis. *BMC Public Health*. 2015 Sep 28;15:972. doi: 10.1186/s12889-015-2315-z. PubMed PMID: 26415507; PubMed Central PMCID: PMC4587824.

179: Mageda K, Mmbaga EJ. Prevalence and predictors of institutional delivery

among pregnant mothers in Biharamulo district, Tanzania: a cross-sectional study.

Pan Afr Med J. 2015 May 25;21:51. doi: 10.11604/pamj.2015.21.51.6347. eCollection

2015. PubMed PMID: 26405487; PubMed Central PMCID: PMC4564411.

180: Tebeu PM, Halle-Ekane G, Da Itambi M, Enow Mbu R, Mawamba Y, Fomulu JN.

Maternal mortality in Cameroon: a university teaching hospital report. Pan Afr

Med J. 2015 May 7;21:16. doi: 10.11604/pamj.2015.21.16.3912. eCollection 2015.

Erratum in: Pan Afr Med J. 2015;22:377. Pierre-Marie, Tebeu [corrected to Tebeu,

Pierre-Marie]; Gregory, Halle-Ekane [corrected to Halle-Ekane, Gregory]; Maxwell,

Da Itambi [corrected to Da Itambi, Maxwell]; Robinson, Enow Mbu [corrected to

Enow Mbu, Robinson]; Yvette, Mawamba [corrected to Mawa. PubMed PMID: 26401210;

PubMed Central PMCID: PMC4561158.

181: Liu G, Segrè J, Gülmezoglu A, Mathai M, Smith JM, Hermida J, Simen-Kapeu A,

Barker P, Jere M, Moses E, Moxon SG, Dickson KE, Lawn JE, Althabe F; Working

Group for UN Commission of Life Saving Commodities Antenatal Corticosteroids.

Antenatal corticosteroids for management of preterm birth: a multi-country

analysis of health system bottlenecks and potential solutions. BMC Pregnancy

Childbirth. 2015;15 Suppl 2:S3. doi: 10.1186/1471-2393-15-S2-S3. Epub 2015 Sep

11. PubMed PMID: 26390927; PubMed Central PMCID: PMC4577756.

182: Gebre M, Gebremariam A, Abebe TA. Birth Preparedness and Complication

Readiness among Pregnant Women in Duguna Fango District, Wolayta Zone, Ethiopia.

PLoS One. 2015 Sep 17;10(9):e0137570. doi: 10.1371/journal.pone.0137570.

eCollection 2015. PubMed PMID: 26379231; PubMed Central PMCID: PMC4574761.

183: Bayu H, Fisseha G, Mulat A, Yitayih G, Wolday M. Missed opportunities for institutional delivery and associated factors among urban resident pregnant women in South Tigray Zone, Ethiopia: a community-based follow-up study. *Glob Health Action*. 2015 Sep 9;8:28082. doi: 10.3402/gha.v8.28082. eCollection 2015. PubMed PMID: 26361348; PubMed Central PMCID: PMC4565844.

184: Dutamo Z, Assefa N, Egata G. Maternal health care use among married women in Hossaina, Ethiopia. *BMC Health Serv Res*. 2015 Sep 10;15:365. doi: 10.1186/s12913-015-1047-1. PubMed PMID: 26358062; PubMed Central PMCID: PMC4566845.

185: John CO, Orazulike N, Alegbeleye J. AN APPRAISAL OF RETAINED PLACENTA AT THE UNIVERSITY OF PORT HARCOURT TEACHING HOSPITAL: A FIVE-YEAR REVIEW. *Niger J Med*. 2015 Apr-Jun;24(2):99-102. PubMed PMID: 26353418.

186: Aryeetey R, Aikins M, Dako-Gyeke P, Adongo PB. Pathways Utilized for Antenatal Health Seeking Among Women in the Ga East District, Ghana. *Ghana Med J*. 2015 Mar;49(1):44-9. PubMed PMID: 26339084; PubMed Central PMCID: PMC4549820.

187: Isaksen AB, Østbye T, Mmbaga BT, Daltveit AK. Alcohol consumption among pregnant women in Northern Tanzania 2000-2010: a registry-based study. *BMC Pregnancy Childbirth*. 2015 Sep 3;15:205. doi: 10.1186/s12884-015-0630-0. PubMed PMID: 26337194; PubMed Central PMCID: PMC4559883.

188: Zenebe Y, Mulu W, Yimer M, Abera B. Sero-prevalence and risk factors of hepatitis C virus infection among pregnant women in Bahir Dar city, Northwest Ethiopia: cross sectional study. *Pan Afr Med J*. 2015 Jun 25;21:158. doi: 10.11604/pamj.2015.21.158.6367. eCollection 2015. PubMed PMID: 26327995; PubMed Central PMCID: PMC4546802.

189: Kambala C, Lohmann J, Mazalale J, Brenner S, De Allegri M, Muula AS, Sarker M. How do Malawian women rate the quality of maternal and newborn care? Experiences and perceptions of women in the central and southern regions. *BMC Pregnancy Childbirth*. 2015 Aug 15;15:169. doi: 10.1186/s12884-015-0560-x. PubMed PMID: 26275999; PubMed Central PMCID: PMC4537589.

190: John B, David M, Mathias L, Elizabeth N. Risk factors and practices contributing to newborn sepsis in a rural district of Eastern Uganda, August 2013: a cross sectional study. *BMC Res Notes*. 2015 Aug 9;8:339. doi: 10.1186/s13104-015-1308-4. PubMed PMID: 26254874; PubMed Central PMCID: PMC4529696.

191: Oyewale TO, Mavundla TR. Socioeconomic factors contributing to exclusion of women from maternal health benefit in Abuja, Nigeria. *Curationis*. 2015 Jul 21;38(1). doi: 10.4102/curationis.v38i1.1272. PubMed PMID: 26244461; PubMed Central PMCID: PMC6091667.

192: Abeje G, Admasie C, Wasie B. Factors associated with self medication

practice among pregnant mothers attending antenatal care at governmental health centers in Bahir Dar city administration, Northwest Ethiopia, a cross sectional study. *Pan Afr Med J*. 2015 Mar 20;20:276. doi: 10.11604/pamj.2015.20.276.4243. eCollection 2015. PubMed PMID: 26161199; PubMed Central PMCID: PMC4483357.

193: Boamah SA, Amoyaw J, Luginaah I. EXPLAINING THE GAP IN ANTENATAL CARE SERVICE UTILIZATION BETWEEN YOUNGER AND OLDER MOTHERS IN GHANA. *J Biosoc Sci*. 2016 May;48(3):342-57. doi: 10.1017/S0021932015000218. Epub 2015 Jul 10. PubMed PMID: 26160032.

194: Mkandawire P. Gestational Age at First Antenatal Care Visit in Malawi. *Matern Child Health J*. 2015 Nov;19(11):2366-74. doi: 10.1007/s10995-015-1754-6. PubMed PMID: 26152889.

195: Woldesenbet S, Jackson D, Lombard C, Dinh TH, Puren A, Sherman G, Ramokolo V, Doherty T, Mogashoa M, Bhardwaj S, Chopra M, Shaffer N, Pillay Y, Goga A; South African PMTCT Evaluation (SAPMCTE) Team. Missed Opportunities along the Prevention of Mother-to-Child Transmission Services Cascade in South Africa: Uptake, Determinants, and Attributable Risk (the SAPMCTE). *PLoS One*. 2015 Jul 6;10(7):e0132425. doi: 10.1371/journal.pone.0132425. eCollection 2015. PubMed PMID: 26147598; PubMed Central PMCID: PMC4492960.

196: Katz J, Lee AC, Kozuki N, Black RE. Mortality Risk among Term and Preterm Small for Gestational Age Infants. *Nestle Nutr Inst Workshop Ser*. 2015;81:29-35. doi: 10.1159/000365800. Epub 2015 Jun 16. PubMed PMID: 26111561.



197: Sukums F, Mensah N, Mpembeni R, Massawe S, Duysburgh E, Williams A, Kaltschmidt J, Loukanova S, Haefeli WE, Blank A. Promising adoption of an electronic clinical decision support system for antenatal and intrapartum care in rural primary healthcare facilities in sub-Saharan Africa: The QUALMAT experience. *Int J Med Inform*. 2015 Sep;84(9):647-57. doi: 10.1016/j.ijmedinf.2015.05.002. Epub 2015 Jun 3. PubMed PMID: 26073076.

198: Althabe F, Moore JL, Gibbons L, Berrueta M, Goudar SS, Chomba E, Derman RJ, Patel A, Saleem S, Pasha O, Esamai F, Garces A, Liechty EA, Hambidge K, Krebs NF, Hibberd PL, Goldenberg RL, Koso-Thomas M, Carlo WA, Cafferata ML, Buekens P, McClure EM. Adverse maternal and perinatal outcomes in adolescent pregnancies: The Global Network's Maternal Newborn Health Registry study. *Reprod Health*. 2015;12 Suppl 2:S8. doi: 10.1186/1742-4755-12-S2-S8. Epub 2015 Jun 8. PubMed PMID: 26063350; PubMed Central PMCID: PMC4464033.

199: Koffi AK, Mleme T, Nsona H, Banda B, Amouzou A, Kalter HD. Social autopsy of neonatal mortality suggests needed improvements in maternal and neonatal interventions in Balaka and Salima districts of Malawi. *J Glob Health*. 2015 Jun;5(1):010416. PubMed PMID: 27698997; PubMed Central PMCID: PMC5032326.

200: Awungafac G, Njukeng PA, Ndasi JA, Mbuagbaw LT. Prevention of mother-to-child transmission of the Human Immunodeficiency Virus: investigating the uptake and utilization of maternal and child health services in Tiko health district, Cameroon. *Pan Afr Med J*. 2015 Jan 7;20:20. doi:

10.11604/pamj.2015.20.20.5137. eCollection 2015. PubMed PMID: 25995817; PubMed Central PMCID: PMC4431405.

201: Haile D, Biadgilign S, Azage M. Differentials in vitamin A supplementation among preschool-aged children in Ethiopia: evidence from the 2011 Ethiopian Demographic and Health Survey. *Public Health*. 2015 Jun;129(6):748-54. doi: 10.1016/j.puhe.2015.03.001. Epub 2015 May 14. PubMed PMID: 25982948.

202: Turan JM, Onono M, Steinfeld RL, Shade SB, Owuor K, Washington S, Bukusi EA, Ackers ML, Kioko J, Interis EC, Cohen CR. Implementation and Operational Research: Effects of Antenatal Care and HIV Treatment Integration on Elements of the PMTCT Cascade: Results From the SHAIP Cluster-Randomized Controlled Trial in Kenya. *J Acquir Immune Defic Syndr*. 2015 Aug 15;69(5):e172-81. doi: 10.1097/QAI.0000000000000678. PubMed PMID: 25967269; PubMed Central PMCID: PMC4501892.

203: Pathirana J, Nkambule J, Black S. Determinants of maternal immunization in developing countries. *Vaccine*. 2015 Jun 12;33(26):2971-7. doi: 10.1016/j.vaccine.2015.04.070. Epub 2015 Apr 30. PubMed PMID: 25936666.

204: Davies-Tuck M, Yim C, Knight M, Hodges R, Doery JC, Wallace E. Vitamin D testing in pregnancy: Does one size fit all? *Aust N Z J Obstet Gynaecol*. 2015 Apr;55(2):149-55. doi: 10.1111/ajo.12278. Epub 2015 Apr 21. PubMed PMID: 25900732.

205: Washington S, Owuor K, Turan JM, Steinfeld RL, Onono M, Shade SB, Bukusi EA, Ackers ML, Cohen CR. Implementation and Operational Research: Effect of Integration of HIV Care and Treatment Into Antenatal Care Clinics on Mother-to-Child HIV Transmission and Maternal Outcomes in Nyanza, Kenya: Results From the SHAIP Cluster Randomized Controlled Trial. *J Acquir Immune Defic Syndr*. 2015 Aug 15;69(5):e164-71. doi: 10.1097/QAI.0000000000000656. PubMed PMID: 25886930; PubMed Central PMCID: PMC4837126.

206: Mason L, Dellicour S, Ter Kuile F, Ouma P, Phillips-Howard P, Were F, Laserson K, Desai M. Barriers and facilitators to antenatal and delivery care in western Kenya: a qualitative study. *BMC Pregnancy Childbirth*. 2015 Feb 13;15:26. doi: 10.1186/s12884-015-0453-z. PubMed PMID: 25886593; PubMed Central PMCID: PMC4358726.

207: Mekonen HK, Nigatu B, Lamers WH. Birth weight by gestational age and congenital malformations in Northern Ethiopia. *BMC Pregnancy Childbirth*. 2015 Mar 29;15:76. doi: 10.1186/s12884-015-0507-2. PubMed PMID: 25886401; PubMed Central PMCID: PMC4381366.

208: Legesse E, Dechasa W. An assessment of child immunization coverage and its determinants in Sinana District, Southeast Ethiopia. *BMC Pediatr*. 2015 Apr 1;15:31. doi: 10.1186/s12887-015-0345-4. PubMed PMID: 25886255; PubMed Central PMCID: PMC4438454.

209: Mugo NS, Dibley MJ, Agho KE. Prevalence and risk factors for non-use of antenatal care visits: analysis of the 2010 South Sudan household survey. *BMC Pregnancy Childbirth*. 2015 Mar 26;15:68. doi: 10.1186/s12884-015-0491-6. PubMed PMID: 25885187; PubMed Central PMCID: PMC4396873.

210: Tessema GA, Tekeste A, Ayele TA. Preeclampsia and associated factors among pregnant women attending antenatal care in Dessie referral hospital, Northeast Ethiopia: a hospital-based study. *BMC Pregnancy Childbirth*. 2015 Mar 29;15:73. doi: 10.1186/s12884-015-0502-7. PubMed PMID: 25880924; PubMed Central PMCID: PMC4392792.

211: Kruk ME, Hermosilla S, Larson E, Vail D, Chen Q, Mazuguni F, Byalugaba B, Mbaruku G. Who is left behind on the road to universal facility delivery? A cross-sectional multilevel analysis in rural Tanzania. *Trop Med Int Health*. 2015 Aug;20(8):1057-66. doi: 10.1111/tmi.12518. Epub 2015 Apr 30. PubMed PMID: 25877211; PubMed Central PMCID: PMC4490971.

212: Hemelaar J, Lim LN, Impey LW. The Impact of an ECV Service is Limited by Antenatal Breech Detection: A Retrospective Cohort Study. *Birth*. 2015 Jun;42(2):165-72. doi: 10.1111/birt.12162. Epub 2015 Apr 15. PubMed PMID: 25872703.

213: Ogbo FA, Agho KE, Page A. Determinants of suboptimal breastfeeding practices in Nigeria: evidence from the 2008 demographic and health survey. *BMC Public Health*. 2015 Mar 18;15:259. doi: 10.1186/s12889-015-1595-7. PubMed PMID:

25849731; PubMed Central PMCID: PMC4367831.

214: Timša L, Marrone G, Ekirapa E, Waiswa P. Strategies for helping families prepare for birth: experiences from eastern central Uganda. *Glob Health Action*. 2015 Mar 31;8:23969. doi: 10.3402/gha.v8.23969. eCollection 2015. PubMed PMID: 25843492; PubMed Central PMCID: PMC4385208.

215: Fekadu M, Regassa N. Skilled delivery care service utilization in Ethiopia: analysis of rural-urban differentials based on national demographic and health survey (DHS) data. *Afr Health Sci*. 2014 Dec;14(4):974-84. doi: 10.4314/ahs.v14i4.29. PubMed PMID: 25834510; PubMed Central PMCID: PMC4370080.

216: Ansong E. The Association Between Household Consumer Durable Assets and Maternal Health-Seeking Behavior in Ghana. *Women Health*. 2015;55(5):485-504. doi: 10.1080/03630242.2015.1022815. Epub 2015 Apr 2. PubMed PMID: 25833407.

217: Abera Y, Mengesha ZB, Tessema GA. Postpartum contraceptive use in Gondar town, Northwest Ethiopia: a community based cross-sectional study. *BMC Womens Health*. 2015;15:19. doi: 10.1186/s12905-015-0178-1. Epub 2015 Feb 22. PubMed PMID: 25783651; PubMed Central PMCID: PMC4344775.

218: Ikeanyi EM, Ibrahim AI. Does antenatal care attendance prevent anemia in pregnancy at term? *Niger J Clin Pract*. 2015 May-Jun;18(3):323-7. doi: 10.4103/1119-3077.151730. PubMed PMID: 25772912.

219: Ganle JK. Ethnic disparities in utilisation of maternal health care services in Ghana: evidence from the 2007 Ghana Maternal Health Survey. *Ethn Health*. 2016;21(1):85-101. doi: 10.1080/13557858.2015.1015499. Epub 2015 Mar 2. PubMed PMID: 25728254.

220: Afulani PA. Rural/urban and socioeconomic differentials in quality of antenatal care in Ghana. *PLoS One*. 2015 Feb 19;10(2):e0117996. doi: 10.1371/journal.pone.0117996. eCollection 2015. PubMed PMID: 25695737; PubMed Central PMCID: PMC4335004.

221: Bayu H, Adefris M, Amano A, Abuhay M. Pregnant women's preference and factors associated with institutional delivery service utilization in Debra Markos Town, North West Ethiopia: a community based follow up study. *BMC Pregnancy Childbirth*. 2015 Feb 5;15:15. doi: 10.1186/s12884-015-0437-z. PubMed PMID: 25652361; PubMed Central PMCID: PMC4324647.

222: Nathan LM, Shi Q, Plewniak K, Zhang C, Nsabimana D, Sklar M, Mutimura E, Merkatz IR, Einstein MH, Anastos K. Decentralizing Maternity Services to Increase Skilled Attendance at Birth and Antenatal Care Utilization in Rural Rwanda: A Prospective Cohort Study. *Matern Child Health J*. 2015 Sep;19(9):1949-55. doi: 10.1007/s10995-015-1702-5. PubMed PMID: 25652061; PubMed Central PMCID: PMC4522213.

- 223: Rezk M, Marawan H, Dawood R, Masood A, Abo-Elnasr M. Prevalence and risk factors of iron-deficiency anaemia among pregnant women in rural districts of Menoufia governorate, Egypt. *J Obstet Gynaecol*. 2015;35(7):663-6. doi: 10.3109/01443615.2014.991289. Epub 2015 Feb 2. PubMed PMID: 25643259.
- 224: Mensah N, Sukums F, Awine T, Meid A, Williams J, Akweongo P, Kaltschmidt J, Haefeli WE, Blank A. Impact of an electronic clinical decision support system on workflow in antenatal care: the QUALMAT eCDSS in rural health care facilities in Ghana and Tanzania. *Glob Health Action*. 2015 Jan 27;8:25756. doi: 10.3402/gha.v8.25756. eCollection 2015. PubMed PMID: 25630707; PubMed Central PMCID: PMC4309829.
- 225: Ibrahim HK, El Borgy MD, Mohammed HO. Knowledge, attitude, and practices of pregnant women towards antenatal care in primary healthcare centers in Benghazi, Libya. *J Egypt Public Health Assoc*. 2014 Dec;89(3):119-26. doi: 10.1097/01.EPX.0000455673.91730.50. PubMed PMID: 25534176.
- 226: Melaku YA, Weldearegawi B, Tesfay FH, Abera SF, Abraham L, Aregay A, Ashebir Y, Eshetu F, Haile A, Lakew Y, Kinsman J. Poor linkages in maternal health care services-evidence on antenatal care and institutional delivery from a community-based longitudinal study in Tigray region, Ethiopia. *BMC Pregnancy Childbirth*. 2014 Dec 19;14:418. doi: 10.1186/s12884-014-0418-7. PubMed PMID: 25524400; PubMed Central PMCID: PMC4279812.
- 227: Gill MM, Machekano R, Isavwa A, Ahimsibwe A, Oyebanji O, Akintade OL, Tiam

A. The association between HIV status and antenatal care attendance among pregnant women in rural hospitals in Lesotho. *J Acquir Immune Defic Syndr*. 2015 Mar 1;68(3):e33-8. doi: 10.1097/QAI.0000000000000481. PubMed PMID: 25501608.

228: David E, Machungo F, Zanconato G, Cavaliere E, Fiosse S, Sululu C, Chiluvane B, Bergström S. Maternal near miss and maternal deaths in Mozambique: a cross-sectional, region-wide study of 635 consecutive cases assisted in health facilities of Maputo province. *BMC Pregnancy Childbirth*. 2014 Dec 10;14:401. doi: 10.1186/s12884-014-0401-3. PubMed PMID: 25491393; PubMed Central PMCID: PMC4269100.

229: Yego F, D'Este C, Byles J, Nyongesa P, Williams JS. A case-control study of risk factors for fetal and early neonatal deaths in a tertiary hospital in Kenya. *BMC Pregnancy Childbirth*. 2014 Nov 29;14:389. doi: 10.1186/s12884-014-0389-8. PubMed PMID: 25432735; PubMed Central PMCID: PMC4298961.

230: Omer K, Afi NJ, Baba MC, Adamu M, Malami SA, Oyo-Ita A, Cockcroft A, Andersson N. Seeking evidence to support efforts to increase use of antenatal care: a cross-sectional study in two states of Nigeria. *BMC Pregnancy Childbirth*. 2014 Nov 20;14:380. doi: 10.1186/s12884-014-0380-4. PubMed PMID: 25410003; PubMed Central PMCID: PMC4245780.

231: Kaaya S, Garcia ME, Li N, Lienert J, Twayigize W, Spiegelman D, Smith Fawzi MC. Association of maternal depression and infant nutritional status among women living with HIV in Tanzania. *Matern Child Nutr*. 2016 Jul;12(3):603-13. doi:



10.1111/mcn.12154. Epub 2014 Nov 8. PubMed PMID: 25382710; PubMed Central PMCID: PMC6240341.

232: Baron E, Field S, Kafaar Z, Honikman S. Patterns of use of a maternal mental health service in a low-resource antenatal setting in South Africa. *Health Soc Care Community*. 2015 Sep;23(5):502-12. doi: 10.1111/hsc.12167. Epub 2014 Oct 20. PubMed PMID: 25328059.

233: Dida N, Birhanu Z, Gerbaba M, Tilahun D, Morankar S. Modeling the probability of giving birth at health institutions among pregnant women attending antenatal care in West Shewa Zone, Oromia, Ethiopia: a cross sectional study. *Afr Health Sci*. 2014 Jun;14(2):288-98. doi: 10.4314/ahs.v14i2.3. PubMed PMID: 25320577; PubMed Central PMCID: PMC4196394.

234: Admasie C, Wasie B, Abeje G. Determinants of prescribed drug use among pregnant women in Bahir Dar city administration, Northwest Ethiopia: a cross sectional study. *BMC Pregnancy Childbirth*. 2014 Sep 18;14:325. doi: 10.1186/1471-2393-14-325. PubMed PMID: 25233893; PubMed Central PMCID: PMC4177766.

235: Singh K, Brodish P, Haney E. Postnatal care by provider type and neonatal death in sub-Saharan Africa: a multilevel analysis. *BMC Public Health*. 2014 Sep 10;14:941. doi: 10.1186/1471-2458-14-941. PubMed PMID: 25208951; PubMed Central PMCID: PMC4168199.

236: Natamba BK, Kilama H, Arbach A, Achan J, Griffiths JK, Young SL. Reliability and validity of an individually focused food insecurity access scale for assessing inadequate access to food among pregnant Ugandan women of mixed HIV status. *Public Health Nutr*. 2015 Nov;18(16):2895-905. doi: 10.1017/S1368980014001669. Epub 2014 Aug 29. PubMed PMID: 25171462.

237: Manzi A, Munyaneza F, Mujawase F, Banamwana L, Sayinzoga F, Thomson DR, Ntaganira J, Hedt-Gauthier BL. Assessing predictors of delayed antenatal care visits in Rwanda: a secondary analysis of Rwanda demographic and health survey 2010. *BMC Pregnancy Childbirth*. 2014 Aug 28;14:290. doi: 10.1186/1471-2393-14-290. PubMed PMID: 25163525; PubMed Central PMCID: PMC4152595.

238: Gudayu TW, Woldeyohannes SM, Abdo AA. Timing and factors associated with first antenatal care booking among pregnant mothers in Gondar Town; North West Ethiopia. *BMC Pregnancy Childbirth*. 2014 Aug 25;14:287. doi: 10.1186/1471-2393-14-287. PubMed PMID: 25154737; PubMed Central PMCID: PMC4152591.

239: Ha W, Salama P, Gwavuya S, Kanjala C. Is religion the forgotten variable in maternal and child health? Evidence from Zimbabwe. *Soc Sci Med*. 2014 Oct;118:80-8. doi: 10.1016/j.socscimed.2014.07.066. Epub 2014 Jul 31. PubMed PMID: 25108694.

- 240: Belayneh T, Adefris M, Andargie G. Previous early antenatal service utilization improves timely booking: cross-sectional study at university of Gondar hospital, northwest Ethiopia. *J Pregnancy*. 2014;2014:132494. doi: 10.1155/2014/132494. Epub 2014 Jul 1. PubMed PMID: 25101176; PubMed Central PMCID: PMC4102065.
- 241: Tura G, Afework MF, Yalew AW. The effect of birth preparedness and complication readiness on skilled care use: a prospective follow-up study in Southwest Ethiopia. *Reprod Health*. 2014 Aug 5;11:60. doi: 10.1186/1742-4755-11-60. PubMed PMID: 25091203; PubMed Central PMCID: PMC4127036.
- 242: Roberts S, Birgisson N, Julia Chang D, Koopman C. A pilot study on mobile phones as a means to access maternal health education in eastern rural Uganda. *J Telemed Telecare*. 2015 Jan;21(1):14-7. doi: 10.1177/1357633X14545433. Epub 2014 Jul 24. PubMed PMID: 25059242.
- 243: Kaso M, Addisse M. Birth preparedness and complication readiness in Robe Woreda, Arsi Zone, Oromia Region, Central Ethiopia: a cross-sectional study. *Reprod Health*. 2014 Jul 20;11:55. doi: 10.1186/1742-4755-11-55. PubMed PMID: 25038820; PubMed Central PMCID: PMC4118259.
- 244: Rossier C, Muindi K, Soura A, Mberu B, Lankoande B, Kabiru C, Millogo R. Maternal health care utilization in Nairobi and Ouagadougou: evidence from HDSS. *Glob Health Action*. 2014 Jul 9;7:24351. doi: 10.3402/gha.v7.24351. eCollection 2014. PubMed PMID: 25014187; PubMed Central PMCID: PMC4093672.

245: Utoo BT. Hepatitis B surface antigenemia (HBsAg) among pregnant women in southern Nigeria. *Afr Health Sci*. 2013 Dec;13(4):1139-43. doi: 10.4314/ahs.v13i4.39. PubMed PMID: 24940343; PubMed Central PMCID: PMC4056495.

246: Exavery A, Kanté AM, Njozi M, Tani K, Doctor HV, Hingora A, Phillips JF. Access to institutional delivery care and reasons for home delivery in three districts of Tanzania. *Int J Equity Health*. 2014 Jun 16;13:48. doi: 10.1186/1475-9276-13-48. PubMed PMID: 24934657; PubMed Central PMCID: PMC4069087.

247: Ononokpono DN, Azfredrick EC. Intimate partner violence and the utilization of maternal health care services in Nigeria. *Health Care Women Int*. 2014;35(7-9):973-89. doi: 10.1080/07399332.2014.924939. Epub 2014 Aug 8. PubMed PMID: 24902004.

248: El-Gilany AH, Abdel-Hady DM. Newborn first feed and prelacteal feeds in Mansoura, Egypt. *Biomed Res Int*. 2014;2014:258470. doi: 10.1155/2014/258470. Epub 2014 May 6. PubMed PMID: 24895560; PubMed Central PMCID: PMC4033417.

249: Tarekegn SM, Lieberman LS, Giedraitis V. Determinants of maternal health service utilization in Ethiopia: analysis of the 2011 Ethiopian Demographic and Health Survey. *BMC Pregnancy Childbirth*. 2014 May 7;14:161. doi: 10.1186/1471-2393-14-161. PubMed PMID: 24886529; PubMed Central PMCID: PMC4022978.

250: Hagos S, Shaweno D, Assegid M, Mekonnen A, Afework MF, Ahmed S. Utilization of institutional delivery service at Wukro and Butajera districts in the Northern and South Central Ethiopia. *BMC Pregnancy Childbirth*. 2014 May 28;14:178. doi: 10.1186/1471-2393-14-178. PubMed PMID: 24886375; PubMed Central PMCID: PMC4047000.

251: Wado YD, Afework MF, Hindin MJ. Effects of maternal pregnancy intention, depressive symptoms and social support on risk of low birth weight: a prospective study from southwestern Ethiopia. *PLoS One*. 2014 May 21;9(5):e96304. doi: 10.1371/journal.pone.0096304. eCollection 2014. PubMed PMID: 24848269; PubMed Central PMCID: PMC4029816.

252: Gayawan E. Spatial analysis of choice of place of delivery in Nigeria. *Sex Reprod Healthc*. 2014 Jun;5(2):59-67. doi: 10.1016/j.srhc.2014.01.004. Epub 2014 Feb 27. PubMed PMID: 24814440.

253: Tesfahun F, Worku W, Mazengiye F, Kifle M. Knowledge, perception and utilization of postnatal care of mothers in Gondar Zuria District, Ethiopia: a cross-sectional study. *Matern Child Health J*. 2014 Dec;18(10):2341-51. doi: 10.1007/s10995-014-1474-3. PubMed PMID: 24770953; PubMed Central PMCID: PMC4220106.

254: Shah R, Mullany LC, Darmstadt GL, Mannan I, Rahman SM, Talukder RR,

Applegate JA, Begum N, Mitra D, Arifeen SE, Baqui AH; ProjAHNMo Study Group in Bangladesh. Incidence and risk factors of preterm birth in a rural Bangladeshi cohort. *BMC Pediatr*. 2014 Apr 24;14:112. doi: 10.1186/1471-2431-14-112. PubMed PMID: 24758701; PubMed Central PMCID: PMC4021459.

255: Afework MF, Admassu K, Mekonnen A, Hagos S, Asegid M, Ahmed S. Effect of an innovative community based health program on maternal health service utilization in north and south central Ethiopia: a community based cross sectional study. *Reprod Health*. 2014 Apr 4;11:28. doi: 10.1186/1742-4755-11-28. PubMed PMID: 24708848; PubMed Central PMCID: PMC4041359.

256: Imade GE, Sagay AS, Musa J, Ocheke AN, Adeniyi DS, Idighri M, Powl R, Sendeht A, Ogwuche JP, Elujoba M, Egbodo CO, Oyeboode T, Daru PH, Agbaji O, Pam IC, Meloni ST, Okonkwo P, Kanki PJ. Declining rate of infection with maternal human immunodeficiency virus at delivery units in north-central Nigeria. *Afr J Reprod Health*. 2013 Dec;17(4 Spec No):138-45. PubMed PMID: 24689325.

257: Mashuda F, Zuechner A, Chalya PL, Kidenya BR, Manyama M. Pattern and factors associated with congenital anomalies among young infants admitted at Bugando medical centre, Mwanza, Tanzania. *BMC Res Notes*. 2014 Mar 29;7:195. doi: 10.1186/1756-0500-7-195. PubMed PMID: 24679067; PubMed Central PMCID: PMC3974194.

258: Chemir F, Alemseged F, Workneh D. Satisfaction with focused antenatal care service and associated factors among pregnant women attending focused antenatal care at health centers in Jimma town, Jimma zone, South West Ethiopia; a facility

based cross-sectional study triangulated with qualitative study. BMC Res Notes.

2014 Mar 19;7:164. doi: 10.1186/1756-0500-7-164. PubMed PMID: 24646407; PubMed

Central PMCID: PMC3994781.

259: Vindigni SM, Riley PL, Kimani F, Willy R, Warutere P, Sabatier JF, Kiriinya

R, Friedman M, Osumba M, Waudu AN, Rakuom C, Rogers M. Kenya's emergency-hire

nursing programme: a pilot evaluation of health service delivery in two

districts. Hum Resour Health. 2014 Mar 17;12:16. doi: 10.1186/1478-4491-12-16.

PubMed PMID: 24636052; PubMed Central PMCID: PMC4003900.

260: Bouafia N, Mahjoub M, Nouria A, Ben Aissa R, Saïdi H, Guedana N, Njah M.

[Epidemiology of high risk pregnancy in Sousse, Tunisia]. East Mediterr Health J.

2013 May;19(5):465-73. French. PubMed PMID: 24617126.

261: Barry D, Frew AH, Mohammed H, Desta BF, Tadesse L, Aklilu Y, Biadgo A,

Buffington ST, Sibley LM. The effect of community maternal and newborn health

family meetings on type of birth attendant and completeness of maternal and

newborn care received during birth and the early postnatal period in rural

Ethiopia. J Midwifery Womens Health. 2014 Jan;59 Suppl 1:S44-54. doi:

10.1111/jmwh.12171. PubMed PMID: 24588915.

262: Adane AA, Ayele TA, Ararsa LG, Bitew BD, Zeleke BM. Adverse birth outcomes

among deliveries at Gondar University Hospital, Northwest Ethiopia. BMC Pregnancy

Childbirth. 2014 Feb 27;14:90. doi: 10.1186/1471-2393-14-90. PubMed PMID:

24576205; PubMed Central PMCID: PMC3996071.

263: McClure EM, Nathan RO, Saleem S, Esamai F, Garces A, Chomba E, Tshetu A, Swanson D, Mabeya H, Figuero L, Mirza W, Muyodi D, Franklin H, Lokangaka A, Bidashimwa D, Pasha O, Mwenchanya M, Bose CL, Carlo WA, Hambidge KM, Liechty EA, Krebs N, Wallace DD, Swanson J, Koso-Thomas M, Widmer R, Goldenberg RL. First look: a cluster-randomized trial of ultrasound to improve pregnancy outcomes in low income country settings. *BMC Pregnancy Childbirth*. 2014 Feb 17;14:73. doi: 10.1186/1471-2393-14-73. PubMed PMID: 24533878; PubMed Central PMCID: PMC3996090.

264: Boene H, González R, Valá A, Rupérez M, Velasco C, Machevo S, Saco C, Sevene E, Macete E, Menéndez C, Mungumbe K. Perceptions of malaria in pregnancy and acceptability of preventive interventions among Mozambican pregnant women: implications for effectiveness of malaria control in pregnancy. *PLoS One*. 2014 Feb 3;9(2):e86038. doi: 10.1371/journal.pone.0086038. eCollection 2014. PubMed PMID: 24498268; PubMed Central PMCID: PMC3911904.

265: Taylor MM, Ebrahim S, Abiola N, Kinkodi DK, Mpingulu M, Kabuayi JP, Ekofo F, Newman DR, Peterman TA, Kamb ML, Sidibe K. Correlates of syphilis seropositivity and risk for syphilis-associated adverse pregnancy outcomes among women attending antenatal care clinics in the Democratic Republic of Congo. *Int J STD AIDS*. 2014 Sep;25(10):716-25. doi: 10.1177/0956462413518194. Epub 2014 Jan 22. PubMed PMID: 24452733.

266: Yego F, D'Este C, Byles J, Williams JS, Nyongesa P. Risk factors for maternal mortality in a Tertiary Hospital in Kenya: a case control study. *BMC*



Pregnancy Childbirth. 2014 Jan 22;14:38. doi: 10.1186/1471-2393-14-38. PubMed PMID: 24447854; PubMed Central PMCID: PMC3904405.

267: Osungbade KO, Ayinde OO. Maternal complication prevention: evidence from a case-control study in southwest Nigeria. *Afr J Prim Health Care Fam Med*. 2014 Dec 12;6(1):E1-7. doi: 10.4102/phcfm.v6i1.656. PubMed PMID: 26245427; PubMed Central PMCID: PMC4565040.

268: Debelew GT, Afework MF, Yalew AW. Factors affecting birth preparedness and complication readiness in Jimma Zone, Southwest Ethiopia: a multilevel analysis. *Pan Afr Med J*. 2014 Nov 12;19:272. doi: 10.11604/pamj.2014.19.272.4244. eCollection 2014. PubMed PMID: 25870727; PubMed Central PMCID: PMC4391899.

269: Chama-Chiliba CM, Koch SF. Utilization of focused antenatal care in Zambia: examining individual- and community-level factors using a multilevel analysis. *Health Policy Plan*. 2015 Feb;30(1):78-87. doi: 10.1093/heapol/czt099. Epub 2013 Dec 18. PubMed PMID: 24357197.

270: Prudhomme O'Meara W, Platt A, Naanyu V, Cole D, Ndege S. Spatial autocorrelation in uptake of antenatal care and relationship to individual, household and village-level factors: results from a community-based survey of pregnant women in six districts in western Kenya. *Int J Health Geogr*. 2013 Dec 7;12:55. doi: 10.1186/1476-072X-12-55. PubMed PMID: 24314170; PubMed Central PMCID: PMC4029198.

271: Callaghan-Koru JA, Seifu A, Tholandi M, de Graft-Johnson J, Daniel E, Rawlins B, Worku B, Baqui AH. Newborn care practices at home and in health facilities in 4 regions of Ethiopia. *BMC Pediatr*. 2013 Dec 1;13:198. doi: 10.1186/1471-2431-13-198. PubMed PMID: 24289501; PubMed Central PMCID: PMC4219496.

272: Dixon J, Tenkorang EY, Luginaah IN, Kuire VZ, Boateng GO. National health insurance scheme enrolment and antenatal care among women in Ghana: is there any relationship? *Trop Med Int Health*. 2014 Jan;19(1):98-106. doi: 10.1111/tmi.12223. Epub 2013 Nov 13. PubMed PMID: 24219504.

273: Adewemimo AW, Msuya SE, Olaniyan CT, Adegoke AA. Utilisation of skilled birth attendance in Northern Nigeria: a cross-sectional survey. *Midwifery*. 2014 Jan;30(1):e7-e13. doi: 10.1016/j.midw.2013.09.005. Epub 2013 Sep 25. PubMed PMID: 24139686.

274: Ononokpono DN, Odimegwu CO, Imasiku E, Adedini S. Contextual determinants of maternal health care service utilization in Nigeria. *Women Health*. 2013;53(7):647-68. doi: 10.1080/03630242.2013.826319. PubMed PMID: 24093448.

275: Olusanya BO. Full-term newborns with normal birth weight requiring special care in a resource-constrained setting. *Pan Afr Med J*. 2013 May 29;15:36. doi: 10.11604/pamj.2013.15.36.576. eCollection 2013. PubMed PMID: 24062865; PubMed Central PMCID: PMC3779460.

276: Worku AG, Yalew AW, Afework MF. The contributions of maternity care to reducing adverse pregnancy outcomes: a cohort study in Dabat district, northwest Ethiopia. *Matern Child Health J.* 2014 Aug;18(6):1336-44. doi: 10.1007/s10995-013-1367-x. PubMed PMID: 24045911.

277: Obse N, Mossie A, Gobena T. Magnitude of anemia and associated risk factors among pregnant women attending antenatal care in Shalla Woreda, West Arsi Zone, Oromia Region, Ethiopia. *Ethiop J Health Sci.* 2013 Jul;23(2):165-73. PubMed PMID: 23950633; PubMed Central PMCID: PMC3742894.

278: Bayou NB, Gacho YH. Utilization of clean and safe delivery service package of health services extension program and associated factors in rural kebeles of Kafa Zone, Southwest Ethiopia. *Ethiop J Health Sci.* 2013 Jul;23(2):79-89. PubMed PMID: 23950624; PubMed Central PMCID: PMC3742885.

279: Peters G, Doctor H, Afenyadu G, Findley S, Ager A. Mobile clinic services to serve rural populations in Katsina State, Nigeria: perceptions of services and patterns of utilization. *Health Policy Plan.* 2014 Aug;29(5):642-9. doi: 10.1093/heapol/czt052. Epub 2013 Jul 26. PubMed PMID: 23894072.

280: Birmeta K, Dibaba Y, Woldeyohannes D. Determinants of maternal health care utilization in Holeta town, central Ethiopia. *BMC Health Serv Res.* 2013 Jul 3;13:256. doi: 10.1186/1472-6963-13-256. PubMed PMID: 23822155; PubMed Central

PMCID: PMC3710264.

281: Kwambai TK, Dellicour S, Desai M, Ameh CA, Person B, Achieng F, Mason L, Laserson KF, Ter Kuile FO. Perspectives of men on antenatal and delivery care service utilisation in rural western Kenya: a qualitative study. *BMC Pregnancy Childbirth*. 2013 Jun 21;13:134. doi: 10.1186/1471-2393-13-134. PubMed PMID: 23800139; PubMed Central PMCID: PMC3691751.

282: Yesuf EA, Calderon-Margalit R. Disparities in the use of antenatal care service in Ethiopia over a period of fifteen years. *BMC Pregnancy Childbirth*. 2013 Jun 15;13:131. doi: 10.1186/1471-2393-13-131. PubMed PMID: 23767975; PubMed Central PMCID: PMC3689630.

283: Rai RK, Singh PK, Singh L, Kumar C. Individual characteristics and use of maternal and child health services by adolescent mothers in Niger. *Matern Child Health J*. 2014 Apr;18(3):592-603. doi: 10.1007/s10995-013-1276-z. PubMed PMID: 23737107.

284: Mukasa PK, Kabakyenga J, Senkungu JK, Ngonzi J, Kyalimpa M, Roosmalen VJ. Uterine rupture in a teaching hospital in Mbarara, western Uganda, unmatched case- control study. *Reprod Health*. 2013 May 29;10:29. doi: 10.1186/1742-4755-10-29. PubMed PMID: 23718798; PubMed Central PMCID: PMC3668214.

285: Tsegay Y, Gebrehiwot T, Goicolea I, Edin K, Lemma H, Sebastian MS.

Determinants of antenatal and delivery care utilization in Tigray region, Ethiopia: a cross-sectional study. *Int J Equity Health*. 2013 May 14;12:30. doi: 10.1186/1475-9276-12-30. PubMed PMID: 23672203; PubMed Central PMCID: PMC3658893.

286: Cresswell JA, Yu G, Hatherall B, Morris J, Jamal F, Harden A, Renton A. Predictors of the timing of initiation of antenatal care in an ethnically diverse urban cohort in the UK. *BMC Pregnancy Childbirth*. 2013 May 3;13:103. doi: 10.1186/1471-2393-13-103. PubMed PMID: 23642084; PubMed Central PMCID: PMC3652742.

287: RoCHAT TJ, Tomlinson M, Newell ML, Stein A. Detection of antenatal depression in rural HIV-affected populations with short and ultrashort versions of the Edinburgh Postnatal Depression Scale (EPDS). *Arch Womens Ment Health*. 2013 Oct;16(5):401-10. doi: 10.1007/s00737-013-0353-z. Epub 2013 Apr 25. PubMed PMID: 23615932; PubMed Central PMCID: PMC3778840.

288: Petraro P, Duggan C, Urassa W, Msamanga G, Makubi A, Spiegelman D, Fawzi WW. Determinants of anemia in postpartum HIV-negative women in Dar es Salaam, Tanzania. *Eur J Clin Nutr*. 2013 Jul;67(7):708-17. doi: 10.1038/ejcn.2013.71. Epub 2013 Apr 24. PubMed PMID: 23612515; PubMed Central PMCID: PMC3775569.

289: Worku AG, Yalew AW, Afework MF. Factors affecting utilization of skilled maternal care in Northwest Ethiopia: a multilevel analysis. *BMC Int Health Hum Rights*. 2013 Apr 15;13:20. doi: 10.1186/1472-698X-13-20. PubMed PMID: 23587369; PubMed Central PMCID: PMC3639034.

290: Adeoye IA, Onayade AA, Fatusi AO. Incidence, determinants and perinatal outcomes of near miss maternal morbidity in Ile-Ife Nigeria: a prospective case control study. *BMC Pregnancy Childbirth*. 2013 Apr 15;13:93. doi: 10.1186/1471-2393-13-93. PubMed PMID: 23587107; PubMed Central PMCID: PMC3651395.

291: Atunah-Jay SJ, Pettingell S, Ohene SA, Michael Oakes J, Borowsky IW. The relationship between antenatal provider type and maternal care in rural Ghana: a cross-sectional study. *Trop Med Int Health*. 2013 Jun;18(6):678-86. doi: 10.1111/tmi.12098. Epub 2013 Apr 5. PubMed PMID: 23557101.

292: Ballard K, Gari L, Mosisa H, Wright J. Provision of individualised obstetric risk advice to increase health facility usage by women at risk of a complicated delivery: a cohort study of women in the rural highlands of West Ethiopia. *BJOG*. 2013 Jul;120(8):971-8. doi: 10.1111/1471-0528.12190. Epub 2013 Mar 6. PubMed PMID: 23464619.

293: Kumbani L, Bjune G, Chirwa E, Malata A, Odland JØ. Why some women fail to give birth at health facilities: a qualitative study of women's perceptions of perinatal care from rural Southern Malawi. *Reprod Health*. 2013 Feb 8;10:9. doi: 10.1186/1742-4755-10-9. PubMed PMID: 23394229; PubMed Central PMCID: PMC3585850.

294: Exavery A, Kanté AM, Hingora A, Mbaruku G, Pemba S, Phillips JF. How mistimed and unwanted pregnancies affect timing of antenatal care initiation in

three districts in Tanzania. *BMC Pregnancy Childbirth*. 2013 Feb 6;13:35. doi: 10.1186/1471-2393-13-35. PubMed PMID: 23388110; PubMed Central PMCID: PMC3574825.

295: Doctor HV, Findley SE, Cometto G, Afenyadu GY. Awareness of critical danger signs of pregnancy and delivery, preparations for delivery, and utilization of skilled birth attendants in Nigeria. *J Health Care Poor Underserved*. 2013 Feb;24(1):152-70. doi: 10.1353/hpu.2013.0032. PubMed PMID: 23377725.

296: Pell C, Meñaca A, Were F, Afrah NA, Chatio S, Manda-Taylor L, Hamel MJ, Hodgson A, Tagbor H, Kalilani L, Ouma P, Pool R. Factors affecting antenatal care attendance: results from qualitative studies in Ghana, Kenya and Malawi. *PLoS One*. 2013;8(1):e53747. doi: 10.1371/journal.pone.0053747. Epub 2013 Jan 15. PubMed PMID: 23335973; PubMed Central PMCID: PMC3546008.

297: Tetui M, Ekirapa EK, Bua J, Mutebi A, Tweheyo R, Waiswa P. Quality of Antenatal care services in eastern Uganda: implications for interventions. *Pan Afr Med J*. 2012;13:27. Epub 2012 Oct 9. PubMed PMID: 23308332; PubMed Central PMCID: PMC3527020.

298: Dim CC, Okafor C, Ikeme AC, Anyahie BU. Diabetes mellitus in pregnancy: an update on the current classification and management. *Niger J Med*. 2012 Oct-Dec;21(4):371-6. Review. PubMed PMID: 23304942.

299: Adinma ED. Pattern of clinical presentation of eclampsia at Nnamdi Azikiwe

University Teaching Hospital, Nnewi, Southeastern Nigeria. *Niger J Med*. 2012 Jul-Sep;21(3):313-6. Erratum in: *Niger J Med*. 2012 Oct-Dec;21(4):474. Echendu, D A [corrected to Adinma, E D]. PubMed PMID: 23304927.

300: Do M, Hotchkiss D. Relationships between antenatal and postnatal care and post-partum modern contraceptive use: evidence from population surveys in Kenya and Zambia. *BMC Health Serv Res*. 2013 Jan 4;13:6. doi: 10.1186/1472-6963-13-6. PubMed PMID: 23289547; PubMed Central PMCID: PMC3545900.

301: Kawakatsu Y, Kaneko S, Karama M, Honda S. Prevalence and risk factors of neurological impairment among children aged 6-9 years: from population based cross sectional study in western Kenya. *BMC Pediatr*. 2012 Dec 3;12:186. doi: 10.1186/1471-2431-12-186. PubMed PMID: 23206271; PubMed Central PMCID: PMC3519515.

302: Anyait A, Mukanga D, Oundo GB, Nuwaha F. Predictors for health facility delivery in Busia district of Uganda: a cross sectional study. *BMC Pregnancy Childbirth*. 2012 Nov 20;12:132. doi: 10.1186/1471-2393-12-132. PubMed PMID: 23167791; PubMed Central PMCID: PMC3514288.

303: Sule ST, Baba SL. Utilisation of delivery services in Zaria, northern Nigeria: factors affecting choice of place of delivery. *East Afr J Public Health*. 2012 Jun;9(2):80-4. PubMed PMID: 23139962.



304: Fawole AO, Shah A, Fabanwo AO, Adegbola O, Adewunmi AA, Eniayewun AB, Dara K, El-Ladan AM, Umezulike AC, Alu FE, Adebayo AA, Obaitan FO, Onala OE, Usman Y, Sullayman AO, Kailani S, Sa'id M. Predictors of maternal mortality in institutional deliveries in Nigeria. *Afr Health Sci.* 2012 Mar;12(1):32-40. PubMed PMID: 23066417; PubMed Central PMCID: PMC3462508.

305: Jido TA. Ecalmpsia: maternal and fetal outcome. *Afr Health Sci.* 2012 Jun;12(2):148-52. doi: 10.4314/ahs.v12i2.11. PubMed PMID: 23056020; PubMed Central PMCID: PMC3462530.

306: Hassan MH, Ahmed MR, Shehata SF, Sadek SS. Risk factors of perinatal and neonatal mortality in Alexandria, Egypt. *J Egypt Public Health Assoc.* 2012 Aug;87(3-4):51-6. doi: 10.1097/01.EPX.0000417960.79703.06. PubMed PMID: 22936240.

307: Caley M, Fowler T, Greatrex S, Wood A. Differences in hepatitis B infection rate between ethnic groups in antenatal women in Birmingham, United Kingdom, May 2004 to December 2008. *Euro Surveill.* 2012 Jul 26;17(30). pii: 20228. PubMed PMID: 22856511.

308: Assefa N, Berhane Y, Worku A. Wealth status, mid upper arm circumference (MUAC) and antenatal care (ANC) are determinants for low birth weight in Kersa, Ethiopia. *PLoS One.* 2012;7(6):e39957. doi: 10.1371/journal.pone.0039957. Epub 2012 Jun 29. PubMed PMID: 22792140; PubMed Central PMCID: PMC3386987.

309: Kim MH, Ahmed S, Buck WC, Preidis GA, Hosseinipour MC, Bhalakia A, Nanthuru D, Kazembe PN, Chimbwandira F, Giordano TP, Chiao EY, Schutze GE, Kline MW. The Tingathe programme: a pilot intervention using community health workers to create a continuum of care in the prevention of mother to child transmission of HIV (PMTCT) cascade of services in Malawi. *J Int AIDS Soc*. 2012 Jul 11;15 Suppl 2:17389. doi: 10.7448/IAS.15.4.17389. PubMed PMID: 22789644; PubMed Central PMCID: PMC3499848.

310: Rai RK, Singh PK, Singh L. Utilization of maternal health care services among married adolescent women: insights from the Nigeria Demographic and Health Survey, 2008. *Womens Health Issues*. 2012 Jul-Aug;22(4):e407-14. doi: 10.1016/j.whi.2012.05.001. PubMed PMID: 22749200.

311: Solarin I, Black V. "They told me to come back": women's antenatal care booking experience in inner-city Johannesburg. *Matern Child Health J*. 2013 Feb;17(2):359-67. doi: 10.1007/s10995-012-1019-6. PubMed PMID: 22527767; PubMed Central PMCID: PMC3587683.

312: McDonald AM, Campbell OM. How twins differ: multiple pregnancy and the use of health care in the 2008 Nigeria Demographic and Health Survey. *Trop Med Int Health*. 2012 May;17(5):637-45. doi: 10.1111/j.1365-3156.2012.02967.x. Epub 2012 Apr 2. PubMed PMID: 22469421.

313: Malaju MT, Alene GD. Assessment of utilization of provider-initiated HIV testing and counseling as an intervention for prevention of mother to child

transmission of HIV and associated factors among pregnant women in Gondar town, North West Ethiopia. BMC Public Health. 2012 May 11;12:226. doi: 10.1186/1471-2458-12-226. PubMed PMID: 22440018; PubMed Central PMCID: PMC3350437.

314: Stephenson R, Elfstrom KM. Community influences on antenatal and delivery care in Bangladesh, Egypt, and Rwanda. Public Health Rep. 2012 Jan-Feb;127(1):96-106. PubMed PMID: 22298928; PubMed Central PMCID: PMC3234403.

315: Regassa N. Antenatal and postnatal care service utilization in southern Ethiopia: a population-based study. Afr Health Sci. 2011 Sep;11(3):390-7. PubMed PMID: 22275929; PubMed Central PMCID: PMC3260999.

316: Kinuthia J, Kiarie JN, Farquhar C, Richardson BA, Nduati R, Mbori-Ngacha D, John-Stewart G. Uptake of prevention of mother to child transmission interventions in Kenya: health systems are more influential than stigma. J Int AIDS Soc. 2011 Dec 28;14:61. doi: 10.1186/1758-2652-14-61. PubMed PMID: 22204313; PubMed Central PMCID: PMC3313883.

317: Kiondo P, Wamuyu-Maina G, Bimenya GS, Tumwesigye NM, Wandabwa J, Okong P. Risk factors for pre-eclampsia in Mulago Hospital, Kampala, Uganda. Trop Med Int Health. 2012 Apr;17(4):480-7. doi: 10.1111/j.1365-3156.2011.02926.x. Epub 2011 Dec 13. PubMed PMID: 22151898.

318: Gebremedhin S, Enquselassie F, Umeta M. Prevalence of prenatal zinc deficiency and its association with socio-demographic, dietary and health care related factors in rural Sidama, Southern Ethiopia: a cross-sectional study. *BMC Public Health*. 2011 Nov 29;11:898. doi: 10.1186/1471-2458-11-898. PubMed PMID: 22126192; PubMed Central PMCID: PMC3239408.

319: Ola B, Crabb J, Tayo A, Gleadow Ware SH, Dhar A, Krishnadas R. Factors associated with antenatal mental disorder in West Africa: a cross-sectional survey. *BMC Pregnancy Childbirth*. 2011 Nov 4;11:90. doi: 10.1186/1471-2393-11-90. PubMed PMID: 22054304; PubMed Central PMCID: PMC3231953.

320: Jeremiah I, Kalio GB, Oriji VK. Domestic violence in pregnancy among antenatal attendees at the University of Port Harcourt Teaching Hospital, Port Harcourt. *Niger J Med*. 2011 Jul-Sep;20(3):355-9. PubMed PMID: 21970218.

321: Magoma M, Requejo J, Merialdi M, Campbell OM, Cousens S, Filippi V. How much time is available for antenatal care consultations? Assessment of the quality of care in rural Tanzania. *BMC Pregnancy Childbirth*. 2011 Sep 24;11:64. doi: 10.1186/1471-2393-11-64. PubMed PMID: 21943347; PubMed Central PMCID: PMC3195209.

322: Hailu M, Gebremariam A, Alemseged F, Deribe K. Birth preparedness and complication readiness among pregnant women in Southern Ethiopia. *PLoS One*. 2011;6(6):e21432. doi: 10.1371/journal.pone.0021432. Epub 2011 Jun 22. PubMed PMID: 21731747; PubMed Central PMCID: PMC3120869.

323: Gross K, Armstrong Schellenberg J, Kessy F, Pfeiffer C, Obrist B. Antenatal care in practice: an exploratory study in antenatal care clinics in the Kilombero Valley, south-eastern Tanzania. *BMC Pregnancy Childbirth*. 2011 May 20;11:36. doi: 10.1186/1471-2393-11-36. PubMed PMID: 21599900; PubMed Central PMCID: PMC3123249.

324: Okeudo C, B U E, Ojiyi EC. Maternal HIV positive sero-prevalence at delivery at a tertiary hospital in South-Eastern Nigeria. *Niger J Med*. 2010 Oct-Dec;19(4):471-4. PubMed PMID: 21526642.

325: Ekure EN, Ezeaka VC, Iroha E, Egri-Okwaji M. Prospective audit of perinatal mortality among inborn babies in a tertiary health center in Lagos, Nigeria. *Niger J Clin Pract*. 2011 Jan-Mar;14(1):88-94. doi: 10.4103/1119-3077.79271. PubMed PMID: 21494000.

326: Omole-Ohonsi A, Ashimi AO. Grand multiparity: obstetric performance in Aminu Kano Teaching Hospital, Kano, Nigeria. *Niger J Clin Pract*. 2011 Jan-Mar;14(1):6-9. doi: 10.4103/1119-3077.79231. PubMed PMID: 21493983.

327: Ochako R, Fotso JC, Ikamari L, Khasakhala A. Utilization of maternal health services among young women in Kenya: insights from the Kenya Demographic and Health Survey, 2003. *BMC Pregnancy Childbirth*. 2011 Jan 10;11:1. doi: 10.1186/1471-2393-11-1. PubMed PMID: 21214960; PubMed Central PMCID: PMC3022772.

328: Kurth F, B  lard S, Mombo-Ngoma G, Schuster K, Adegnikaa AA, Bouyou-Akotet MK, Kremsner PG, Ramharter M. Adolescence as risk factor for adverse pregnancy outcome in Central Africa--a cross-sectional study. *PLoS One*. 2010 Dec 20;5(12):e14367. doi: 10.1371/journal.pone.0014367. PubMed PMID: 21188301; PubMed Central PMCID: PMC3004789.

329: Ali AA, Osman MM, Abbaker AO, Adam I. Use of antenatal care services in Kassala, eastern Sudan. *BMC Pregnancy Childbirth*. 2010 Oct 25;10:67. doi: 10.1186/1471-2393-10-67. PubMed PMID: 20973972; PubMed Central PMCID: PMC2987884.

330: Oladokun A, Oladokun RE, Morhason-Bello I, Bello AF, Adedokun B. Proximate predictors of early antenatal registration among Nigerian pregnant women. *Ann Afr Med*. 2010 Oct-Dec;9(4):222-5. doi: 10.4103/1596-3519.70959. PubMed PMID: 20935421.

331: Faye A, Faye M, B   IO, Ndiaye P, Tal-Dia A. [Factors determining the place of delivery in women who attended at least one antenatal consultation in a health facility (Senegal)]. *Rev Epidemiol Sante Publique*. 2010 Oct;58(5):323-9. doi: 10.1016/j.respe.2010.05.004. Epub 2010 Sep 28. French. PubMed PMID: 20880645.

332: Tweheyo R, Konde-Lule J, Tumwesigye NM, Sekandi JN. Male partner attendance of skilled antenatal care in peri-urban Gulu district, Northern Uganda. *BMC Pregnancy Childbirth*. 2010 Sep 16;10:53. doi: 10.1186/1471-2393-10-53. PubMed PMID: 20846369; PubMed Central PMCID: PMC2946269.

333: Bancheno WM, Mwanyumba F, Mareverwa J. Outcomes and challenges of scaling up comprehensive PMTCT services in rural Swaziland, Southern Africa. *AIDS Care*. 2010 Sep;22(9):1130-5. doi: 10.1080/09540121003615079. PubMed PMID: 20824565.

334: Omo-Aghoja VW, Omo-Aghoja LO, Ugboko VI, Obuekwe ON, Saheeb BD, Feyi-Waboso P, Onowhakpor A. Antenatal determinants of oro-facial clefts in Southern Nigeria. *Afr Health Sci*. 2010 Mar;10(1):31-9. PubMed PMID: 20811522; PubMed Central PMCID: PMC2895797.

335: Sanghvi TG, Harvey PW, Wainwright E. Maternal iron-folic acid supplementation programs: evidence of impact and implementation. *Food Nutr Bull*. 2010 Jun;31(2 Suppl):S100-7. Review. PubMed PMID: 20715594.

336: Iyaniwura CA, Yussuf Q. Utilization of antenatal care and delivery services in Sagamu, south western Nigeria. *Afr J Reprod Health*. 2009 Sep;13(3):111-22. PubMed PMID: 20690266.

337: Harrison KA. The struggle to reduce high maternal mortality in Nigeria. *Afr J Reprod Health*. 2009 Sep;13(3):9-20. PubMed PMID: 20690258.

338: Utoo BT, Mutahir TJ, Utoo PM. Knowledge, attitude and practice of family planning methods among women attending antenatal clinic in Jos, North-central Nigeria. *Niger J Med*. 2010 Apr-Jun;19(2):214-8. PubMed PMID: 20642092.

339: Titaley CR, Dibley MJ, Roberts CL, Agho K. Combined iron/folic acid supplements and malaria prophylaxis reduce neonatal mortality in 19 sub-Saharan African countries. *Am J Clin Nutr*. 2010 Jul;92(1):235-43. doi: 10.3945/ajcn.2009.29093. Epub 2010 May 26. PubMed PMID: 20504976.

340: Okogbenin SA, Eigbefoh JO, Omorogbe F, Okogbo F, Okonta PI, Ohihoin AG. Eclampsia in Irrua Specialist Teaching Hospital: a five-year review. *Niger J Clin Pract*. 2010 Jun;13(2):149-53. PubMed PMID: 20499746.

341: Chigbu B, Onwere S, Kamanu CI, Aluka C, Okoro O, Adibe E. Pregnancy outcome in booked and unbooked mothers in South Eastern Nigeria. *East Afr Med J*. 2009 Jun;86(6):267-71. PubMed PMID: 20358788.

342: Onayade AA, Akanbi OO, Okunola HA, Oyeniya CF, Togun OO, Sule SS. Birth preparedness and emergency readiness plans of antenatal clinic attendees in Ile-ife, Nigeria. *Niger Postgrad Med J*. 2010 Mar;17(1):30-9. PubMed PMID: 20348980.

343: Umeora OU, Egwuatu VE. Obstetric performance recall accuracy (OPERA) among a low literacy population in Southeast Nigeria. *Niger J Clin Pract*. 2009 Dec;12(4):362-6. PubMed PMID: 20329672.



344: Magoma M, Requejo J, Campbell OM, Cousens S, Filippi V. High ANC coverage and low skilled attendance in a rural Tanzanian district: a case for implementing a birth plan intervention. *BMC Pregnancy Childbirth*. 2010 Mar 19;10:13. doi: 10.1186/1471-2393-10-13. PubMed PMID: 20302625; PubMed Central PMCID: PMC2850322.

345: El Mhamdi S, Soltani MS, Haddad A, Letaief M, Ben Salem K. [New criteria and quality of health care services in the governorate of Monastir, Tunisia]. *East Mediterr Health J*. 2010 Jan;16(1):107-12. French. PubMed PMID: 20214167.

346: Nikiema L, Kameli Y, Capon G, Sondo B, Martin-Prével Y. Quality of antenatal care and obstetrical coverage in rural Burkina Faso. *J Health Popul Nutr*. 2010 Feb;28(1):67-75. PubMed PMID: 20214088; PubMed Central PMCID: PMC2975848.

347: Kadowa I. Ruptured uterus in rural Uganda: prevalence, predisposing factors and outcomes. *Singapore Med J*. 2010 Jan;51(1):35-8. PubMed PMID: 20200773.

348: Mubyazi GM, Bloch P, Magnussen P, Olsen ØE, Byskov J, Hansen KS, Bygbjerg IC. Women's experiences and views about costs of seeking malaria chemoprevention and other antenatal services: a qualitative study from two districts in rural Tanzania. *Malar J*. 2010 Feb 17;9:54. doi: 10.1186/1475-2875-9-54. PubMed PMID: 20163707; PubMed Central PMCID: PMC2837674.

349: Ndirangu J, Newell ML, Tanser F, Herbst AJ, Bland R. Decline in early life mortality in a high HIV prevalence rural area of South Africa: evidence of HIV

prevention or treatment impact? AIDS. 2010 Feb 20;24(4):593-602. doi: 10.1097/QAD.0b013e328335cff5. PubMed PMID: 20071975; PubMed Central PMCID: PMC4239477.

350: Ukachukwu VE, Unger H, Onoka C, Nduka C, Maina S, Ngugi N. Maternal morbidity and mortality in peri-urban Kenya--assessing progress in improving maternal healthcare. East Afr J Public Health. 2009 Aug;6(2):112-8. PubMed PMID: 20000013.

351: Makoka D. Towards an understanding of regional disparities in social inequities in maternal health in Malawi. Afr Health Sci. 2009 Dec;9(4):234-41. PubMed PMID: 21503174; PubMed Central PMCID: PMC3074387.

352: Choté AA, de Groot CJ, Bruijnzeels MA, Redekop K, Jaddoe VW, Hofman A, Steegers EA, Mackenbach JP, Foets M. Ethnic differences in antenatal care use in a large multi-ethnic urban population in the Netherlands. Midwifery. 2011 Feb;27(1):36-41. doi: 10.1016/j.midw.2009.07.008. Epub 2009 Nov 25. PubMed PMID: 19939527.

353: Olusanya BO, Solanke OA. Predictors of term stillbirths in an inner-city maternity hospital in Lagos, Nigeria. Acta Obstet Gynecol Scand. 2009;88(11):1243-51. doi: 10.3109/00016340903287474. PubMed PMID: 19900141.

354: Olusanya BO, Ofovwe GE. Predictors of preterm births and low birthweight in

an inner-city hospital in sub-Saharan Africa. *Matern Child Health J*. 2010 Nov;14(6):978-86. doi: 10.1007/s10995-009-0528-4. Erratum in: *Matern Child Health J*. 2010 Nov;14(6):987. PubMed PMID: 19795198.

355: Lawn JE, Kerber K, Enweronu-Laryea C, Masee Bateman O. Newborn survival in low resource settings--are we delivering? *BJOG*. 2009 Oct;116 Suppl 1:49-59. doi: 10.1111/j.1471-0528.2009.02328.x. Review. PubMed PMID: 19740173.

356: Olusanya BO, Solanke OA. Maternal and neonatal factors associated with mode of delivery under a universal newborn hearing screening programme in Lagos, Nigeria. *BMC Pregnancy Childbirth*. 2009 Sep 4;9:41. doi: 10.1186/1471-2393-9-41. PubMed PMID: 19732443; PubMed Central PMCID: PMC2749799.

357: Landis SH, Ananth CV, Lokomba V, Hartmann KE, Thorp JM Jr, Horton A, Atibu J, Ryder RW, Tshetu A, Meshnick SR. Ultrasound-derived fetal size nomogram for a sub-Saharan African population: a longitudinal study. *Ultrasound Obstet Gynecol*. 2009 Oct;34(4):379-86. doi: 10.1002/uog.6357. PubMed PMID: 19402076.

358: Babalola S, Lawan U. Factors predicting BCG immunization status in northern Nigeria: a behavioral-ecological perspective. *J Child Health Care*. 2009 Mar;13(1):46-62. doi: 10.1177/1367493508098380. PubMed PMID: 19240190.

359: Pettifor A, Taylor E, Nku D, Duvall S, Tabala M, Meshnick S, Behets F. Bed net ownership, use and perceptions among women seeking antenatal care in

Kinshasa, Democratic Republic of the Congo (DRC): opportunities for improved maternal and child health. *BMC Public Health*. 2008 Sep 24;8:331. doi: 10.1186/1471-2458-8-331. PubMed PMID: 18816373; PubMed Central PMCID: PMC2571099.

360: Ibeh CC. Is poor maternal mortality index in Nigeria a problem of care utilization? A case study of Anambra State. *Afr J Reprod Health*. 2008 Aug;12(2):132-40. PubMed PMID: 20695048.

361: Oladapo OT, Osiberu MO. Do sociodemographic characteristics of pregnant women determine their perception of antenatal care quality? *Matern Child Health J*. 2009 Jul;13(4):505-11. doi: 10.1007/s10995-008-0389-2. Epub 2008 Jul 16. PubMed PMID: 18629621.

362: Maputle MS, Jali MN. Pregnant women's knowledge about mother-to-child transmission (MTCT) of HIV infection through breast feeding. *Curationis*. 2008 Mar;31(1):45-51. PubMed PMID: 18592948.

363: Ramchandani PG, Richter LM, Stein A, Norris SA. Predictors of postnatal depression in an urban South African cohort. *J Affect Disord*. 2009 Mar;113(3):279-84. doi: 10.1016/j.jad.2008.05.007. Epub 2008 Jun 20. PubMed PMID: 18571734.

364: Ekanem EI, Etuk SJ, Ekott MI, Ekabua JE, Iklaki C. Socio demographic profile and presentations of patients with ruptured gravid uterus in Calabar Nigeria.

Niger J Med. 2008 Jan-Mar;17(1):78-82. PubMed PMID: 18390140.

365: Anya SE, Hydera A, Jaiteh LE. Antenatal care in The Gambia: missed opportunity for information, education and communication. BMC Pregnancy Childbirth. 2008 Mar 7;8:9. doi: 10.1186/1471-2393-8-9. PubMed PMID: 18325122; PubMed Central PMCID: PMC2322944.

366: Evjen-Olsen B, Hinderaker SG, Lie RT, Bergsjø P, Gasheka P, Kvåle G. Risk factors for maternal death in the highlands of rural northern Tanzania: a case-control study. BMC Public Health. 2008 Feb 8;8:52. doi: 10.1186/1471-2458-8-52. PubMed PMID: 18257937; PubMed Central PMCID: PMC2259340.

**SEARCH STRATEGY FOR OVID MEDLINE(R). LAST SEARCHED= 23/04/19****SEARCH RESULTS= 1568**

| # Searches                                                                                                                                                             | Results |
|------------------------------------------------------------------------------------------------------------------------------------------------------------------------|---------|
| 1 determinant*.mp. or "Social Determinants of Health"/                                                                                                                 | 202245  |
| 2 factor*.mp.                                                                                                                                                          | 4926645 |
| 3 predict*.mp.                                                                                                                                                         | 1287587 |
| 4 Prenatal Care/ or antenatal.mp. or Pregnancy/                                                                                                                        | 854680  |
| 5 ante natal.mp.                                                                                                                                                       | 421     |
| 6 ante-natal.mp.                                                                                                                                                       | 421     |
| 7 maternal health.mp. or Maternal Health Services/ or Maternal Health/ or Pregnancy/                                                                                   | 853071  |
| 8 or/1-3                                                                                                                                                               | 5831393 |
| 9 or/4-7                                                                                                                                                               | 859617  |
| 10 "Equipment and Supplies Utilization"/ or Drug Utilization/ or "Procedures and Techniques Utilization"/ or "Facilities and Services Utilization"/ or utilization.mp. | 171310  |
| 11 utilisation.mp.                                                                                                                                                     | 17533   |
| 12 usage.mp.                                                                                                                                                           | 73333   |
| 13 access.mp.                                                                                                                                                          | 239255  |
| 14 or/10-13                                                                                                                                                            | 483498  |

|    |                                                                                                                                                                                                                                                                                                                                                                                                                                                                                                                                                                                                                                |         |
|----|--------------------------------------------------------------------------------------------------------------------------------------------------------------------------------------------------------------------------------------------------------------------------------------------------------------------------------------------------------------------------------------------------------------------------------------------------------------------------------------------------------------------------------------------------------------------------------------------------------------------------------|---------|
|    | "africa south of the sahara"/ or africa, central/ or cameroon/ or central african republic/ or chad/ or congo/ or "democratic republic of the congo"/ or equatorial guinea/ or gabon/ or "sao tome and principe"/ or africa, eastern/ or burundi/ or djibouti/ or eritrea/ or ethiopia/ or kenya/ or rwanda/ or somalia/ or south sudan/ or sudan/ or tanzania/ or                                                                                                                                                                                                                                                             |         |
| 15 | uganda/ or africa, southern/ or angola/ or botswana/ or lesotho/ or malawi/ or mozambique/ or namibia/ or south africa/ or swaziland/ or zambia/ or zimbabwe/ or africa, western/ or benin/ or burkina faso/ or cabo verde/ or cote d'ivoire/ or gambia/ or ghana/ or guinea/ or guinea-bissau/ or liberia/ or mali/ or mauritania/ or niger/ or nigeria/ or senegal/ or sierra leone/ or togo/                                                                                                                                                                                                                                | 195777  |
| 16 | 8 and 9 and 14 and 15                                                                                                                                                                                                                                                                                                                                                                                                                                                                                                                                                                                                          | 1568    |
| 17 | determinant*.mp. or "Social Determinants of Health"/                                                                                                                                                                                                                                                                                                                                                                                                                                                                                                                                                                           | 202245  |
| 18 | factor*.mp.                                                                                                                                                                                                                                                                                                                                                                                                                                                                                                                                                                                                                    | 4926645 |
| 19 | predict*.mp.                                                                                                                                                                                                                                                                                                                                                                                                                                                                                                                                                                                                                   | 1287587 |
| 20 | Prenatal Care/ or antenatal.mp. or Pregnancy/                                                                                                                                                                                                                                                                                                                                                                                                                                                                                                                                                                                  | 854680  |
| 21 | ante natal.mp.                                                                                                                                                                                                                                                                                                                                                                                                                                                                                                                                                                                                                 | 421     |
| 22 | ante-natal.mp.                                                                                                                                                                                                                                                                                                                                                                                                                                                                                                                                                                                                                 | 421     |
| 23 | maternal health.mp. or Maternal Health Services/ or Maternal Health/ or Pregnancy/                                                                                                                                                                                                                                                                                                                                                                                                                                                                                                                                             | 853071  |
| 24 | or/17-19                                                                                                                                                                                                                                                                                                                                                                                                                                                                                                                                                                                                                       | 5831393 |
| 25 | or/20-23                                                                                                                                                                                                                                                                                                                                                                                                                                                                                                                                                                                                                       | 859617  |
| 26 | "Equipment and Supplies Utilization"/ or Drug Utilization/ or "Procedures and Techniques Utilization"/ or "Facilities and Services Utilization"/ or utilization.mp.                                                                                                                                                                                                                                                                                                                                                                                                                                                            | 171310  |
| 27 | utilisation.mp.                                                                                                                                                                                                                                                                                                                                                                                                                                                                                                                                                                                                                | 17533   |
| 28 | usage.mp.                                                                                                                                                                                                                                                                                                                                                                                                                                                                                                                                                                                                                      | 73333   |
| 29 | access.mp.                                                                                                                                                                                                                                                                                                                                                                                                                                                                                                                                                                                                                     | 239255  |
| 30 | or/26-29                                                                                                                                                                                                                                                                                                                                                                                                                                                                                                                                                                                                                       | 483498  |
| 31 | "africa south of the sahara"/ or africa, central/ or cameroon/ or central african republic/ or chad/ or congo/ or "democratic republic of the congo"/ or equatorial guinea/ or gabon/ or "sao tome and principe"/ or africa, eastern/ or burundi/ or djibouti/ or eritrea/ or ethiopia/ or kenya/ or rwanda/ or somalia/ or south sudan/ or sudan/ or tanzania/ or uganda/ or africa, southern/ or angola/ or botswana/ or lesotho/ or malawi/ or mozambique/ or namibia/ or south africa/ or swaziland/ or zambia/ or zimbabwe/ or africa, western/ or benin/ or burkina faso/ or cabo verde/ or cote d'ivoire/ or gambia/ or | 195777  |

ghana/ or guinea/ or guinea-bissau/ or liberia/ or mali/ or mauritania/ or niger/ or nigeria/  
or senegal/ or sierra leone/ or togo/

32 24 and 25 and 30 and 31

1568

## References

1152. Ndiaye P, Amoul Kini G, Abdoulaye I, Diagne Camara M, Tal-Dia A. [Epidemiology of women suffering from obstetric fistula in Niger]. [in French] *Med Trop (Mars)* [Internet]. 2009 [cited 2009 Feb];69(1):61-5. In: Ovid MEDLINE(R) [Internet].  
<http://ovidsp.ovid.com/ovidweb.cgi?T=JS&PAGE=reference&D=med6&NEWS=N&AN=19499737>
1153. Price JE, Leslie JA, Welsh M, Binagwaho A. Integrating HIV clinical services into primary health care in Rwanda: a measure of quantitative effects. *AIDS Care* [Internet]. 2009 [cited 2009 May];21(5):608-14. In: Ovid MEDLINE(R) [Internet].  
<http://ovidsp.ovid.com/ovidweb.cgi?T=JS&PAGE=reference&D=med6&NEWS=N&AN=19444669>
1154. Patel CJ, Kooverjee T. Abortion and contraception: attitudes of South african university students. *Health Care Women Int* [Internet]. 2009 [cited 2009 Jun];30(6):550-68. In: Ovid MEDLINE(R) [Internet].  
<http://ovidsp.ovid.com/ovidweb.cgi?T=JS&PAGE=reference&D=med6&NEWS=N&AN=19418325>
1155. Landis SH, Ananth CV, Lokomba V, Hartmann KE, Thorp JM Jr, Horton A, Atibu J, Ryder RW, Tshetu A, Meshnick SR. Ultrasound-derived fetal size nomogram for a sub-Saharan African population: a longitudinal study. *Ultrasound Obstet Gynecol* [Internet]. 2009 [cited 2009 Oct];34(4):379-86. In: Ovid MEDLINE(R) [Internet].  
<http://ovidsp.ovid.com/ovidweb.cgi?T=JS&PAGE=reference&D=med6&NEWS=N&AN=19402076>
1156. MacPhail C, Pettifor A, Moyo W, Rees H. Factors associated with HIV testing among sexually active South African youth aged 15-24 years. *AIDS Care* [Internet]. 2009 [cited 2009 Apr];21(4):456-67. In: Ovid MEDLINE(R) [Internet].  
<http://ovidsp.ovid.com/ovidweb.cgi?T=JS&PAGE=reference&D=med6&NEWS=N&AN=19401866>
1157. Nikiema B, Beninguisse G, Haggerty JL. Providing information on pregnancy complications during antenatal visits: unmet educational needs in sub-Saharan Africa. *Health Policy Plan* [Internet]. 2009 [cited 2009 Sep];24(5):367-76. In: Ovid MEDLINE(R) [Internet].  
<http://ovidsp.ovid.com/ovidweb.cgi?T=JS&PAGE=reference&D=med6&NEWS=N&AN=19401360>
1158. Omole-Ohonsi A, Ashimi OA. Non-emergency hysterectomy: why the aversion?. *Arch Gynecol Obstet* [Internet]. 2009 [cited 2009 Dec];280(6):953-9. In: Ovid MEDLINE(R) [Internet].  
<http://ovidsp.ovid.com/ovidweb.cgi?T=JS&PAGE=reference&D=med6&NEWS=N&AN=19319553>
1159. Laher F, Todd CS, Stibich MA, Phofa R, Behane X, Mohapi L, Gray G. A qualitative assessment of decisions affecting contraceptive utilization and fertility intentions among HIV-positive women



- in Soweto, South Africa. *AIDS BEHAV* [Internet]. 2009 [cited 2009 Jun];13 Suppl 147-54. In: Ovid MEDLINE(R) [Internet].  
<http://ovidsp.ovid.com/ovidweb.cgi?T=JS&PAGE=reference&D=med6&NEWS=N&AN=19308719>
- MacCarthy S, Laher F, Nduna M, Farlane L, Kaida A. Responding to her question: a review of the influence of pregnancy on HIV disease progression in the context of expanded access to HAART in sub-Saharan Africa. *AIDS BEHAV* [Internet]. 2009 [cited 2009 Jun];13 Suppl 166-71. In: Ovid MEDLINE(R) [Internet].  
<http://ovidsp.ovid.com/ovidweb.cgi?T=JS&PAGE=reference&D=med6&NEWS=N&AN=19301115>
- Mrisho M, Obrist B, Schellenberg JA, Haws RA, Mushi AK, Mshinda H, Tanner M, Schellenberg D. The use of antenatal and postnatal care: perspectives and experiences of women and health care providers in rural southern Tanzania. *BMC Pregnancy Childbirth* [Internet]. 2009 [cited 2009 Mar 04];910. In: Ovid MEDLINE(R) [Internet].  
<http://ovidsp.ovid.com/ovidweb.cgi?T=JS&PAGE=reference&D=med6&NEWS=N&AN=19261181>
- Eisele TP, Keating J, Littrell M, Larsen D, Macintyre K. Assessment of insecticide-treated bednet use among children and pregnant women across 15 countries using standardized national surveys. *Am J Trop Med Hyg* [Internet]. 2009 [cited 2009 Feb];80(2):209-14. In: Ovid MEDLINE(R) [Internet].  
<http://ovidsp.ovid.com/ovidweb.cgi?T=JS&PAGE=reference&D=med6&NEWS=N&AN=19190215>
- Cham M, Sundby J, Vangen S. Fetal outcome in severe maternal morbidity: too many stillbirths. *Acta Obstet Gynecol Scand* [Internet]. 2009 [cited 2009];88(3):343-9. In: Ovid MEDLINE(R) [Internet].  
<http://ovidsp.ovid.com/ovidweb.cgi?T=JS&PAGE=reference&D=med6&NEWS=N&AN=19172420>
- Accorsi S, Kedir N, Farese P, Dhaba S, Racalbutto V, Seifu A, Manenti F. Poverty, inequality and health: the challenge of the double burden of disease in a non-profit hospital in rural Ethiopia. *Trans R Soc Trop Med Hyg* [Internet]. 2009 [cited 2009 May];103(5):461-8. In: Ovid MEDLINE(R) [Internet].  
<http://ovidsp.ovid.com/ovidweb.cgi?T=JS&PAGE=reference&D=med6&NEWS=N&AN=19157475>
- Pettifor A, Taylor E, Nku D, Duvall S, Tabala M, Mwandagalirwa K, Meshnick S, Behets F. Free distribution of insecticide treated bed nets to pregnant women in Kinshasa: an effective way to achieve 80% use by women and their newborns. *Trop Med Int Health* [Internet]. 2009 [cited 2009 Jan];14(1):20-8. In: Ovid MEDLINE(R) [Internet].  
<http://ovidsp.ovid.com/ovidweb.cgi?T=JS&PAGE=reference&D=med6&NEWS=N&AN=19121147>
- Atuyambe L, Mirembe F, Annika J, Kirumira EK, Faxelid E. Seeking safety and empathy: adolescent health seeking behavior during pregnancy and early motherhood in central Uganda. *J Adolesc* [Internet]. 2009 [cited 2009 Aug];32(4):781-96. In: Ovid MEDLINE(R) [Internet].  
<http://ovidsp.ovid.com/ovidweb.cgi?T=JS&PAGE=reference&D=med6&NEWS=N&AN=19054551>

- Mbaye M, Moreira PM, Gueye SM, Cisse CT, Moreau JC, Kane A, Diao M. [Pregnancies associated with valvular prosthesis at Dakar Teaching Hospital: prognosis, epidemiological, clinical and therapeutical aspects]. [in French] *J Gynecol Obstet Biol Reprod (Paris)* [Internet]. 2009 [cited 2009 Feb];38(1):83-8. In: Ovid MEDLINE(R) [Internet]. <http://ovidsp.ovid.com/ovidweb.cgi?T=JS&PAGE=reference&D=med6&NEWS=N&AN=18976869>
1167. Amoako Johnson F, Madise NJ. Examining the geographical heterogeneity associated with risk of mistimed and unwanted pregnancy in Ghana. *J Biosoc Sci* [Internet]. 2009 [cited 2009 Mar];41(2):249-67. In: Ovid MEDLINE(R) [Internet]. <http://ovidsp.ovid.com/ovidweb.cgi?T=JS&PAGE=reference&D=med6&NEWS=N&AN=18976547>
1168. Johnson FA, Padmadas SS, Brown JJ. On the spatial inequalities of institutional versus home births in Ghana: a multilevel analysis. *J Community Health* [Internet]. 2009 [cited 2009 Feb];34(1):64-72. In: Ovid MEDLINE(R) [Internet]. <http://ovidsp.ovid.com/ovidweb.cgi?T=JS&PAGE=reference&D=med6&NEWS=N&AN=18830808>
1169. Oladapo OT, Osiberu MO. Do sociodemographic characteristics of pregnant women determine their perception of antenatal care quality?. *Matern Child Health J* [Internet]. 2009 [cited 2009 Jul];13(4):505-11. In: Ovid MEDLINE(R) [Internet]. <http://ovidsp.ovid.com/ovidweb.cgi?T=JS&PAGE=reference&D=med6&NEWS=N&AN=18629621>
1170. Fotso JC, Ezech A, Madise N, Ziraba A, Ogollah R. What does access to maternal care mean among the urban poor? Factors associated with use of appropriate maternal health services in the slum settlements of Nairobi, Kenya. *Matern Child Health J* [Internet]. 2009 [cited 2009 Jan];13(1):130-7. In: Ovid MEDLINE(R) [Internet]. <http://ovidsp.ovid.com/ovidweb.cgi?T=JS&PAGE=reference&D=med6&NEWS=N&AN=18297380>
1171. Ojengbede OA, Okonkwo SN, Morhason-Bello IO. Comparative evaluation of haemoglobin estimation amongst pregnant women in Ibadan: Hemocue - B haemoglobin analyzer versus haemiglobincyanide (standard) method as the gold standard. *Afr J Reprod Health* [Internet]. 2008 [cited 2008 Aug];12(2):153-9. In: Ovid MEDLINE(R) [Internet]. <http://ovidsp.ovid.com/ovidweb.cgi?T=JS&PAGE=reference&D=med6&NEWS=N&AN=20695050>
1172. Ibeh CC. Is poor maternal mortality index in Nigeria a problem of care utilization? A case study of Anambra State. *Afr J Reprod Health* [Internet]. 2008 [cited 2008 Aug];12(2):132-40. In: Ovid MEDLINE(R) [Internet]. <http://ovidsp.ovid.com/ovidweb.cgi?T=JS&PAGE=reference&D=med6&NEWS=N&AN=20695048>
1173. Pembe AB, Urassa DP, Darj E, Carlsted A, Olsson P. Qualitative study on maternal referrals in rural Tanzania: decision making and acceptance of referral advice. *Afr J Reprod Health* [Internet]. 2008 [cited 2008 Aug];12(2):120-31. In: Ovid MEDLINE(R) [Internet]. <http://ovidsp.ovid.com/ovidweb.cgi?T=JS&PAGE=reference&D=med6&NEWS=N&AN=20695047>
1174. Abe E, Omo-Aghoja LO. Maternal mortality at the Central Hospital, Benin City Nigeria: a ten year review. *Afr J Reprod Health* [Internet]. 2008 [cited 2008 Dec];12(3):17-26. In: Ovid MEDLINE(R)
- 1175.

- [Internet].  
<http://ovidsp.ovid.com/ovidweb.cgi?T=JS&PAGE=reference&D=med6&NEWS=N&AN=19435010>
1176. Nwagha UI, Ugwu OV, Nwagha TU, Anyaehie US. The influence of parity on the gestational age at booking among pregnant women in Enugu, South East Nigeria. *NIGER. J. PHYSIOL. SCI.* [Internet]. 2008 [cited 2008 Jun-Dec];23(1-2):67-70. In: Ovid MEDLINE(R) [Internet].  
<http://ovidsp.ovid.com/ovidweb.cgi?T=JS&PAGE=reference&D=med6&NEWS=N&AN=19434217>
1177. Adegbola O, Ogedengbe OK. The acceptance rate of intrauterine contraceptive device (IUCD) amongst family planning clinic users in Lagos University Teaching Hospital (LUTH). *Niger. q. j. hosp. med.* [Internet]. 2008 [cited 2008 Oct-Dec];18(4):175-80. In: Ovid MEDLINE(R) [Internet].  
<http://ovidsp.ovid.com/ovidweb.cgi?T=JS&PAGE=reference&D=med6&NEWS=N&AN=19391314>
1178. Wirth M, Sacks E, Delamonica E, Storeygard- A, Minujin A, Balk D. "Delivering" on the MDGs?: equity and maternal health in Ghana, Ethiopia and Kenya. *East Afr J Public Health* [Internet]. 2008 [cited 2008 Dec];5(3):133-41. In: Ovid MEDLINE(R) [Internet].  
<http://ovidsp.ovid.com/ovidweb.cgi?T=JS&PAGE=reference&D=med6&NEWS=N&AN=19374312>
1179. Faye SL. [Becoming a mother in Senegal: the experience of motherhood in a setting of social injustice and health service failures]. [in French] *Sante* [Internet]. 2008 [cited 2008 Jul-Sep];18(3):175-83. In: Ovid MEDLINE(R) [Internet].  
<http://ovidsp.ovid.com/ovidweb.cgi?T=JS&PAGE=reference&D=med6&NEWS=N&AN=19359239>
1180. Ojiyi EC, Dike EI, Idrissa AU. Primary caeserean section in grandmultiparae at Mater Misericordiae Hospital Afikpo: a 5 year retrospective study. *Niger J Clin Pract* [Internet]. 2008 [cited 2008 Dec];11(4):368-71. In: Ovid MEDLINE(R) [Internet].  
<http://ovidsp.ovid.com/ovidweb.cgi?T=JS&PAGE=reference&D=med6&NEWS=N&AN=19320413>
1181. Grant MJ, Hallman KK. Pregnancy-related school dropout and prior school performance in KwaZulu-Natal, South Africa. *Stud Fam Plann* [Internet]. 2008 [cited 2008 Dec];39(4):369-82. In: Ovid MEDLINE(R) [Internet].  
<http://ovidsp.ovid.com/ovidweb.cgi?T=JS&PAGE=reference&D=med6&NEWS=N&AN=19248721>
1182. Maart LC, Rendall-Mkosi K, Jackson DJ. Knowledge, attitudes and practices related to healthy childbearing in the West Coast/Winelands. *Curationis* [Internet]. 2008 [cited 2008 Jun];31(2):22-9. In: Ovid MEDLINE(R) [Internet].  
<http://ovidsp.ovid.com/ovidweb.cgi?T=JS&PAGE=reference&D=med6&NEWS=N&AN=19006955>
1183. Richard F, Ouedraogo C, De Brouwere V. Quality cesarean delivery in Ouagadougou, Burkina Faso: a comprehensive approach. *Int J Gynaecol Obstet* [Internet]. 2008 [cited 2008 Dec];103(3):283-90. In: Ovid MEDLINE(R) [Internet].  
<http://ovidsp.ovid.com/ovidweb.cgi?T=JS&PAGE=reference&D=med6&NEWS=N&AN=18992882>
1184. Belay M, Deressa W. Use of insecticide treated nets by pregnant women and associated factors in a pre-dominantly rural population in northern Ethiopia. *Trop Med Int*

- Health [Internet]. 2008 [cited 2008 Oct];13(10):1303-13. In: Ovid MEDLINE(R) [Internet].  
<http://ovidsp.ovid.com/ovidweb.cgi?T=JS&PAGE=reference&D=med6&NEWS=N&AN=18937746>
1185. Turner KL, Hyman AG, Gabriel MC. Clarifying values and transforming attitudes to improve access to second trimester abortion. *Reprod Health Matters* [Internet]. 2008 [cited 2008 May];16(31 Suppl):108-16. In: Ovid MEDLINE(R) [Internet].  
<http://ovidsp.ovid.com/ovidweb.cgi?T=JS&PAGE=reference&D=med6&NEWS=N&AN=18772091>
1186. Usta MB, Mitchell EM, Gebreselassie H, Brookman-Amissah E, Kwizera A. Who is excluded when abortion access is restricted to twelve weeks? Evidence from Maputo, Mozambique. *Reprod Health Matters* [Internet]. 2008 [cited 2008 May];16(31 Suppl):14-7. In: Ovid MEDLINE(R) [Internet].  
<http://ovidsp.ovid.com/ovidweb.cgi?T=JS&PAGE=reference&D=med6&NEWS=N&AN=18772079>
1187. Hamers RL, Derdelinckx I, van Vugt M, Stevens W, Rinke de Wit TF, Schuurman R, PharmAccess African Studies to Evaluate Resistance Programme. The status of HIV-1 resistance to antiretroviral drugs in sub-Saharan Africa. *Antivir Ther* [Internet]. 2008 [cited 2008];13(5):625-39. In: Ovid MEDLINE(R) [Internet].  
<http://ovidsp.ovid.com/ovidweb.cgi?T=JS&PAGE=reference&D=med6&NEWS=N&AN=18771046>
1188. Furuta M, Mori R. Factors affecting women's health-related behaviors and safe motherhood: a qualitative study from a refugee camp in eastern Sudan. *Health Care Women Int* [Internet]. 2008 [cited 2008 Sep];29(8):884-905. In: Ovid MEDLINE(R) [Internet].  
<http://ovidsp.ovid.com/ovidweb.cgi?T=JS&PAGE=reference&D=med6&NEWS=N&AN=18726797>
1189. Chilongozi D, Wang L, Brown L, Taha T, Valentine M, Emel L, Sinkala M, Kafulafula G, Noor RA, Read JS, Brown ER, Goldenberg RL, Hoffman I, HIVNET 024 Study Team. Morbidity and mortality among a cohort of human immunodeficiency virus type 1-infected and uninfected pregnant women and their infants from Malawi, Zambia, and Tanzania. *Pediatr Infect Dis J* [Internet]. 2008 [cited 2008 Sep];27(9):808-14. In: Ovid MEDLINE(R) [Internet].  
<http://ovidsp.ovid.com/ovidweb.cgi?T=JS&PAGE=reference&D=med6&NEWS=N&AN=18679152>
1190. Dahl V, Mellhammar L, Bajunirwe F, Bjorkman P. Acceptance of HIV testing among women attending antenatal care in south-western Uganda: risk factors and reasons for test refusal. *AIDS Care* [Internet]. 2008 [cited 2008 Jul];20(6):746-52. In: Ovid MEDLINE(R) [Internet].  
<http://ovidsp.ovid.com/ovidweb.cgi?T=JS&PAGE=reference&D=med6&NEWS=N&AN=18576178>
1191. Kiwanuka SN, Ekirapa EK, Peterson S, Okui O, Rahman MH, Peters D, Pariyo GW. Access to and utilisation of health services for the poor in Uganda: a systematic review of available evidence. *Trans R Soc Trop Med Hyg* [Internet]. 2008 [cited 2008 Nov];102(11):1067-74. In: Ovid MEDLINE(R) [Internet].  
<http://ovidsp.ovid.com/ovidweb.cgi?T=JS&PAGE=reference&D=med6&NEWS=N&AN=18565559>
1192. Mbonye AK, Hansen KS, Bygbjerg IC, Magnussen P. Intermittent preventive treatment of malaria in pregnancy: the incremental cost-effectiveness of a new delivery system in Uganda. *Trans R*

- Soc Trop Med Hyg [Internet]. 2008 [cited 2008 Jul];102(7):685-93. In: Ovid MEDLINE(R) [Internet].  
<http://ovidsp.ovid.com/ovidweb.cgi?T=JS&PAGE=reference&D=med6&NEWS=N&AN=18513767>
1193. Sule SS, Ijadunola KT, Onayade AA, Fatusi AO, Soetan RO, Connell FA. Utilization of primary health care facilities: lessons from a rural community in southwest Nigeria. Niger J Med [Internet]. 2008 [cited 2008 Jan-Mar];17(1):98-106. In: Ovid MEDLINE(R) [Internet].  
<http://ovidsp.ovid.com/ovidweb.cgi?T=JS&PAGE=reference&D=med6&NEWS=N&AN=18390144>
1194. Mbonye AK, Schultz Hansen K, Bygbjerg IC, Magnussen P. Effect of a community-based delivery of intermittent preventive treatment of malaria in pregnancy on treatment seeking for malaria at health units in Uganda. Public Health [Internet]. 2008 [cited 2008 May];122(5):516-25. In: Ovid MEDLINE(R) [Internet].  
<http://ovidsp.ovid.com/ovidweb.cgi?T=JS&PAGE=reference&D=med6&NEWS=N&AN=18358506>
1195. Deribe K, Woldemichael K, Wondafrash M, Haile A, Amberbir A. Disclosure experience and associated factors among HIV positive men and women clinical service users in Southwest Ethiopia. BMC Public Health [Internet]. 2008 [cited 2008 Feb 29];881. In: Ovid MEDLINE(R) [Internet].  
<http://ovidsp.ovid.com/ovidweb.cgi?T=JS&PAGE=reference&D=med6&NEWS=N&AN=18312653>
1196. Gikandi PW, Noor AM, Gitonga CW, Ajanga AA, Snow RW. Access and barriers to measures targeted to prevent malaria in pregnancy in rural Kenya. Trop Med Int Health [Internet]. 2008 [cited 2008 Feb];13(2):208-17. In: Ovid MEDLINE(R) [Internet].  
<http://ovidsp.ovid.com/ovidweb.cgi?T=JS&PAGE=reference&D=med6&NEWS=N&AN=18304267>
1197. Mbonye AK, Bygbjerg IC, Magnussen P. Intermittent preventive treatment of malaria in pregnancy: a new delivery system and its effect on maternal health and pregnancy outcomes in Uganda. Bull World Health Organ [Internet]. 2008 [cited 2008 Feb];86(2):93-100. In: Ovid MEDLINE(R) [Internet].  
<http://ovidsp.ovid.com/ovidweb.cgi?T=JS&PAGE=reference&D=med6&NEWS=N&AN=18297163>
1198. Hoffman IF, Martinson FE, Powers KA, Chilongozi DA, Msiska ED, Kachipapa EI, Mphande CD, Hosseinipour MC, Chanza HC, Stephenson R, Tsui AO. The year-long effect of HIV-positive test results on pregnancy intentions, contraceptive use, and pregnancy incidence among Malawian women. J Acquir Immune Defic Syndr [Internet]. 2008 [cited 2008 Apr 01];47(4):477-83. In: Ovid MEDLINE(R) [Internet].  
<http://ovidsp.ovid.com/ovidweb.cgi?T=JS&PAGE=reference&D=med6&NEWS=N&AN=18209677>
1199. Gurmu E, Mace R. Fertility decline driven by poverty: the case of Addis Ababa, Ethiopia. J Biosoc Sci [Internet]. 2008 [cited 2008 May];40(3):339-58. In: Ovid MEDLINE(R) [Internet].  
<http://ovidsp.ovid.com/ovidweb.cgi?T=JS&PAGE=reference&D=med6&NEWS=N&AN=18190731>
1200. Brown CA, Sohani SB, Khan K, Lilford R, Mukhwana W. Antenatal care and perinatal outcomes in Kwale district, Kenya. BMC Pregnancy Childbirth [Internet]. 2008 [cited 2008 Jan 10];82. In: Ovid

MEDLINE(R) [Internet].

<http://ovidsp.ovid.com/ovidweb.cgi?T=JS&PAGE=reference&D=med6&NEWS=N&AN=18186921>

1201. Mills S, Williams JE, Adjuik M, Hodgson A. Use of health professionals for delivery following the availability of free obstetric care in northern Ghana. *Matern Child Health J* [Internet]. 2008 [cited 2008 Jul];12(4):509-18. In: Ovid MEDLINE(R) [Internet].  
<http://ovidsp.ovid.com/ovidweb.cgi?T=JS&PAGE=reference&D=med6&NEWS=N&AN=17955355>

## SEARCH FINDINGS FOR WEB OF SCIENCE

**SEARCH RESULTS= 10. DATE LAST SEARCHED= 23/4/19**

Web of Science [v.5.32] - WOS Export Transfer Service

Close

Web of Science

Page 1 (Records 1 -- 10)

[ 1 ] 

Record 1 of 10

Title: Mothers treatment seeking intention for neonatal danger signs in northwest Ethiopia: A structural equation modeling

Author(s): Bogale, TN (Bogale, Tariku Nigatu); Worku, AG (Worku, Abebaw Gebeyehu); Yalew, AW (Yalew, Alemayehu Worku); Bikis, GA (Bikis, Gashaw Andargie);

Kebede, ZT (Kebede, Zemene Tigabu)

Source: PLOS ONE Volume: 13 Issue: 12 Article Number: e0209959 DOI:  
10.1371/journal.pone.0209959 Published: DEC 31 2018

Accession Number: WOS:000454627200117

PubMed ID: 30596745

ISSN: 1932-6203

## Record 2 of 10

Title: Estimating levels of HIV testing coverage and use in prevention of mother-to-child transmission among women of reproductive age in Zambia

Author(s): Muyunda, B (Muyunda, Brian); Mee, P (Mee, Paul); Todd, J (Todd, Jim); Musonda, P (Musonda, Patrick); Michelo, C (Michelo, Charles)

Source: ARCHIVES OF PUBLIC HEALTH Volume: 76 Article Number: 80 DOI: 10.1186/s13690-018-0325-x Published: DEC 29 2018

Accession Number: WOS:000454558300001

PubMed ID: 30619607

ISSN: 0778-7367

eISSN: 2049-3258

## Record 3 of 10

Title: Bypassing health facilities in rural Mozambique: spatial, institutional, and individual determinants

Author(s): Yao, J (Yao, Jing); Agadjanian, V (Agadjanian, Victor)

Source: BMC HEALTH SERVICES RESEARCH Volume: 18 Article Number: 1006 DOI: 10.1186/s12913-018-3834-y Published: DEC 29 2018

Accession Number: WOS:000454562700012

PubMed ID: 30594198

ISSN: 1472-6963

## Record 4 of 10

Title: Acceptability of option B plus among HIV positive women receiving antenatal and postnatal care services in selected health centre's in Lusaka

Author(s): Chanda, BC (Chanda, Bridget Chomba); Likwa, RN (Likwa, Rosemary Ndonyo); Zgambo, J (Zgambo, Jessy); Tembo, L (Tembo, Louis); Jacobs, C (Jacobs,

Choolwe)

Source: BMC PREGNANCY AND CHILDBIRTH Volume: 18 Article Number: 510 DOI: 10.1186/s12884-018-2142-1 Published: DEC 29 2018

Accession Number: WOS:000454579200002

PubMed ID: 30594161

apps.webofknowledge.com/OutboundService.do?action=go&displayCitedRefs=true&displayTimesCited=true&displayUsageInfo=true&viewType=summary&product=WOS&mark\_id=WOS&colName=WOS&search\_m... 1/3

Print

7/19/2019 Web of Science [v.5.32] - WOS Export Transfer Service

ISSN: 1471-2393

Record 5 of 10

Title: HIV incidence among pregnant and postpartum women in a high prevalence setting

Author(s): Machekano, R (Machekano, Rhoderick); Tiam, A (Tiam, Appolinaire); Kassaye, S (Kassaye, Seble); Tukei, V (Tukei, Vincent); Gill, M (Gill, Michelle); Mohai, F

(Mohai, Florence); Nchepe, M (Nchepe, Masepeli); Mokone, M (Mokone, Majoalane); Barasa, J (Barasa, Janet); Mohale, S (Mohale, Sesomo); Letsie, M (Letsie,

Mosilinyane); Guay, L (Guay, Laura)

Source: PLOS ONE Volume: 13 Issue: 12 Article Number: e0209782 DOI: 10.1371/journal.pone.0209782 Published: DEC 28 2018

Accession Number: WOS:000454621900041

PubMed ID: 30592749

ISSN: 1932-6203

Record 6 of 10

Title: Knowledge on birth preparedness and complication readiness among expecting couples in rural Tanzania: Differences by sex cross-sectional study

Author(s): Moshi, FV (Moshi, Fabiola V.); Ernest, A (Ernest, Alex); Fabian, F (Fabian, Flora); Kibusi, SM (Kibusi, Stephen M.)

Source: PLOS ONE Volume: 13 Issue: 12 Article Number: e0209070 DOI: 10.1371/journal.pone.0209070 Published: DEC 28 2018

Accession Number: WOS:000454621900014

PubMed ID: 30592725

ISSN: 1932-6203

Record 7 of 10

Title: Spontaneous haemorrhagic stroke complicating severe pre-eclampsia in pregnancy: a case report in a resource-limited setting in Cameroon

Author(s): Tolefac, PN (Tolefac, Paul Nkemtendong); Awungafac, NS (Awungafac, Nkemnji Standley); Minkande, JZ (Minkande, Jacqueline Ze)

Source: BMC PREGNANCY AND CHILDBIRTH Volume: 18 Article Number: 506 DOI: 10.1186/s12884-018-2157-7 Published: DEC 27 2018



Accession Number: WOS:000454408800002

PubMed ID: 30587133

Author Identifiers:

Author Web of Science ResearcherID ORCID Number

Tolefac, Paul Nkemtendong 0000-0001-5165-7887

ISSN: 1471-2393

Record 8 of 10

Title: Postnatal care service utilization and associated factors among women who gave birth in Debretabour town, North West Ethiopia: a community- based crosssectional study

Author(s): Wudineh, KG (Wudineh, Kihinetu Gelaye); Nigusie, AA (Nigusie, Azezu Asres); Gesese, SS (Gesese, Shumiye Shiferaw); Tesu, AA (Tesu, Azimeraw Arega);

Beyene, FY (Beyene, Fentahun Yenealem)

[apps.webofknowledge.com/OutboundService.do?action=go&displayCitedRefs=true&displayTimesCited=true&displayUsageInfo=true&viewType=summary&product=WOS&mark\\_id=WOS&colName=WOS&search\\_m...](https://apps.webofknowledge.com/OutboundService.do?action=go&displayCitedRefs=true&displayTimesCited=true&displayUsageInfo=true&viewType=summary&product=WOS&mark_id=WOS&colName=WOS&search_m...) 2/3

7/19/2019 Web of Science [v.5.32] - WOS Export Transfer Service

Source: BMC PREGNANCY AND CHILDBIRTH Volume: 18 Article Number: 508 DOI: 10.1186/s12884-018-2138-x Published: DEC 27 2018

Accession Number: WOS:000454578900002

PubMed ID: 30591039

ISSN: 1471-2393

Record 9 of 10

Title: Factors associated with institutional delivery: Findings from a cross-sectional study in Mara and Kagera regions in Tanzania

Author(s): Bishanga, DR (Bishanga, Dunstan R.); Drake, M (Drake, Mary); Kim, YM (Kim, Young-Mi); Mwanamsangu, AH (Mwanamsangu, Amasha H.); Makuwani, AM

(Makuwani, Ahmad M.); Zoungrana, J (Zoungrana, Jeremie); Lemwayi, R (Lemwayi, Ruth); Rijken, MJ (Rijken, Marcus J.); Stekelenburg, J (Stekelenburg, Jelle)

Source: PLOS ONE Volume: 13 Issue: 12 Article Number: e0209672 DOI: 10.1371/journal.pone.0209672 Published: DEC 26 2018

Accession Number: WOS:000454416400083

PubMed ID: 30586467

Author Identifiers:

Author Web of Science ResearcherID ORCID Number

Kim, Young Mi 0000-0002-8815-4957

Rijken, Marcus 0000-0003-0914-5508

Mwanamsangu, Amasha 0000-0003-0702-3304

ISSN: 1932-6203

Record 10 of 10

Title: Application of Core Processes for Understanding Multiple Concurrent Sexual Partnerships Among Adolescents in Uganda

Author(s): Nalukwago, J (Nalukwago, Judith); Alaii, J (Alaii, Jane); Van den Borne, B (Van den Borne, Bart); Bukuluki, PM (Bukuluki, Paul Mukisa); Crutzen, R

(Crutzen, Rik)

Source: FRONTIERS IN PUBLIC HEALTH Volume: 6 Article Number: 371 DOI: 10.3389/fpubh.2018.00371 Published: DEC 21 2018

Accession Number: WOS:000454437200001

PubMed ID: 30622938

ISSN: 2296-2565

Close

Clarivate

Accelerating innovation

Web of Science

Page 1 (Records 1 -- 10)

?

[ 1 ] ?

© 2019 Clarivate Copyright notice Terms of use Privacy statement Cookie policy
