# Supplementary material
Source: HighWire-hosted journal article supplement (https://bmjopen.bmj.com/content/9/10/e031890)
Supplement: inline-supplementary-material-4 [file inline-supplementary-material-4.pdf]

**Table 1: Articles included in the review**

| Author            | Location                                                                     | Study Design              | Sample Size/Population                                               | Summary of findings                                                                                                                                                                                        |
|-------------------|------------------------------------------------------------------------------|---------------------------|----------------------------------------------------------------------|------------------------------------------------------------------------------------------------------------------------------------------------------------------------------------------------------------|
| Dahiru et al 2013 | Nigeria                                                                      | SA of 2013 NDHS           | 38,945 women aged 15-49 years                                        | Older age (+), rural residence (-), mother's and husband' level of education (+), working status of the woman (+), rich household (+), health insurance (+), Christian and Muslim religion (+)             |
| Muchie 2017       | Ethiopia                                                                     | SA 2014 DHS               | 3694 women aged 15-49 years                                          | Lower educational level (-), lower economic conditions (-), higher birth order (-), rural residence (-), available high quality ANC services (+)                                                           |
| Gebre 2018        | Ethiopia                                                                     | SA 2000-2016 Ethiopia DHS | 5867 (year 2000), 2279 (year 2016)                                   | Low-economic status (-), illiteracy (-), rural residence (-), no occupation (-), poor access to mass media (-)                                                                                             |
| Yaya 2018         | Benin                                                                        | Benin DHS                 | 17,794 and 16,599 women in 2006 and 2012 respectively.               | Education (+), higher wealth index (+), rural residence (-), employed (+)                                                                                                                                  |
| Yaya 2017         | Ethiopia                                                                     | SA 2011 Ethiopia DHS      | 10,896 women                                                         | Frequency- older age interval (-), rural residence (+), primigravidity (+), unemployed (+)<br>Timing- Rural residence (-), multiparity (-)<br>Age >31 years (-), single women (-), poor social support (-) |
| Rurangirwa 2017   | Rwanda                                                                       | Cross-sectional study     | 921 women                                                            |                                                                                                                                                                                                            |
| Akinyemi 2017     | Nigeria                                                                      | SA 2013 NDHS              | 20,467 women                                                         | Low formal education (-), poverty (-) healthcare access problems (-)                                                                                                                                       |
| Saad-Haddad 2016  | Multi-country- Bangladesh, Cambodia, Peru, Cameroon, Nepal, Senegal, Uganda. | SA NDHS                   | 7576, 8008, 4818 women, in Cameroon; Senegal and Uganda respectively | Education (+) household wealth(+), gestational age at first visit (-), birth rank (-), preceding birth interval (-)                                                                                        |
| Worku 2016        | South Africa                                                                 | Cross-sectional           | 272 mothers                                                          | Mother's age >20 years (+), increased distance to health facility(+), service satisfaction (+)                                                                                                             |
| Manthalu 2016     | Malawi                                                                       | SA                        | 142 health facilities                                                | Use fee exemption (+)                                                                                                                                                                                      |
| Fagbamigbe 2017   | Nigeria                                                                      | SA                        | 6,299 females                                                        | Low education (-), poverty (-)                                                                                                                                                                             |
| Tsegay 2013       | Ethiopia                                                                     | cross-sectional study     | 1113 women                                                           | Married (+), educated (+), proximity of health facility to the village(+), and husband's not a farmer (+)                                                                                                  |
| Babalola 2009     | Nigeria                                                                      | SA                        | 2148 women                                                           | Education (+), older age at the birth of last child (+), and approval of family planning (+), urban residence(+), wealthy household (+), large number of clients in PHC (-)                                |
| Abor 2011         | Ghana                                                                        | Ghana DHS                 | 5588 women                                                           | Older age (-), multiple pregnancies (-), education (+), religious affiliation (+), high economic status (+)                                                                                                |
| Wilunda 2015      | Ethiopia                                                                     | Cross-sectional study     | 500 women                                                            | High wealth status (+), knowledge of the recommended number of ANC visits (+), attitude towards maternal health care (+), older age (-)                                                                    |
| Abosse 2010       | Ethiopia                                                                     | Cross-sectional study     | 691 women                                                            | Older age (+), husband's positive attitude to ANC (+), small family size (+), no education (-)                                                                                                             |
| Zegeye 2013       | Ethiopia                                                                     | Cross-sectional           | 446 women                                                            | Timing: Mothers with no parity before (+), good knowledge on early ANC (+), planned pregnancy (+)                                                                                                          |

|                  |          |                       |                                       |                                                                                                                                                                                                                                                                                                                                                          |
|------------------|----------|-----------------------|---------------------------------------|----------------------------------------------------------------------------------------------------------------------------------------------------------------------------------------------------------------------------------------------------------------------------------------------------------------------------------------------------------|
| Akowuah 2018     | Ghana    | Cross-sectional study | 200 pregnant women                    | Older age (+), large household size (+), employed (+)                                                                                                                                                                                                                                                                                                    |
| Adewuyi 2018     | Nigeria  | SA of DHS 2013        | 19652 mothers aged 15 to 49 years old | Rural: maternal non-working status (-), birth interval < 24 months (-), single birth type (-), not listening to radio at all (-), lack of companionship to health facility (-), not getting money for health services (-)<br>Urban: mothers professing Islam (-), those who did not read newspaper at all (-), and those who lacked health insurance (-) |
| Brown et al 2008 | Kenya    | Cross-sectional       | 1,562 perinatal outcomes              | Education: secondary education or above (+),<br>Distance: living further than 5 km from a dispensary (-),<br>Secondary or higher education (+), greater wealth (+), urban residence (+), parity of 3–4 (+)                                                                                                                                               |
| Mbuagbaw 2011    | Camaeron | DHS                   | 7,557 women                           | Parity (+), literacy status of women (+), average monthly family income (+), media exposure (+), decision where to give birth (+), perception of distance to health institutions (+)                                                                                                                                                                     |
| Birmeta 2013     | Ethiopia | Cross-sectional       | 422 women                             | Women with higher education (+), Women from urban areas (+), autonomous women (+)                                                                                                                                                                                                                                                                        |
| Tarekegn 2014    | Ethiopia | DHS                   | 16,515 women                          | Young age (+), least educated (+), poorest women (+) women whose partners were uneducated (+), those with health insurance (+), low socioeconomic status (-)                                                                                                                                                                                             |
| Sakeah 2017      | Ghana    | Cross-sectional       | 1497 women                            | Timing: rural (-), secondary education (+), higher parity (-), married (+)                                                                                                                                                                                                                                                                               |
| Ochako 2011      | Kenya    | SA 2003 KDHS          | 1675 young women                      | Living in communities with a high proportion of women who delivered in a health facility (+), Residence in high-poverty communities (-)                                                                                                                                                                                                                  |
| Ononokpono 2013  | Nigeria  | DHS                   | 16,005 women                          | Older mothers (+), urban residents (+), higher education (+), farmer mothers (+)                                                                                                                                                                                                                                                                         |
| Melaku 2014      | Ethiopia | Cross-sectional       | 2361 mothers                          | Young age (+)                                                                                                                                                                                                                                                                                                                                            |
| Straneo 2016     | Tanzania | Cross sectional       | 464 women                             | Timing: young age (+)                                                                                                                                                                                                                                                                                                                                    |
| Ononokpono 2015  | Nigeria  | SA NDHS 2008          | 17560 women                           | Younger women (+), secondary/higher education (+),<br>Employed (+), Christian women (+), rich households (+), involvement in decision making (+), joint decision (+), Igbo, Yoruba and other minority ethnic groups (+), urban areas (+), educated women (+), exposed to mass media (+)                                                                  |
| Arthur 2013      | Ghana    | SA of GDHS 2008       | NR                                    | Wealth (+), urban areas (+), mothers with health insurance (+), educational level (+)                                                                                                                                                                                                                                                                    |
| Tewodros 2009    | Ethiopia | Cross-sectional       | 627 women                             | Educated (+), less than 60 minute walk to facility (+), husband approval (+), illness in future pregnancies (+), planned pregnancy and illness experienced in past pregnancy (+), age at first pregnancy (+)                                                                                                                                             |
| Gupta 2014       | Tanzania | SA of DHS             | 8,035 women                           | urban areas (+)                                                                                                                                                                                                                                                                                                                                          |

|                    |                              |                 |                                                                            |                                                                                                                                                                                                 |
|--------------------|------------------------------|-----------------|----------------------------------------------------------------------------|-------------------------------------------------------------------------------------------------------------------------------------------------------------------------------------------------|
| Ntambue 2012       | Democratic Republic of Congo | Cross-sectional | 1762 women                                                                 | primiparous and grand multiparous (-), unplanned pregnancies (-)                                                                                                                                |
| Mwase 2018         | Burkina Faso                 | Cross-sectional | 6601 women                                                                 | least poor households (+), married (+), living further away (-), multiparous (-), Muslim religion (-),                                                                                          |
| Bobo 2017          | Ethiopia                     | SA of DHS 2014  | 8070 women                                                                 | urban area (+), secondary level (+),                                                                                                                                                            |
| Anchang-Kimbi 2014 | Burkina Faso                 | Cross-sectional | 287 parturient women                                                       | Only one dose of IPTp (-)                                                                                                                                                                       |
| Melese et al 2016  | Ethiopia                     | Cross-sectional | Women (15-49 years) who gave birth in one year preceding the study (n=748) | Preference of skilled personnel (+), awareness about places where to get skilled providers (+), listening to radio (+), distance of WHDT within 2km radius from the nearest health facility (+) |

DHS: Demographic health survey, SA: Secondary Analysis FGD: Focal Group Discussion SA: Secondary Analysis, IDI: In-depth interview, ANC: Antenatal care, TBAs: Traditional birth attendants NR: Not Reported IPTp: intermittent preventive treatment during pregnancy \*Only results for Cameroon, Senegal, Uganda included in review NR: Not reported (+): increases ANC use (-) reduces ANC use

**Table 2: Articles included in the review**

| Author           | Location          | Study Design                                                | Sample Size/Population                      | Summary of findings                                                                                                                                                         |
|------------------|-------------------|-------------------------------------------------------------|---------------------------------------------|-----------------------------------------------------------------------------------------------------------------------------------------------------------------------------|
| Kyei 2012        | Zambia            | SA 2007 DHS                                                 | 2405 rural births                           | Distance(+), level of provision category (+)                                                                                                                                |
| Doctor 2011      | Nigeria           | SA 2008 Nigeria DHS                                         | 18,028) women                               | youngest age cohort(-), rural residence (-), lack of schooling (-), higher parity (-), residence in northern region(-) and poor economic status(-)                          |
| Woldemicael 2010 | Eritrea, Ethiopia | SA DHS 2007                                                 | Currently married women                     | Women's autonomy (+)                                                                                                                                                        |
| Kibusi 2018      | Tanzania          | SA 2011/2012 Tanzania HIV/AIDS and malaria indicator survey | 4513 women                                  | Having health insurance (+)                                                                                                                                                 |
| Makate 2017      | Zimbabwe          | SA ZDHS 2005/06 and 2010/11                                 | 8907 women ( 2005/06), 9171 women (2010/11) | Contraceptive prevalence (+), religious composition (+), density of nurses (+), health expenditures per capita (+), availability of government hospitals in communities (+) |
| Haruna-Ogun      | Nigeria           | NDHS 2013                                                   | 20,192 cases                                | Place of residence (+)                                                                                                                                                      |
| Aliyu 2017       | Nigeria           | SA NDHS 2013                                                | 20,467 women                                | maternal education (+), media exposure (+), place of residence (+), having health insurance(+)                                                                              |

|               |                                  |                                                         |                                                               |                                                                                                                                                                                   |
|---------------|----------------------------------|---------------------------------------------------------|---------------------------------------------------------------|-----------------------------------------------------------------------------------------------------------------------------------------------------------------------------------|
| Banke-Thomas  | Ethiopia                         | SA Kenya DHS                                            | 898 adolescents                                               | Having education (+), religion (+), ethnicity (+), urban residence (+), wealth quintile (+), mass media exposure (+), and geographical region (+)                                 |
| Kuuiire 2017  | Nigeria<br>Malawi                | SA NDHS 2003, 2008 and 2013<br>MDHS 2000, 2004 and 2010 | Nigeria (39,923 women) and Malawi (28,951 women).             | Nigeria: Wealth (+)<br>Malawi: Wealth (-)                                                                                                                                         |
| Chorongo 2018 | Kenya                            | Cross-sectional comparative study                       | 385 women                                                     | Being Muslim (+), Higher education (-),                                                                                                                                           |
| Owili 2016    | Kenya                            | SA KDHS                                                 | 4005 women                                                    | Monogamous setting (+), marriage (+), Older age (+), religion (+), health insurance (+), Exposure to media (+), higher education (+)                                              |
| Bayou 2016    | Ethiopia                         | Cross sectional                                         | 870 women                                                     | Higher education (+), ANC in private facility (+)                                                                                                                                 |
| Browne 2016   | Ghana                            | SA GDHS 2008                                            | 3022 Women                                                    | Being insured (+)                                                                                                                                                                 |
| Ochako 2016   | Kenya                            | 2008-09 Kenya DHS.                                      | 4014 women                                                    | Wanted pregnancy (+), Urban residence (+), Higher education (+), Older age (+), birth interval less than 25 months (-)                                                            |
| Muhwava 2016  | South Africa                     | Cross sectional                                         | 363 women from rural sample and 466 women from urban          | Urban :Being employed (+), wanted pregnancy<br>Rural site: Being married (+), Religiosity (-)                                                                                     |
| Gudayu 2015   | Ethiopia                         | Cross sectional                                         | 390 women                                                     | Not aware of right timing of booking (-), not autonomous to use ANC (-), Recognised pregnancy by missing period (-).                                                              |
| Oyewale 2015  | Nigeria                          | Cross sectional                                         | 384 pregnant women                                            | Older age (-), Higher education (-), Birth order (-), urban residence (+), health insurance coverage (+) and household income (+).                                                |
| Dutamo 2015   | Ethiopia                         | Cross sectional                                         | 634 currently married women                                   | Low parity (+), pregnancy intended (+), awareness of danger signs of pregnancy (+), higher education of woman and spouse (+)                                                      |
| Omer 2014     | Nigeria (Bauchi and Cross river) | Cross sectional                                         | 7870 women in Bauchi and of 7759 in Cross River               | Residence in community with a government health facility (+), absence of physical intimate partner violence (+)                                                                   |
| Manzi 2014    | Rwanda                           | SA 2010 RDHS                                            | 6,325 women                                                   | Having many children (-), feeling that distance to health facility is a problem (-), unwanted pregnancy (-),ANC at a private hospital (+),being married (+), health insurance (+) |
| Belayneh 2014 | Ethiopia                         | Cross sectional                                         | 398 pregnant women                                            | Early timing of ANC: Mothers with younger age (+), formal education (+), previous early ANC visit (+), perceived ANC visit per pregnancy of four and greater (+)                  |
| Rossier 2014  | Kenya, Burkina Faso              | SA Nairobi DHS, Ouagadougou DHS                         | 3,346 and 4,239 births in Kenya and Burkina Faso respectively | Kenya (at least one visit): Less-educated (-), poorer (-), non-Kikuyu women (-), women living in the neighbourhood farther from public health services (-)                        |

|                    |                               |                                                                |                                                                                              |                                                                                                                                                                                                  |
|--------------------|-------------------------------|----------------------------------------------------------------|----------------------------------------------------------------------------------------------|--------------------------------------------------------------------------------------------------------------------------------------------------------------------------------------------------|
| Ononokpono 2014    | Nigeria                       | 2008 Nigeria DHS                                               | 17,476 women                                                                                 | Burkina Faso (at least four visits); poorer households (-), non-educated women (-), women from Polesgo and Nioko tribe (-)                                                                       |
| Chama-Chiliba 2015 | Zambia                        | SA Zambia DHS                                                  | 2925 women                                                                                   | Intimate partner violence (+)                                                                                                                                                                    |
| Afewerk 2014       | Ethiopia                      | Cross-sectional                                                | 4949 women                                                                                   | Employment (+), low quality ANC (-), multiparity (-), higher education of husband (+),                                                                                                           |
| Oladokun 2010      | Nigeria                       | Cross-sectional                                                | 796 women                                                                                    | Visit by community health worker (+)                                                                                                                                                             |
| Stephenson 2012    | Bangladesh, Egypt, and Rwanda | SA DHS for Bangladesh (2007), Egypt (2008), and Rwanda (2005). | 4926, 8036, 5387 women respectively                                                          | Low parity (+), previous stillbirth (+)                                                                                                                                                          |
| Regassa 2011       | Ethiopia                      | Cross sectional                                                | 1094 women                                                                                   | Rwandan communities with higher employment rate among men (+)                                                                                                                                    |
| Rai 2012           | Nigeria                       | SA NDHS 2008                                                   | 2434 Women                                                                                   | Literacy (+), have exposure to media(+), low parity(+)                                                                                                                                           |
| Exavery 2013       | Tanzana                       | Cross-sectional household survey                               | 3,127 women                                                                                  | Women's education, (+), husband's Education (+), wealth (+), urban residence (+), Mass media exposure (+)                                                                                        |
| Worku 2013         | Ethiopia                      | Cross sectional                                                | 1668 women who had births in the year preceding the survey                                   | Mistimed pregnancy (-),                                                                                                                                                                          |
| Yeneneh 2018       | Ethiopia                      | Ethiopian DHS                                                  | 23,179 women who had a live birth in the five years preceding the survey                     | Higher educational of women and their husbands (+), higher wealth Quintiles (+), awareness of risk of pregnancy (+), preference for skilled provider(+), birth order (-), unwanted pregnancy (-) |
| Dansou 2017        | Benin Republic                | DHS                                                            | 9110 mothers who had completed at least a pregnancy within the 5 years preceding the survey  | Richest wealth quintiles(+), lowest number of birth order(+), urban residence(+), younger age(+) and educated(+)                                                                                 |
| Assefa 2016        | Ethiopia                      | DHS                                                            | 7,773 women aged 15-49 years who gave birth during the five-year period preceding the survey | Economically well-off households (+)for richest women (+), educated women(+),and those with desired pregnancies(+)                                                                               |
| Ayalew 2017        | Ethiopia                      | Cross sectional                                                | 317 women who gave birth 6 months before the study                                           | Urban residence (+), older mothers (+), education (+), employment (+), mass media exposure(+), religion (+), access to health services(+)                                                        |
| Begum 2018         | Niger                         | Cross sectional                                                | 923 pregnant women                                                                           | Older age (+), Education(+), history of stillbirth(+), planned pregnancy(+), service utilization                                                                                                 |
|                    |                               |                                                                |                                                                                              | Women with gestational age $\geq 27$ weeks (+), Women who reportedly received husbands' advice about attending ANC (+)                                                                           |

|                                                                                                                                                                                              |                                |                 |             |                                                                                                               |
|----------------------------------------------------------------------------------------------------------------------------------------------------------------------------------------------|--------------------------------|-----------------|-------------|---------------------------------------------------------------------------------------------------------------|
| Verney 2017                                                                                                                                                                                  | Senegal,<br>Ethiopia,<br>Kenya | Cross sectional | 4,575 women | Higher education(+), Higher income (+), formal employment(+),<br>advice from health worker(+), nulliparity(+) |
| <hr/> DHS: Demographic health Survey, SA: Secondary Analysis, IDI: In-depth interview, ANC: Antenatal care, TBAs: Traditional birth attendants (+): increases<br>ANC use (-) reduces ANC use |                                |                 |             |                                                                                                               |
